# Supplementary material for: Nickel-catalyzed carbodifunctionalization of N-vinylamides enables access to γ-amino acids
Source: Royal Society of Chemistry journal article supplement (doi:10.1039/c9cc09866f), 2020-01-01

*Supporting Information*

# **Nickel-Catalyzed Carbodifunctionalization of *N*-Vinylamides Enables Access to $\gamma$ -Amino Acids**

Zhi-Fang Yang,<sup>a</sup> Chang Xu,<sup>b</sup> Xing Zheng,<sup>\*a</sup> and Xingang Zhang<sup>\*b</sup>

<sup>a</sup>Hunan Province Cooperative Innovation Center for Molecular Target New Drug Study, Hunan Provincial Key Laboratory of tumor microenvironment responsive drug research, Institute of Pharmacy and Pharmacology, University of South China, Hengyang, Hunan, 421001, China..

<sup>b</sup>Key Laboratory of Organofluorine Chemistry, Center for Excellence in Molecular Synthesis, Shanghai Institute of Organic Chemistry, University of Chinese Academy of Sciences, Chinese Academy of Sciences, 345 Lingling Road, Shanghai 200032, China.

[xgzhang@mail.sioc.ac.cn;](mailto:xgzhang@mail.sioc.ac.cn)

[zhengxing9166@sohu.com](mailto:zhengxing9166@sohu.com)

## List of Contents

|                                                                                                                                                                                             |    |
|---------------------------------------------------------------------------------------------------------------------------------------------------------------------------------------------|----|
| 1. General Information and Materials.....                                                                                                                                                   | 3  |
| 2. Optimization of Ni-Catalyzed Difluoroacetylation-Arylation of <i>N</i> -Vinylacetamide <b>1a</b> with Arylboronic Acid <b>2a</b> and Bromodifluoroacetate <b>3a</b> (Tables S1-S4) ..... | 3  |
| 3. Preparation of <i>N</i> -Vinylamides <b>1</b> .....                                                                                                                                      | 6  |
| 4. General Procedure for the Ni-Catalyzed Carbodifunctionalization of <i>N</i> -Vinylacetamides.....                                                                                        | 8  |
| 5. Characterization Data of Compounds <b>4-32</b> .....                                                                                                                                     | 9  |
| 6. Transformations of <i>N</i> -Protected $\alpha,\alpha$ -Difluoro- $\gamma$ -Amino Acid Esters.....                                                                                       | 24 |
| 7. References .....                                                                                                                                                                         | 26 |
| 8. Copies of $^1\text{H}$ and $^{13}\text{C}$ NMR Spectra of Compound <b>1g</b> .....                                                                                                       | 27 |
| 9. Copies of $^1\text{H}$ , $^{13}\text{C}$ , and $^{19}\text{F}$ NMR Spectra of Compounds <b>4-32</b> .....                                                                                | 28 |
| 10. Copies of $^1\text{H}$ , $^{13}\text{C}$ , and $^{19}\text{F}$ NMR Spectra of Compounds <b>33-35</b> .....                                                                              | 69 |

## 1. General Information and Materials.

**General Information:**  $^1\text{H}$  NMR,  $^{13}\text{C}$  NMR and  $^{19}\text{F}$  NMR spectra were recorded on a Bruker AM 400 spectrometer and are calibrated using residual undeuterated solvent ( $\text{CHCl}_3$  at 7.26 ppm  $^1\text{H}$  NMR; 77.0 ppm  $^{13}\text{C}$  NMR;  $\text{CFCl}_3$  as an external standard and low field is positive). Chemical shifts ( $\delta$ ) are reported in ppm, and coupling constants ( $J$ ) are in Hertz (Hz). The following abbreviations were used to explain the multiplicities: s = singlet, d = doublet, t = triplet, q = quartet, m = multiplet. NMR yield was determined by  $^{19}\text{F}$  NMR using fluorobenzene as an internal standard before working up the reaction.

**Materials:** All reagents were used as received from commercial sources, unless otherwise specified, or prepared as described in the literature.  $\text{Ni}(\text{OTf})_2$  was purchased from Strem Chemicals and used as received. 1,4-Dioxane was purchased from Energy Chemicals and used as received.

## 2. Optimization of Ni-Catalyzed Difluoroacetylation-Arylation of *N*-Vinylacetamide **1a** with Arylboronic Acid **2a** and Bromodifluoroacetate **3a** (Tables S1-S4).

To a 25 mL of Schlenk tube were added *N*-vinylacetamide **1a** (1.0 equiv), 4-biphenylboronic acid **2a** (2.0 equiv), [Ni]-catalyst (5 mol %), ligand (5 mol %) and base (3.0 equiv) under argon atmosphere, followed by addition of  $\text{BrCF}_2\text{CO}_2\text{Et}$  **3a** (1.5 equiv), and solvent (4 mL). The tube was screw-capped and heated to 80 °C (oil bath). After stirring for 8 h, the reaction mixture was cooled to room temperature and fluorobenzene was added. The yield was determined by  $^{19}\text{F}$  NMR before working up. The reaction mixture was diluted with ethyl acetate, filtered through a pad of Celite and concentrated. The residue was purified with silica gel chromatography (Petroleum ether: Ethyl acetate = 1: 1) to afford product **4** as a white solid.

**Table S1. Screening of the Ligands.<sup>a</sup>**

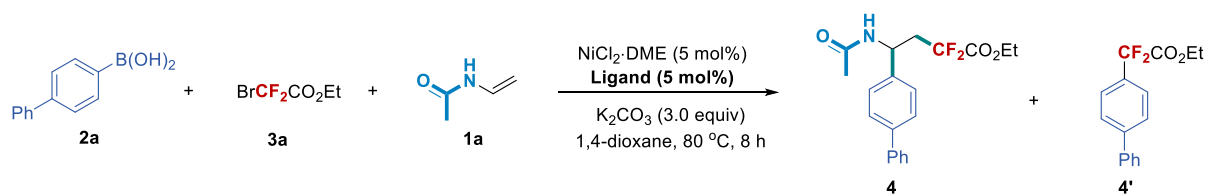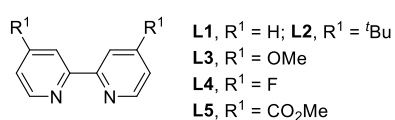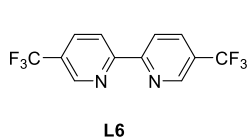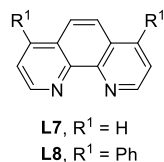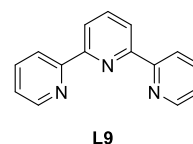

| entry | ligand ( <b>L</b> ) | yields of <b>4</b> / <b>4'</b> (%) |
|-------|---------------------|------------------------------------|
| 1     | <b>L1</b>           | 44 / 7                             |
| 2     | <b>L2</b>           | 30 / 17                            |
| 3     | <b>L3</b>           | 22 / 3                             |
| 4     | <b>L4</b>           | 32 / 12                            |
| 5     | <b>L5</b>           | 36 / 21                            |
| 6     | <b>L6</b>           | 60 / 21                            |
| 7     | <b>L7</b>           | 24 / 0                             |
| 8     | <b>L8</b>           | 32 / 4                             |
| 9     | <b>L9</b>           | nd / nd                            |
| 10    | <b>none</b>         | nd / nd                            |

<sup>a</sup>Reaction conditions (unless otherwise specified): **1a** (0.4 mmol, 1.0 equiv), **2a** (0.8 mmol, 2.0 equiv), **3a** (1.5 equiv), 1,4-dioxane (4 mL). <sup>b</sup>Determined by  $^{19}\text{F}$  NMR using fluorobenzene as an internal standard. The yield of **4'** was based on **3a**. nd, not detected.

**Table S2. Screening of the Nickel Sources.<sup>a</sup>**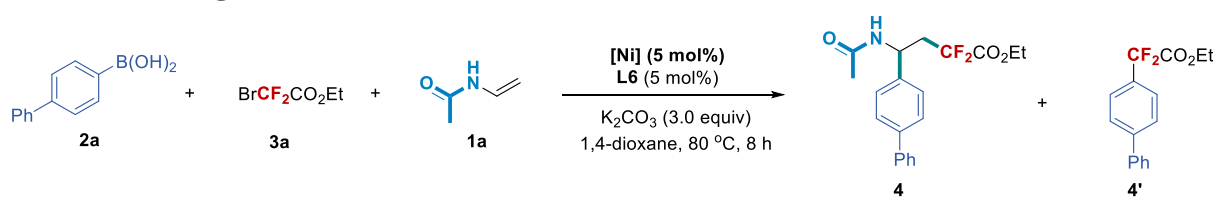

| entry | [Ni]                                               | yields of <b>4</b> / <b>4'</b> (%) |
|-------|----------------------------------------------------|------------------------------------|
| 1     | NiCl <sub>2</sub> ·DME                             | 60 / 21                            |
| 2     | NiBr <sub>2</sub> ·DME                             | 76 / 20                            |
| 3     | NiBr <sub>2</sub> ·diglyme                         | 76 / 19                            |
| 4     | NiBr <sub>2</sub> (PPh <sub>3</sub> ) <sub>2</sub> | 36 / 29                            |
| 5     | NiCl <sub>2</sub> (dppp)                           | trace / 18                         |
| 6     | NiCl <sub>2</sub> (dppe)                           | 10 / 30                            |
| 7     | NiCl <sub>2</sub>                                  | nd / nd                            |
| 8     | Ni(OTf) <sub>2</sub>                               | 80 / 20                            |
| 9     | Ni(COD) <sub>2</sub>                               | 64 / 3                             |
| 10    | None                                               | nd / nd                            |

<sup>a</sup>Reaction conditions (unless otherwise specified): **1a** (0.4 mmol, 1.0 equiv), **2a** (0.8 mmol, 2.0 equiv), **3a** (1.5 equiv), 1,4-dioxane (4 mL). <sup>b</sup>Determined by <sup>19</sup>F NMR using fluorobenzene as an internal standard. The yield of **4'** was based on **3a**. nd, not detected.

**Table S3. Screening of the Bases.<sup>a</sup>**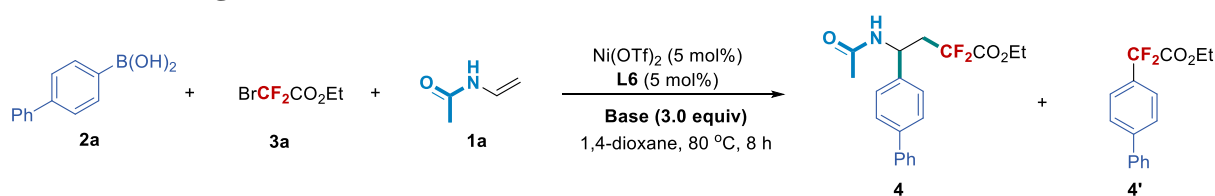

| entry | base                            | yields of <b>4</b> / <b>4'</b> (%) |
|-------|---------------------------------|------------------------------------|
| 1     | K <sub>2</sub> CO <sub>3</sub>  | 80 / 20                            |
| 2     | KHCO <sub>3</sub>               | 76 / 20                            |
| 3     | K <sub>3</sub> PO <sub>4</sub>  | 40 / 1                             |
| 4     | KOAc                            | nd / nd                            |
| 5     | Na <sub>2</sub> CO <sub>3</sub> | 20 / 4                             |
| 6     | NaHCO <sub>3</sub>              | 12 / 2                             |
| 7     | Cs <sub>2</sub> CO <sub>3</sub> | nd / nd                            |
| 8     | none                            | nd / nd                            |

<sup>a</sup>Reaction conditions (unless otherwise specified): **1a** (0.4 mmol, 1.0 equiv), **2a** (0.8 mmol, 2.0 equiv), **3a** (1.5 equiv), 1,4-dioxane (4 mL). <sup>b</sup>Determined by <sup>19</sup>F NMR using fluorobenzene as an internal standard. The yield of **4'** was based on **3a**. nd, not detected.

**Table S4. Screening of Loading Amount of Ni(OTf)<sub>2</sub> and L6.<sup>a</sup>**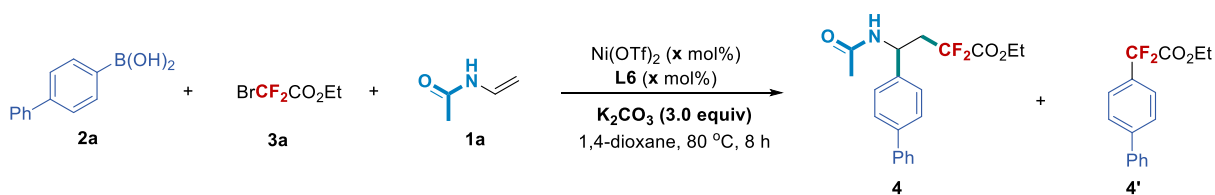

| entry | x   | yields of <b>4</b> / <b>4'</b> (%) |
|-------|-----|------------------------------------|
| 1     | 5   | 80 / 20                            |
| 2     | 3   | 74 / 16                            |
| 3     | 1.5 | 44 / 2                             |

<sup>a</sup>Reaction conditions (unless otherwise specified): **1a** (0.4 mmol, 1.0 equiv), **2a** (0.8 mmol, 2.0 equiv), **3a** (1.5 equiv), 1,4-dioxane (4 mL). <sup>b</sup>Determined by <sup>19</sup>F NMR using fluorobenzene as an internal standard. The yield of **4'** was based on **3a**.

### 3. Preparation of *N*-Vinylamides **1**

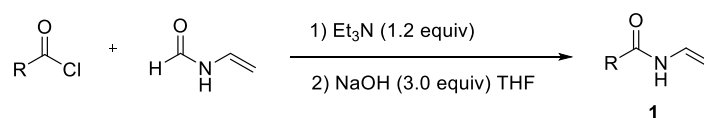

**General Procedure:** The preparation of **1** is according to the literature.<sup>1</sup> *N*-Vinylformamide (100 mmol, 1.0 equiv), triethylamine (120 mmol, 1.2 equiv), and anhydrous THF (250 mL) were added to a three-necked round-bottomed flask. The reaction mixture was cooled to 0 °C with an ice-water bath. The corresponding acid chloride (115 mmol, 1.15 equiv) was added dropwise over a period of 5 h with stirring. A solution of 5 N NaOH was then slowly added at 0-5 °C over 1 h and the resulting mixture was stirred for 8 h. The reaction mixture was extracted with EtOAc three times. The organic layers were combined, washed with brine, dried over anhydrous Na<sub>2</sub>SO<sub>4</sub> and filtered. The filtrate was concentrated, the residue was purified with silica gel chromatography (petroleum) to afford **1**.

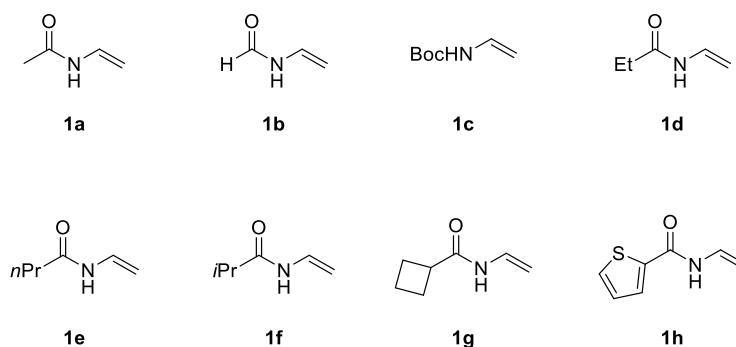

**Note:** Compounds **1a** and **1b** are commercially available. Compounds **1c-1f** and **1h** are known.

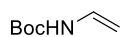

***tert*-Butyl vinylcarbamate (1c).** The reaction was carried out on 50 mmol-scale. Compound **1c** (5.48 g, 77% yield) as a white solid was purified with silica gel chromatography (Petroleum ether: Ethyl acetate = 5: 1). This compound is known.<sup>2</sup> <sup>1</sup>H NMR (400 MHz, CDCl<sub>3</sub>) δ 6.65 (br, 1H), 6.40 (br, 1H), 4.40 (d, *J* = 16 Hz, 1H), 4.20 (d, *J* = 7.2 Hz, 1H), 1.45 (s, 9H).

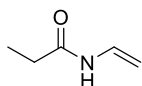

***N*-Vinylpropionamide (1d).** Compound **1d** (3.84 g, 39% yield) as a white solid was purified with silica gel chromatography (Petroleum ether: Ethyl acetate = 5: 1). This compound is known.<sup>3</sup> <sup>1</sup>H NMR (400 MHz, CDCl<sub>3</sub>) δ 8.03 (br, 1H), 7.00 – 6.88 (m, 1H), 4.60 (d, *J* = 16.0 Hz, 1H), 4.35 (d, *J* = 8.8 Hz, 1H), 2.25 (q, *J* = 7.6 Hz, 2H), 1.14 (t, *J* = 7.6 Hz, 3H).

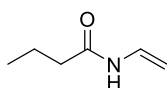

***N*-Vinylbutyramide (1e).** Compound **1e** (1.6 g, 14% yield) as a white solid was purified with silica gel chromatography (Petroleum ether: Ethyl acetate = 5: 1). This compound is known.<sup>4</sup> <sup>1</sup>H NMR (400 MHz, CDCl<sub>3</sub>) δ 7.47 (br, 1H), 7.04 – 6.90 (m, 1H), 4.59 (d, *J* = 16.0 Hz, 1H), 4.37 (d, *J* = 8.8 Hz, 1H), 2.21 (t, *J* = 7.6 Hz, 2H), 1.68 (m, 2H), 0.95 (t, *J* = 7.2 Hz, 3H).

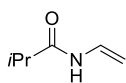

***N*-Vinylisobutyramide (1f).** Compound **1f** (5.8 g, 52% yield) as a white solid was purified with silica gel chromatography (Petroleum ether: Ethyl acetate = 5: 1). This compound is known.<sup>1</sup> <sup>1</sup>H NMR (400 MHz, CDCl<sub>3</sub>) δ 7.15 (br, 1H), 7.04 – 6.93 (m, 1H), 4.60 (d, *J* = 15.6 Hz, 1H), 4.39 (d, *J* = 8.8 Hz, 1H), 2.39 (m, 1H), 1.19 (s, 3H), 1.17 (s, 3H).

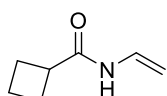

***N*-Vinylcyclobutanecarboxamide (1g).** The reaction was carried out on 83 mmol-scale. Compound **1g** (4.78 g, 47% yield) as a white solid (m.p. 45-46 °C) was purified with silica gel chromatography

(Petroleum ether: Ethyl acetate = 5: 1).  $^1\text{H}$  NMR (400 MHz,  $\text{CDCl}_3$ )  $\delta$  7.70 (br, 1H), 7.01 – 6.89 (m, 1H), 4.60 (d,  $J = 16.0$  Hz, 1H), 4.35 (d,  $J = 8.8$  Hz, 1H), 3.05 (p,  $J = 8.5$  Hz, 1H), 2.36 – 2.23 (m, 2H), 2.19 – 2.07 (m, 2H), 2.03 – 1.79 (m, 2H).  $^{13}\text{C}$  NMR (100 MHz,  $\text{CDCl}_3$ )  $\delta$  172.78, 128.65, 95.12, 39.50, 24.97, 18.03. MS (ESI):  $m/z$  (%) 126 ( $\text{M}+\text{H}$ ) $^+$ . HRMS (ESI): Calcd. for  $\text{C}_7\text{H}_{11}\text{ON}$ : 125.0841 ( $\text{M}$ ) $^+$ ; Found: 126.0931 ( $\text{M}+\text{H}$ ) $^+$ .

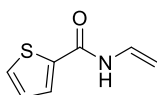

***N*-Vinylthiophene-2-carboxamide (1h).** Compound **1h** (1.6 g, 11% yield) as a white solid was purified with silica gel chromatography (Petroleum ether: Ethyl acetate = 5: 1). This compound is known.<sup>5</sup>  $^1\text{H}$  NMR (400 MHz,  $\text{CDCl}_3$ )  $\delta$  7.91 (br, 1H), 7.61 (d,  $J = 3.6$  Hz, 1H), 7.53 (d,  $J = 5.2$  Hz, 1H), 7.19 – 7.06 (m, 2H), 4.77 (d,  $J = 16.0$  Hz, 1H), 4.51 (d,  $J = 8.8$  Hz, 1H).

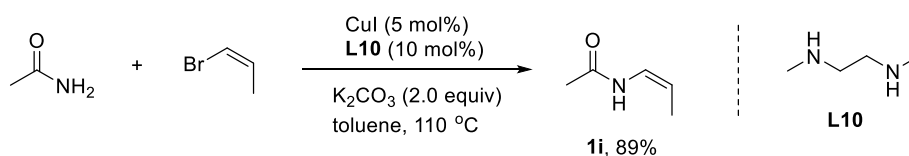

**(*Z*)-*N*-(prop-1-en-1-yl)acetamide (1i).** The preparation of **1i** is according to the literature.<sup>6</sup> Acetamide (1.48 g, 25 mmol, 1.0 equiv), CuI (1.25 mmol, 5 mol%),  $\text{K}_2\text{CO}_3$  (50 mmol, 2.0 equiv), diamine ligand **L10** (2.5 mmol, 0.10 equiv), (*Z*)-1-propenyl bromide (50 mmol, 2.0 equiv), and toluene (35 mL) were added to a 100 mL schlenk tube in glovebox. The reaction was stirred at 110 °C for 24 h. The reaction was cooled to room temperature and filtered through a pad of Celite with EtOAc. The filtrate was concentrated, the residue was purified with silica gel chromatography (Petroleum ether: Ethyl acetate = 5: 1) to afford **1i** (2.2 g, 89% yield) as a white solid. This compound is known.<sup>6</sup> Data for **1i**:  $^1\text{H}$  NMR (400 MHz,  $\text{CDCl}_3$ )  $\delta$  7.04 (br, 1H), 7.60 (t,  $J = 9.2$  Hz, 1H), 4.78 (m, 1H), 2.08 (s, 3H), 1.61 (d,  $J = 7.2$  Hz, 3H).

#### 4. General Procedure for the Ni-Catalyzed Carbodifunctionalization of *N*-Vinylacetamides.

To a 25 mL of Schlenk tube were added *N*-vinylamide **1** (0.4 mmol, 1.0 equiv), arylboronic acid **2** (0.8 mmol, 2.0 equiv),  $\text{Ni}(\text{OTf})_2$  (5 mol %), **L6** (5 mol %) and  $\text{K}_2\text{CO}_3$  (3.0 equiv) under Ar.  $\text{BrCX}_2\text{CO}_2\text{Et}$  (X = F, H) or 2-bromomalonate (0.6 mmol, 1.5 equiv) and dioxane (4 mL) were then



added. The tube was screw-capped and heated to 80 °C (oil bath). After stirring for 8 h, the reaction mixture was cooled to room temperature. The reaction mixture was diluted with ethyl acetate, filtered through a pad of Celite and concentrated. The residue was purified with silica gel chromatography to afford the product.

## 5. Characterization Data of Compounds 4-32.

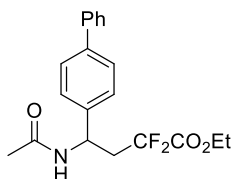

**Ethyl 4-([1,1'-biphenyl]-4-yl)-4-acetamido-2,2-difluorobutanoate (4).** Compound **4** (114 mg, 79% yield) as a white solid (m.p. 161-164 °C) was purified with silica gel chromatography (Petroleum ether: Ethyl acetate = 1: 1). <sup>1</sup>H NMR (400 MHz, CDCl<sub>3</sub>) δ 7.58 – 7.52 (m, 4H), 7.43 (t, *J* = 8.4 Hz, 2H), 7.39 – 7.32 (m, 3H), 6.24 (d, *J* = 7.2 Hz, 1H), 5.40 – 5.32 (m, 1H), 4.18 (q, *J* = 7.2 Hz, 2H), 2.82 – 2.55 (m, 2H), 1.98 (s, 3H), 1.30 (t, *J* = 7.2 Hz, 3H). <sup>19</sup>F NMR (376 MHz, CDCl<sub>3</sub>) δ -102.7 (dt, *J* = 267.0 Hz, 15.0 Hz, 1F), -103.5 (dt, *J* = 267.0 Hz, 15.0 Hz, 1F). <sup>13</sup>C NMR (100 MHz, CDCl<sub>3</sub>) δ 169.2, 163.7 (t, *J* = 32.0 Hz), 140.9, 140.4, 139.4, 128.8, 127.5, 127.4, 127.0, 126.9, 114.9 (t, *J* = 250.0 Hz), 63.1, 47.9 (t, *J* = 5.0 Hz), 40.2 (t, *J* = 22.0 Hz), 23.2, 13.8. MS (ESI): *m/z* (%) 362 (M+H)<sup>+</sup>. HRMS (ESI): Calcd. for C<sub>20</sub>H<sub>22</sub>O<sub>3</sub>NF<sub>2</sub>: 362.1562 (M+H)<sup>+</sup>; Found: 362.1558 (M+H)<sup>+</sup>.

### Gram-Scale Synthesis of Compound 4.

To a 100 mL of Schlenk tube equipped with a magnetic stir bar were added *N*-vinylacetamide **1a** (0.476 g, 5.6 mmol, 1.0 equiv), arylboronic acid **2a** (11.2 mmol, 2.0 equiv), Ni(OTf)<sub>2</sub> (0.28 mmol, 5 mol %), 5,5-*di*CF<sub>3</sub>-2,2'-bipyridine **L6** (0.28 mmol, 5 mol %), and K<sub>2</sub>CO<sub>3</sub> (16.8 mmol, 3.0 equiv) under Ar atmosphere. BrCF<sub>2</sub>CO<sub>2</sub>Et **3a** (8.4 mmol, 1.5 equiv) and anhydrous 1,4-dioxane (56 mL) were then added. The tube was screw capped and heated to 80 °C (oil bath). After stirring for 24 h, the reaction mixture was cooled to room temperature. The reaction mixture was filtered through a pad of Celite and washed with ethyl acetate (3 × 30 mL). The filtrate was concentrated. The residue was subjected to column chromatography on silica gel to give product **4** (1.32 g, 65%).

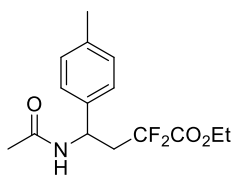

**Ethyl 4-acetamido-2,2-difluoro-4-(p-tolyl)butanoate (5).** Compound **5** (97 mg, 81% yield) as a white solid (m.p. 78-81 °C) was purified with silica gel chromatography (Petroleum ether: Ethyl acetate = 1: 1). <sup>1</sup>H NMR (400 MHz, CDCl<sub>3</sub>) δ 7.17 (d, *J* = 8.0 Hz, 2H), 7.11 (d, *J* = 8.0 Hz, 2H), 6.60 (d, *J* = 8.0 Hz, 1H), 5.29 – 5.22 (m, 1H), 4.14 (q, *J* = 7.2 Hz, 2H), 2.75 – 2.45 (m, 2H), 2.30 (s, 3H), 1.90 (s, 3H), 1.28 (t, *J* = 7.2 Hz, 3H). <sup>19</sup>F NMR (376 MHz, CDCl<sub>3</sub>) δ -102.8 (dt, *J* = 267.0 Hz, 15.0 Hz, 1F), -104.0 (dt, *J* = 267.0 Hz, 15.0 Hz, 1F). <sup>13</sup>C NMR (100 MHz, CDCl<sub>3</sub>) δ 169.3, 163.6 (t, *J* = 32.0 Hz), 137.6, 137.5, 129.3, 126.4, 114.9 (t, *J* = 250.0 Hz), 62.9, 47.7 (t, *J* = 5.0 Hz), 40.2 (t, *J* = 22.0 Hz), 23.0, 21.5, 13.7. MS (ESI): *m/z* (%) 300 (M+H)<sup>+</sup>. HRMS (ESI): Calcd. for C<sub>15</sub>H<sub>20</sub>O<sub>3</sub>NF<sub>2</sub>: 300.1406 (M+H)<sup>+</sup>; Found: 300.1405 (M+H)<sup>+</sup>.

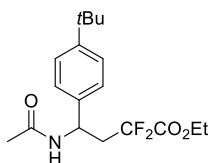

**Ethyl 4-acetamido-4-(4-(tert-butyl)phenyl)-2,2-difluorobutanoate (6).** Compound **6** (85 mg, 62% yield) as a white solid (m.p. 144-146 °C) was purified with silica gel chromatography (Petroleum ether: Ethyl acetate = 1: 1). <sup>1</sup>H NMR (400 MHz, CDCl<sub>3</sub>) δ 7.33 (d, *J* = 8.0 Hz, 2H), 7.21 (d, *J* = 8.0 Hz, 2H), 6.54 (d, *J* = 8.0 Hz, 1H), 5.32 – 5.22 (m, 1H), 4.10 (q, *J* = 7.2 Hz, 2H), 2.76 – 2.48 (m, 2H), 1.91 (s, 3H), 1.28 (s, 9H), 1.26 (t, *J* = 7.2 Hz, 3H). <sup>19</sup>F NMR (376 MHz, CDCl<sub>3</sub>) δ -102.5 (dt, *J* = 267.0 Hz, 15.0 Hz, 1F), -104.1 (dt, *J* = 267.0 Hz, 15.0 Hz, 1F). <sup>13</sup>C NMR (100 MHz, CDCl<sub>3</sub>) δ 169.2, 163.6 (t, *J* = 31.0 Hz), 150.7, 137.4, 126.2, 125.6, 114.9 (t, *J* = 251.0 Hz), 62.9, 47.7 (t, *J* = 4.0 Hz), 40.2 (t, *J* = 22.0 Hz), 34.4, 31.2, 23.1, 13.7. MS (ESI): *m/z* (%) 342 (M+H)<sup>+</sup>. HRMS (ESI): Calcd. for C<sub>18</sub>H<sub>26</sub>O<sub>3</sub>NF<sub>2</sub>: 342.1875 (M+H)<sup>+</sup>; Found: 342.1869 (M+H)<sup>+</sup>.

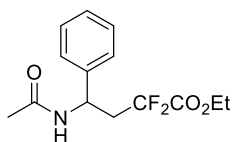

**Ethyl 4-acetamido-2,2-difluoro-4-phenylbutanoate (7).** Compound **7** (105 mg, 92% yield) as a white solid (m.p. 66-67 °C) was purified with silica gel chromatography (Petroleum ether : Ethyl acetate = 1: 1). <sup>1</sup>H NMR (400 MHz, CDCl<sub>3</sub>) δ 7.34 – 7.22 (s, 5H), 6.60 (d, *J* = 8.0 Hz, 1H), 5.33 – 5.25 (m, 1H), 4.14 (q, *J* = 7.2 Hz, 2H), 2.75 – 2.48 (m, 2H), 1.91 (s, 3H), 1.28 (t, *J* = 7.2 Hz, 3H). <sup>19</sup>F NMR (376 MHz, CDCl<sub>3</sub>) δ -102.8 (dt, *J* = 267.0 Hz, 15.0 Hz, 1F), -103.9 (dt, *J* = 267.0 Hz, 15.0 Hz, 1F). <sup>13</sup>C NMR (100 MHz, CDCl<sub>3</sub>) δ 169.3, 163.6 (t, *J* = 32.0 Hz), 140.5, 128.7, 127.8, 126.4, 114.9 (t, *J* = 251.0 Hz), 63.0, 48.0 (t, *J* = 4.0 Hz), 40.2 (t, *J* = 23.0 Hz), 23.0, 13.7. MS (ESI): *m/z* (%) 286 (M+H)<sup>+</sup>. HRMS (ESI): Calcd. for C<sub>14</sub>H<sub>18</sub>O<sub>3</sub>NF<sub>2</sub>: 286.1249 (M+H)<sup>+</sup>; Found: 286.1249 (M+H)<sup>+</sup>.

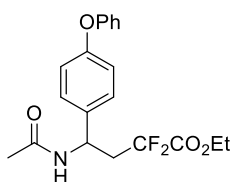

**Ethyl 4-acetamido-2,2-difluoro-4-(4-phenoxyphenyl)butanoate (8).** Compound **8** (101 mg, 67% yield) as a white solid (m.p. 103-105 °C) was purified with silica gel chromatography (Petroleum ether: Ethyl acetate = 1: 1). <sup>1</sup>H NMR (400 MHz, CDCl<sub>3</sub>) δ 7.52 (d, *J* = 8.0 Hz, 1H), 7.27 (t, *J* = 8.0 Hz, 2H), 7.25 (d, *J* = 8.0 Hz, 2H), 7.06 (t, *J* = 8.0 Hz, 1H), 6.93 (d, *J* = 8.0 Hz, 2H), 6.89 (d, *J* = 8.0 Hz, 2H), 5.35 – 5.26 (m, 1H), 4.16 (q, *J* = 7.2 Hz, 2H), 3.74 (s, 3H), 2.76 – 2.44 (m, 2H), 1.91 (s, 3H), 1.26 (t, *J* = 7.2 Hz, 3H). <sup>19</sup>F NMR (376 MHz, CDCl<sub>3</sub>) δ -103.1 (dt, *J* = 263.2 Hz, 15.0 Hz, 1F), -104.5 (dt, *J* = 263.2 Hz, 15.0 Hz, 1F). <sup>13</sup>C NMR (100 MHz, CDCl<sub>3</sub>) δ 169.6, 163.5 (t, *J* = 32.0 Hz), 156.69, 156.67, 135.6, 129.6, 127.9, 123.3, 118.7, 118.6, 114.7 (t, *J* = 251.0 Hz), 62.9, 47.2 (t, *J* = 5.0 Hz), 40.2 (t, *J* = 22.0 Hz), 22.8, 13.6. MS (ESI): *m/z* (%) 378 (M+H)<sup>+</sup>. HRMS (ESI): Calcd. for C<sub>20</sub>H<sub>22</sub>O<sub>4</sub>NF<sub>2</sub>: 378.1511 (M+H)<sup>+</sup>; Found: 378.1505 (M+H)<sup>+</sup>.

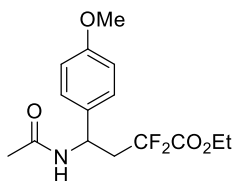

**Ethyl 4-acetamido-2,2-difluoro-4-(4-methoxyphenyl)butanoate (9).** Compound **9** (106 mg, 84% yield) as a white solid (m.p. 86-88 °C) was purified with silica gel chromatography (Petroleum ether: Ethyl acetate = 1: 1). <sup>1</sup>H NMR (400 MHz, CDCl<sub>3</sub>) δ 7.19 (d, *J* = 8.8 Hz, 2H), 6.81 (d, *J* = 8.8 Hz, 2H), 6.74 (d, *J* = 8.0 Hz, 1H), 5.26 – 5.18 (m, 1H), 4.12 (q, *J* = 7.2 Hz, 2H), 3.74 (s, 3H), 2.74 – 2.45 (m, 2H), 1.89 (s, 3H), 1.26 (t, *J* = 7.2 Hz, 3H). <sup>19</sup>F NMR (376 MHz, CDCl<sub>3</sub>) δ -102.8 (dt, *J* = 263.2 Hz, 15.0 Hz, 1F), -104.3 (dt, *J* = 263.2 Hz, 15.0 Hz, 1F). <sup>13</sup>C NMR (100 MHz, CDCl<sub>3</sub>) δ 169.2, 163.6 (t, *J* = 33.0 Hz), 159.0, 132.7, 127.7, 114.9 (t, *J* = 251.0 Hz), 114.0, 62.9, 55.1, 47.4 (t, *J* = 5.0 Hz), 40.2 (t, *J* = 22.0 Hz), 23.0, 13.7. MS (ESI): *m/z* (%) 316 (M+H)<sup>+</sup>. HRMS (ESI): Calcd. for C<sub>15</sub>H<sub>20</sub>O<sub>4</sub>NF<sub>2</sub>: 316.1355 (M+H)<sup>+</sup>; Found: 316.1350 (M+H)<sup>+</sup>.

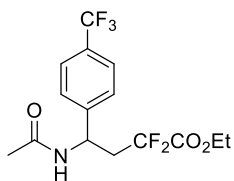

**Ethyl 4-acetamido-2,2-difluoro-4-(4-(trifluoromethyl)phenyl)butanoate (10).** Compound **10** (115 mg, 81% yield) as a white solid (m.p. 108-109 °C) was purified with silica gel chromatography (Petroleum ether: Ethyl acetate = 1: 1). <sup>1</sup>H NMR (400 MHz, CDCl<sub>3</sub>) δ 7.55 (d, *J* = 8.0 Hz, 2H), 7.40 (d, *J* = 8.0 Hz, 2H), 6.94 (d, *J* = 8.0 Hz, 1H), 5.38 – 5.29 (m, 1H), 4.20 (q, *J* = 7.2 Hz, 2H), 2.72 – 2.43 (m, 2H), 1.93 (s, 3H), 1.29 (t, *J* = 7.2 Hz, 3H). <sup>19</sup>F NMR (376 MHz, CDCl<sub>3</sub>) δ -62.7 (s, 3F), -103.2 (dt, *J* = 267.0 Hz, 15.0 Hz, 1F), -104.0 (dt, *J* = 267.0 Hz, 15.0 Hz, 1F). <sup>13</sup>C NMR (100 MHz, CDCl<sub>3</sub>) δ 169.6, 163.5 (t, *J* = 33.0 Hz), 144.9, 130.0 (q, *J* = 32.0 Hz), 126.8, 125.7 (q, *J* = 4.0 Hz), 123.9 (q, *J* = 271.0 Hz), 114.7 (t, *J* = 251.0 Hz), 63.2, 47.8 (t, *J* = 4.0 Hz), 40.0 (t, *J* = 22.0 Hz), 22.9, 13.7. MS (ESI): *m/z* (%) 354 (M+H)<sup>+</sup>. HRMS (ESI): Calcd. for C<sub>15</sub>H<sub>17</sub>O<sub>3</sub>NF<sub>5</sub>: 354.1123 (M+H)<sup>+</sup>; Found: 354.1118 (M+H)<sup>+</sup>.

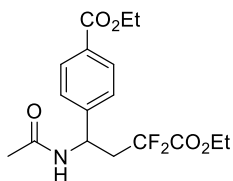

**Ethyl 4-(1-acetamido-4-ethoxy-3,3-difluoro-4-oxobutyl)benzoate (11).** Compound **11** (123 mg, 86% yield) as a colorless oil was purified with silica gel chromatography (Petroleum ether: Ethyl acetate = 1: 1).  $^1\text{H}$  NMR (400 MHz,  $\text{CDCl}_3$ )  $\delta$  7.91 (d,  $J = 8.4$  Hz, 2H), 7.45 (d,  $J = 8.0$  Hz, 1H), 7.33 (d,  $J = 8.4$  Hz, 2H), 5.36 – 5.28 (m, 1H), 4.30 (q,  $J = 7.2$  Hz, 2H), 4.15 (q,  $J = 7.2$  Hz, 2H), 2.70 – 2.40 (m, 2H), 1.89 (s, 3H), 1.32 (t,  $J = 7.2$  Hz, 3H), 1.24 (t,  $J = 7.2$  Hz, 3H).  $^{19}\text{F}$  NMR (376 MHz,  $\text{CDCl}_3$ )  $\delta$  -103.4 (dt,  $J = 267.0$  Hz, 15.0 Hz, 1F), -104.3 (dt,  $J = 267.0$  Hz, 15.0 Hz, 1F).  $^{13}\text{C}$  NMR (100 MHz,  $\text{CDCl}_3$ )  $\delta$  169.7, 166.1, 163.5 (t,  $J = 32.0$  Hz), 145.8, 129.9, 129.8, 126.4, 114.7 (t,  $J = 250.0$  Hz), 63.1, 61.0, 47.8 (t,  $J = 4.0$  Hz), 39.9 (t,  $J = 23.0$  Hz), 22.8, 14.1, 13.7. MS (ESI):  $m/z$  (%) 358 ( $\text{M}+\text{H}$ ) $^+$ . HRMS (ESI): Calcd. for  $\text{C}_{17}\text{H}_{22}\text{O}_5\text{NF}_2$ : 358.1461 ( $\text{M}+\text{H}$ ) $^+$ ; Found: 358.1460 ( $\text{M}+\text{H}$ ) $^+$ .

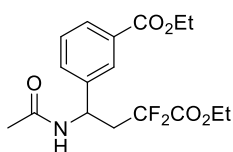

**Ethyl 3-(1-acetamido-4-ethoxy-3,3-difluoro-4-oxobutyl)benzoate (12).** Compound **12** (121 mg, 85% yield) as a colorless oil was purified with silica gel chromatography (Petroleum ether: Ethyl acetate = 1: 1).  $^1\text{H}$  NMR (400 MHz,  $\text{CDCl}_3$ )  $\delta$  7.96 (s, 1H), 7.90 (d,  $J = 8.0$  Hz, 1H), 7.49 (d,  $J = 8.0$  Hz, 1H), 7.35 (t,  $J = 8.0$  Hz, 1H), 6.87 (d,  $J = 8.0$  Hz, 1H), 5.38 – 5.29 (m, 1H), 4.33 (q,  $J = 7.2$  Hz, 2H), 4.17 (q,  $J = 7.2$  Hz, 2H), 2.74 – 2.44 (m, 2H), 1.92 (s, 3H), 1.35 (t,  $J = 7.2$  Hz, 3H), 1.27 (t,  $J = 7.2$  Hz, 3H).  $^{19}\text{F}$  NMR (376 MHz,  $\text{CDCl}_3$ )  $\delta$  -103.1 (dt,  $J = 267.0$  Hz, 15.0 Hz, 1F), -104.0 (dt,  $J = 267.0$  Hz, 15.0 Hz, 1F).  $^{13}\text{C}$  NMR (100 MHz,  $\text{CDCl}_3$ )  $\delta$  169.5, 166.2, 163.5 (t,  $J = 32.0$  Hz), 141.4, 131.2, 130.8, 128.8, 128.7, 127.2, 114.7 (t,  $J = 251.0$  Hz), 63.1, 61.0, 47.7 (t,  $J = 4.0$  Hz), 40.1 (t,  $J = 22.0$  Hz), 22.9, 14.1, 13.6. MS (ESI):  $m/z$  (%) 358 ( $\text{M}+\text{H}$ ) $^+$ . HRMS (ESI): Calcd. for  $\text{C}_{17}\text{H}_{22}\text{O}_5\text{NF}_2$ : 358.1461 ( $\text{M}+\text{H}$ ) $^+$ ; Found: 358.1454 ( $\text{M}+\text{H}$ ) $^+$ .

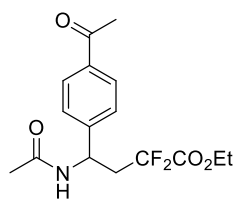

**Ethyl 4-acetamido-4-(4-acetylphenyl)-2,2-difluorobutanoate (13).** Compound **13** (87 mg, 67% yield) as a white solid (m.p. 138-140 °C) was purified with silica gel chromatography (Petroleum ether: Ethyl acetate = 1: 1). <sup>1</sup>H NMR (400 MHz, CDCl<sub>3</sub>) δ 7.88 (d, *J* = 8.0 Hz, 2H), 7.38 (d, *J* = 8.0 Hz, 2H), 6.80 (d, *J* = 8.0 Hz, 1H), 5.38 – 5.29 (m, 1H), 4.21 (q, *J* = 7.2 Hz, 2H), 2.74 – 2.44 (m, 2H), 2.56 (s, 3H), 1.94 (s, 3H), 1.30 (t, *J* = 7.2 Hz, 3H). <sup>19</sup>F NMR (376 MHz, CDCl<sub>3</sub>) δ -103.11 (dt, *J* = 267.0 Hz, 15.0 Hz, 1F), -103.84 (dt, *J* = 267.0 Hz, 15.0 Hz, 1F). <sup>13</sup>C NMR (100 MHz, CDCl<sub>3</sub>) δ 197.6, 169.4, 163.5 (t, *J* = 32.0 Hz), 146.1, 136.5, 128.8, 126.6, 114.7 (t, *J* = 251.0 Hz), 63.2, 47.9 (t, *J* = 4.0 Hz), 39.9 (t, *J* = 23.0 Hz), 26.6, 23.0, 13.8. MS (ESI): *m/z* (%) 328 (M+H)<sup>+</sup>. HRMS (ESI): Calcd. for C<sub>16</sub>H<sub>20</sub>O<sub>4</sub>NF<sub>2</sub>: 328.1355 (M+H)<sup>+</sup>; Found: 328.1350 (M+H)<sup>+</sup>.

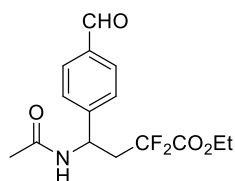

**Ethyl 4-acetamido-2,2-difluoro-4-(4-formylphenyl)butanoate (14).** Compound **14** (53 mg, 42% yield) as a white solid (m.p. 79-82 °C) was purified with silica gel chromatography (Petroleum ether: Ethyl acetate = 1: 1). <sup>1</sup>H NMR (400 MHz, CDCl<sub>3</sub>) δ 9.95 (s, 1H), 7.81 (d, *J* = 8.0 Hz, 2H), 7.46 (d, *J* = 8.0 Hz, 2H), 6.88 (d, *J* = 8.0 Hz, 1H), 5.40 – 5.31 (m, 1H), 4.21 (q, *J* = 7.2 Hz, 2H), 2.74 – 2.45 (m, 2H), 1.94 (s, 3H), 1.29 (t, *J* = 7.2 Hz, 3H). <sup>19</sup>F NMR (376 MHz, CDCl<sub>3</sub>) δ -103.1 (dt, *J* = 270.7 Hz, 18.8 Hz, 1F), -103.86 (dt, *J* = 270.7 Hz, 18.8 Hz, 1F). <sup>13</sup>C NMR (100 MHz, CDCl<sub>3</sub>) δ 191.7, 169.6, 163.5 (t, *J* = 32.0 Hz), 147.6, 135.7, 130.1, 127.1, 114.7 (t, *J* = 251.0 Hz), 63.2, 47.9 (t, *J* = 4.0 Hz), 39.9 (t, *J* = 23.0 Hz), 23.0, 13.8. MS (ESI): *m/z* (%) 314 (M+H)<sup>+</sup>. HRMS (ESI): Calcd. for C<sub>15</sub>H<sub>18</sub>O<sub>4</sub>NF<sub>2</sub>: 314.1198 (M+H)<sup>+</sup>; Found: 314.1197 (M+H)<sup>+</sup>.

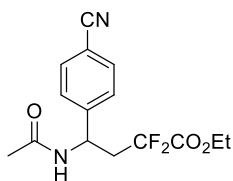

**Ethyl 4-acetamido-4-(4-cyanophenyl)-2,2-difluorobutanoate (15).** Compound **15** (54 mg, 43% yield) as a white solid (m.p. 108-109 °C) was purified with silica gel chromatography (Petroleum ether: Ethyl acetate = 1: 1). <sup>1</sup>H NMR (400 MHz, CDCl<sub>3</sub>) δ 7.60 (d, *J* = 8.0 Hz, 2H), 7.42 (d, *J* = 8.0 Hz, 2H), 7.05 (d, *J* = 7.6 Hz, 1H), 5.37 – 5.26 (m, 1H), 4.23 (q, *J* = 7.2 Hz, 2H), 2.72 – 2.40 (m, 2H), 1.93 (s, 3H), 1.30 (t, *J* = 7.2 Hz, 3H). <sup>19</sup>F NMR (376 MHz, CDCl<sub>3</sub>) δ -103.4 (dt, *J* = 267.0 Hz, 15.0 Hz, 1F), -104.11 (dt, *J* = 267.0 Hz, 15.0 Hz, 1F). <sup>13</sup>C NMR (100 MHz, CDCl<sub>3</sub>) δ 169.6, 163.4 (t, *J* = 32.0 Hz), 146.3, 132.5, 127.2, 118.4, 114.6 (t, *J* = 251.0 Hz), 111.4, 63.9, 47.8 (t, *J* = 4.0 Hz), 39.7 (t, *J* = 23.0 Hz), 22.9, 13.7. MS (ESI): *m/z* (%) 311 (M+H)<sup>+</sup>. HRMS (ESI): Calcd. for C<sub>15</sub>H<sub>17</sub>O<sub>3</sub>N<sub>2</sub>F<sub>2</sub>: 311.1202 (M+H)<sup>+</sup>; Found: 311.1197 (M+H)<sup>+</sup>.

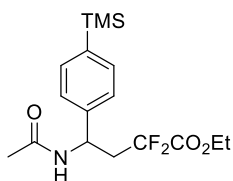

**Ethyl 4-acetamido-2,2-difluoro-4-(4-(trimethylsilyl)phenyl)butanoate (16).** Compound **16** (84 mg, 59% yield) as a white solid (m.p. 112-114 °C) was purified with silica gel chromatography (Petroleum ether: Ethyl acetate = 1: 1). <sup>1</sup>H NMR (400 MHz, CDCl<sub>3</sub>) δ 7.46 (d, *J* = 8.0 Hz, 2H), 7.25 (d, *J* = 8.0 Hz, 2H), 6.30 (d, *J* = 8.0 Hz, 1H), 5.31 – 5.23 (m, 1H), 4.11 (q, *J* = 7.2 Hz, 2H), 2.74 – 2.48 (m, 2H), 1.92 (s, 3H), 1.26 (t, *J* = 7.2 Hz, 3H), 0.22 (s, 9H). <sup>19</sup>F NMR (376 MHz, CDCl<sub>3</sub>) δ -102.6 (dt, *J* = 267.0 Hz, 15.0 Hz, 1F), -103.7 (dt, *J* = 267.0 Hz, 15.0 Hz, 1F). <sup>13</sup>C NMR (100 MHz, CDCl<sub>3</sub>) δ 169.3, 163.6 (t, *J* = 32.0 Hz), 141.0, 140.1, 133.7, 125.8, 114.9 (t, *J* = 250.0 Hz), 63.0, 48.0 (t, *J* = 4.0 Hz), 40.1 (t, *J* = 23.0 Hz), 23.0, 13.7. MS (ESI): *m/z* (%) 358 (M+H)<sup>+</sup>. HRMS (ESI): Calcd. for C<sub>17</sub>H<sub>26</sub>O<sub>3</sub>NF<sub>2</sub>Si: 358.1645 (M+H)<sup>+</sup>; Found: 358.1646 (M+H)<sup>+</sup>.

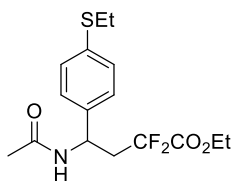

**Ethyl 4-acetamido-4-(4-(ethylthio)phenyl)-2,2-difluorobutanoate (17).** Compound **17** (117 mg, 85% yield) as a white solid (m.p. 82-85 °C) was purified with silica gel chromatography (Petroleum ether: Ethyl acetate = 1: 1). <sup>1</sup>H NMR (400 MHz, CDCl<sub>3</sub>) δ 7.48 (d, *J* = 8.4 Hz, 1H), 7.17 (br, 4H), 5.27 – 5.18 (m, 1H), 4.11 (q, *J* = 7.2 Hz, 2H), 2.86 (q, *J* = 7.2 Hz, 2H), 2.70 – 2.39 (m, 2H), 1.86 (s, 3H), 1.24 (t, *J* = 7.2 Hz, 3H), 1.23 (t, *J* = 7.2 Hz, 3H). <sup>19</sup>F NMR (376 MHz, CDCl<sub>3</sub>) δ -103.2 (dt, *J* = 263.2 Hz, 15.0 Hz, 1F), -104.6 (dt, *J* = 263.2 Hz, 15.0 Hz, 1F). <sup>13</sup>C NMR (100 MHz, CDCl<sub>3</sub>) δ 169.5, 163.4 (t, *J* = 32.0 Hz), 138.2, 136.1, 128.6, 126.9, 114.7 (t, *J* = 250.0 Hz), 62.8, 47.7 (t, *J* = 4.0 Hz), 40.0 (t, *J* = 23.0 Hz), 27.1, 22.7, 14.0, 13.5. MS (ESI): *m/z* (%) 346 (M+H)<sup>+</sup>. HRMS (ESI): Calcd. for C<sub>16</sub>H<sub>22</sub>O<sub>3</sub>NF<sub>2</sub>S: 346.1283 (M+H)<sup>+</sup>; Found: 346.1278 (M+H)<sup>+</sup>.

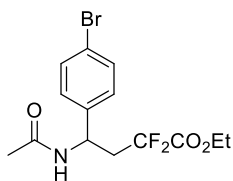

**Ethyl 4-acetamido-4-(4-bromophenyl)-2,2-difluorobutanoate (18).** Compound **18** (99 mg, 68% yield) as a white solid (m.p. 102-105 °C) was purified with silica gel chromatography (Petroleum ether: Ethyl acetate = 1: 1). <sup>1</sup>H NMR (400 MHz, CDCl<sub>3</sub>) δ 7.41 (d, *J* = 8.0 Hz, 2H), 7.15 (d, *J* = 8.0 Hz, 2H), 6.92 (d, *J* = 7.6 Hz, 1H), 5.28 – 5.19 (m, 1H), 4.18 (q, *J* = 7.2 Hz, 2H), 2.70 – 2.41 (m, 2H), 1.91 (s, 3H), 1.29 (t, *J* = 7.2 Hz, 3H). <sup>19</sup>F NMR (376 MHz, CDCl<sub>3</sub>) δ -103.2 (dt, *J* = 267.0 Hz, 15.0 Hz, 1F), -104.1 (dt, *J* = 267.0 Hz, 15.0 Hz, 1F). <sup>13</sup>C NMR (100 MHz, CDCl<sub>3</sub>) δ 169.5, 163.5 (t, *J* = 32.0 Hz), 139.8, 131.8, 128.2, 121.6, 114.7 (t, *J* = 251.0 Hz), 63.1, 47.5 (t, *J* = 4.0 Hz), 40.0 (t, *J* = 23.0 Hz), 22.9, 13.7. MS (ESI): *m/z* (%) 364 (M+H)<sup>+</sup>. HRMS (ESI): Calcd. for C<sub>14</sub>H<sub>17</sub>O<sub>3</sub>NF<sub>2</sub>Br: 364.0354 (M+H)<sup>+</sup>; Found: 364.0351 (M+H)<sup>+</sup>.



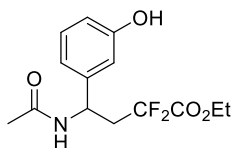

**Ethyl 4-acetamido-2,2-difluoro-4-(3-hydroxyphenyl)butanoate (19).** Compound **19** (70 mg, 58% yield) as a colorless oil was purified with silica gel chromatography (Petroleum ether: Ethyl acetate = 1: 1).  $^1\text{H}$  NMR (400 MHz,  $\text{CDCl}_3$ )  $\delta$  8.57 (s, 1H), 7.10 (t,  $J = 8.0$  Hz, 1H), 6.97 (d,  $J = 8.0$  Hz, 1H), 6.78 (s, 1H), 6.73 (t,  $J = 8.0$  Hz, 2H), 5.28 – 5.18 (m, 1H), 4.20 – 4.12 (m, 2H), 2.71 – 2.43 (m, 2H), 1.98 (s, 3H), 1.26 (t,  $J = 7.2$  Hz, 3H).  $^{19}\text{F}$  NMR (376 MHz,  $\text{CDCl}_3$ )  $\delta$  -102.6 (dt,  $J = 267.0$  Hz, 15.0 Hz, 1F), -104.2 (dt,  $J = 267.0$  Hz, 15.0 Hz, 1F).  $^{13}\text{C}$  NMR (100 MHz,  $\text{CDCl}_3$ )  $\delta$  170.7, 163.8 (t,  $J = 32.0$  Hz), 157.0, 141.7, 130.0, 117.8, 115.3, 114.9 (t,  $J = 250.0$  Hz), 113.5, 63.3, 48.0 (t,  $J = 4.0$  Hz), 40.0 (t,  $J = 23.0$  Hz), 22.7, 13.7. MS (ESI):  $m/z$  (%) 302 ( $\text{M}+\text{H}$ ) $^+$ . HRMS (ESI): Calcd. for  $\text{C}_{14}\text{H}_{18}\text{O}_4\text{NF}_2$ : 302.1198 ( $\text{M}+\text{H}$ ) $^+$ ; Found: 302.1197 ( $\text{M}+\text{H}$ ) $^+$ .

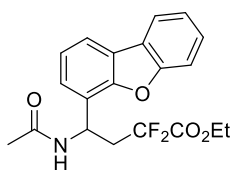

**Ethyl 4-acetamido-4-(dibenzo[b,d]furan-4-yl)-2,2-difluorobutanoate (20).** Compound **20** (54 mg, 36% yield) as a white solid (m.p. 116-118 °C) was purified with silica gel chromatography (Petroleum ether: Ethyl acetate = 1: 1).  $^1\text{H}$  NMR (400 MHz,  $\text{CDCl}_3$ )  $\delta$  7.90 – 7.86 (m, 2H), 7.54 (d,  $J = 8.4$  Hz, 1H), 7.49 (d,  $J = 8.4$  Hz, 1H), 7.44 (td,  $J = 7.6$  Hz, 1.2 Hz, 1H), 7.38 (dd,  $J = 8.4$  Hz, 1.6 Hz, 1H), 7.31 (td,  $J = 7.6$  Hz, 1.2 Hz, 1H), 6.49 (d,  $J = 7.6$  Hz, 1H), 5.52 – 5.44 (m, 1H), 4.14 (q,  $J = 7.2$  Hz, 2H), 2.89 – 2.59 (m, 2H), 1.97 (s, 3H), 1.26 (t,  $J = 7.2$  Hz, 3H).  $^{19}\text{F}$  NMR (376 MHz,  $\text{CDCl}_3$ )  $\delta$  -102.8 (dt,  $J = 267.0$  Hz, 15.0 Hz, 1F), -103.7 (dt,  $J = 267.0$  Hz, 15.0 Hz, 1F).  $^{13}\text{C}$  NMR (100 MHz,  $\text{CDCl}_3$ )  $\delta$  169.3, 163.4 (t,  $J = 32.0$  Hz), 156.5, 155.5, 135.5, 127.4, 125.5, 124.5, 123.7, 122.8, 120.6, 118.8, 114.9 (t,  $J = 250.0$  Hz), 111.9, 111.7, 63.1, 48.2 (t,  $J = 4.0$  Hz), 40.5 (t,  $J = 22.0$  Hz), 23.2, 13.7. MS (ESI):  $m/z$  (%) 376 ( $\text{M}+\text{H}$ ) $^+$ . HRMS (ESI): Calcd. for  $\text{C}_{20}\text{H}_{20}\text{O}_4\text{NF}_2$ : 376.1355 ( $\text{M}+\text{H}$ ) $^+$ ; Found: 376.1356 ( $\text{M}+\text{H}$ ) $^+$ .

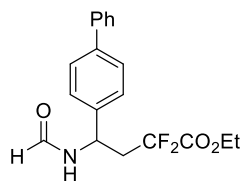

**Ethyl 4-([1,1'-biphenyl]-4-yl)-2,2-difluoro-4-formamidobutanoate (21).** Compound **21** (64 mg, 46% yield) as a white solid (m.p. 134-136 °C) was purified with silica gel chromatography (Petroleum ether: Ethyl acetate = 1: 1). <sup>1</sup>H NMR (400 MHz, CDCl<sub>3</sub>) δ 8.20 (s, 1H), 7.61 – 7.53 (m, 4H), 7.44 (t, *J* = 8.0 Hz, 2H), 7.40 – 7.36 (m, 3H), 5.98 (d, *J* = 7.2 Hz, 1H), 5.48 – 5.40 (m, 1H), 4.21 (q, *J* = 7.2 Hz, 2H), 2.83 – 2.64 (m, 2H), 1.32 (t, *J* = 7.2 Hz, 3H). <sup>19</sup>F NMR (376 MHz, CDCl<sub>3</sub>) δ -102.6 (dt, *J* = 268.3 Hz, 14.0 Hz, 1F), -103.5 (dt, *J* = 268.3 Hz, 15.4 Hz, 1F). <sup>13</sup>C NMR (125 MHz, CDCl<sub>3</sub>) δ 163.6 (t, *J* = 32.1 Hz), 160.2, 141.1, 140.3, 138.8, 128.8, 127.6, 127.5, 127.0, 126.8, 114.8 (t, *J* = 250.5 Hz), 63.3, 46.8 (t, *J* = 4.6 Hz), 40.1 (t, *J* = 22.9 Hz), 13.8. MS (ESI): *m/z* (%) 348 (M+H)<sup>+</sup>. HRMS (ESI): Calcd. for C<sub>19</sub>H<sub>20</sub>O<sub>3</sub>NF<sub>2</sub>: 348.1406 (M+H)<sup>+</sup>; Found: 348.1404 (M+H)<sup>+</sup>.

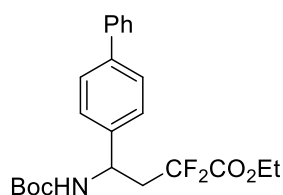

**Ethyl 4-([1,1'-biphenyl]-4-yl)-4-((tert-butoxycarbonyl)amino)-2,2-difluorobutanoate (22).** Compound **22** (105 mg, 63% yield) as a white solid (m.p. 99-101 °C) was purified with silica gel chromatography (Petroleum ether: Ethyl acetate = 4: 1). <sup>1</sup>H NMR (400 MHz, CDCl<sub>3</sub>) δ 7.61 – 7.54 (m, 4H), 7.44 (t, *J* = 7.2 Hz, 2H), 7.40 – 7.33 (m, 3H), 5.03 (br, 2H), 4.25 – 4.18 (m, 2H), 2.87 – 2.50 (m, 2H), 1.43 (s, 9H), 1.32 (t, *J* = 7.2 Hz, 3H). <sup>19</sup>F NMR (376 MHz, CDCl<sub>3</sub>) δ -102.8 (dt, *J* = 268.3, 11.3 Hz, 1F), -104.0 (dt, *J* = 268.3 13.5 Hz, 1F). <sup>13</sup>C NMR (125 MHz, CDCl<sub>3</sub>) δ 163.7 (t, *J* = 32.0 Hz), 154.7, 140.7, 140.5, 140.0, 128.8, 127.4, 127.4, 127.0, 126.6, 114.9 (t, *J* = 251.0 Hz), 79.9, 63.0, 49.2, 40.8 (t, *J* = 22.1 Hz), 28.3, 13.8. MS (ESI): *m/z* (%) 442 (M+Na)<sup>+</sup>. HRMS (ESI): Calcd. for C<sub>23</sub>H<sub>27</sub>O<sub>4</sub>NF<sub>2</sub>Na: 442.1800 (M+Na)<sup>+</sup>; Found: 442.1805 (M+Na)<sup>+</sup>.

### Gram-Scale Synthesis of 22

To a 100 mL of Schlenk tube equipped with a magnetic stir bar were added *tert*-butyl vinylcarbamate **1c** (0.855 g, 6 mmol, 1.0 equiv), arylboronic acid **2a** (12 mmol, 2.0 equiv), Ni(OTf)<sub>2</sub> (0.3 mmol, 5

mol %), 5,5-diCF<sub>3</sub>-2,2'-bipyridine **L6** (0.3 mmol, 5 mol %), K<sub>2</sub>CO<sub>3</sub> (18 mmol, 3.0 equiv) under Ar atmosphere. BrCF<sub>2</sub>CO<sub>2</sub>Et **3a** (9.0 mmol, 1.5 equiv) and anhydrous 1,4-dioxane (60 mL) were then added. The tube was screw capped and heated to 80 °C (oil bath). After stirring for 30 h, the reaction mixture was cooled to room temperature. The reaction mixture was filtered through a pad of Celite and washed with ethyl acetate (3 × 30 mL). The filtrate was concentrated. The residue was subjected to column chromatography on silica gel to give product **22** (1.15 g, 46%).

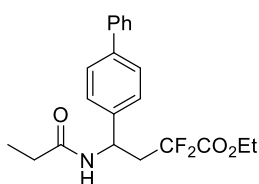

**Ethyl 4-([1,1'-biphenyl]-4-yl)-2,2-difluoro-4-propionamidobutanoate (23).** Compound **23** (118 mg, 78% yield) as a white solid (m.p. 126-129 °C) was purified with silica gel chromatography (Petroleum ether: Ethyl acetate = 1: 1). <sup>1</sup>H NMR (400 MHz, CDCl<sub>3</sub>) δ 7.60 – 7.52 (m, 4H), 7.43 (t, *J* = 7.6 Hz, 2H), 7.40 – 7.32 (m, 3H), 6.07 (d, *J* = 8.0 Hz, 1H), 5.42 – 5.32 (m, 1H), 4.19 (q, *J* = 7.2 Hz, 2H), 2.84 – 2.57 (m, 2H), 2.22 (q, *J* = 7.6 Hz, 2H), 1.31 (t, *J* = 7.2 Hz, 3H), 1.15 (t, *J* = 7.6 Hz, 3H). <sup>19</sup>F NMR (376 MHz, CDCl<sub>3</sub>) δ -102.5 (dt, *J* = 267.0 Hz, 15.0 Hz, 1F), -103.3 (dt, *J* = 267.0 Hz, 15.0 Hz, 1F). <sup>13</sup>C NMR (100 MHz, CDCl<sub>3</sub>) δ 173.0, 163.6 (t, *J* = 32.0 Hz), 140.7, 140.4, 139.4, 128.7, 127.4, 127.3, 126.9, 126.8, 117.9 (t, *J* = 251.0 Hz), 63.0, 47.7 (t, *J* = 5.0 Hz), 40.2 (t, *J* = 23.0 Hz), 29.5, 13.7, 9.5. MS (ESI): *m/z* (%) 376 (M+H)<sup>+</sup>. HRMS (ESI): Calcd. for C<sub>21</sub>H<sub>24</sub>O<sub>3</sub>NF<sub>2</sub>: 376.1719 (M+H)<sup>+</sup>; Found: 376.1713 (M+H)<sup>+</sup>.

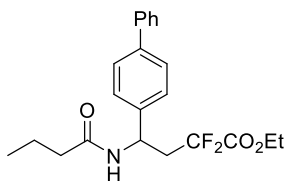

**Ethyl 4-([1,1'-biphenyl]-4-yl)-4-butyramido-2,2-difluorobutanoate (24).** Compound **24** (110 mg, 70% yield) as a white solid (m.p. 104-106 °C) was purified with silica gel chromatography (Petroleum ether: Ethyl acetate = 1: 1). <sup>1</sup>H NMR (400 MHz, CDCl<sub>3</sub>) δ 7.60 – 7.53 (m, 4H), 7.44 (t, *J* = 7.6 Hz, 2H), 7.39 – 7.32 (m, 3H), 5.90 (d, *J* = 7.2 Hz, 1H), 5.42 – 5.32 (m, 1H), 4.20 (q, *J* = 7.2 Hz, 2H), 2.84 – 2.56 (m, 2H), 2.17 (t, *J* = 7.2 Hz, 2H), 1.73 – 1.61 (m, 2H), 1.31 (t, *J* = 7.2 Hz, 3H),

0.94 (t,  $J = 7.6$  Hz, 3H).  $^{19}\text{F}$  NMR (376 MHz,  $\text{CDCl}_3$ )  $\delta$  -102.4 (dt,  $J = 267.0$  Hz, 15.0 Hz, 1F), -104.0 (dt,  $J = 267.0$  Hz, 15.0 Hz, 1F).  $^{13}\text{C}$  NMR (100 MHz,  $\text{CDCl}_3$ )  $\delta$  172.2, 163.6 (t,  $J = 32.0$  Hz), 140.6, 140.4, 139.8, 128.7, 126.53, 126.51, 126.9, 126.8, 114.9 (t,  $J = 251.0$  Hz), 63.0, 47.6 (t,  $J = 5.0$  Hz), 40.2 (t,  $J = 22.0$  Hz), 38.4, 18.9, 13.7, 13.6. MS (ESI):  $m/z$  (%) 390 (M+H) $^+$ . HRMS (ESI): Calcd. for  $\text{C}_{22}\text{H}_{26}\text{O}_3\text{NF}_2$ : 390.1875 (M+H) $^+$ ; Found: 390.1870 (M+H) $^+$ .

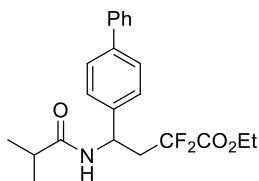

**Ethyl 4-([1,1'-biphenyl]-4-yl)-2,2-difluoro-4-isobutyramidobutanoate (25).** Compound **25** (138 mg, 88% yield) as a white solid (m.p. 127-128 °C) was purified with silica gel chromatography (Petroleum ether: Ethyl acetate = 1: 1).  $^1\text{H}$  NMR (400 MHz,  $\text{CDCl}_3$ )  $\delta$  7.55 (d,  $J = 8.0$  Hz, 4H), 7.43 (t,  $J = 7.6$  Hz, 2H), 7.39 – 7.31 (m, 3H), 6.35 (d,  $J = 7.6$  Hz, 1H), 5.42 – 5.33 (m, 1H), 4.19 (q,  $J = 7.2$  Hz, 2H), 2.81 – 2.55 (m, 2H), 2.44 – 2.32 (m, 1H), 1.30 (t,  $J = 7.2$  Hz, 3H), 1.17 (d,  $J = 6.8$  Hz, 3H), 1.13 (d,  $J = 6.8$  Hz, 3H).  $^{19}\text{F}$  NMR (376 MHz,  $\text{CDCl}_3$ )  $\delta$  -102.2 (dt,  $J = 267.0$  Hz, 15.0 Hz, 1F), -103.7 (dt,  $J = 267.0$  Hz, 15.0 Hz, 1F).  $^{13}\text{C}$  NMR (100 MHz,  $\text{CDCl}_3$ )  $\delta$  176.1, 163.6 (t,  $J = 32.0$  Hz), 140.6, 140.4, 139.8, 128.7, 127.4, 127.3, 126.9, 126.7, 115.0 (t,  $J = 251.0$  Hz), 63.1, 47.6 (t,  $J = 5.0$  Hz), 40.2 (t,  $J = 23.0$  Hz), 35.4, 19.31, 19.29, 13.8. MS (ESI):  $m/z$  (%) 390 (M+H) $^+$ . HRMS (ESI): Calcd. for  $\text{C}_{22}\text{H}_{26}\text{O}_3\text{NF}_2$ : 390.1875 (M+H) $^+$ ; Found: 390.1869 (M+H) $^+$ .

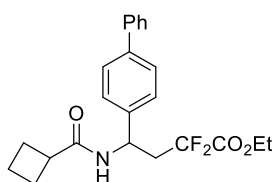

**Ethyl 4-([1,1'-biphenyl]-4-yl)-4-(cyclobutanecarboxamido)-2,2-difluorobutanoate (26).** Compound **26** (138 mg, 86% yield) as a white solid (m.p. 115-118 °C) was purified with silica gel chromatography (Petroleum ether: Ethyl acetate = 1: 1).  $^1\text{H}$  NMR (400 MHz,  $\text{CDCl}_3$ )  $\delta$  7.55 (d,  $J = 8.0$  Hz, 4H), 7.43 (t,  $J = 7.6$  Hz, 2H), 7.39 – 7.31 (m, 3H), 6.21 (d,  $J = 7.6$  Hz, 1H), 5.43 – 5.33 (m, 1H), 4.18 (q,  $J = 7.2$  Hz, 2H), 3.01 (m, 1 H), 2.82 – 2.55 (m, 2H), 2.35 – 2.19 (m, 2H), 2.18 – 2.05 (m, 2H), 2.01 – 1.79 (m, 2H), 1.30 (td,  $J = 7.2$  Hz, 1.2 Hz, 3H).  $^{19}\text{F}$  NMR (376 MHz,  $\text{CDCl}_3$ )  $\delta$

-102.4 (dt,  $J = 267.0$  Hz, 15.0 Hz, 1F), -103.6 (dt,  $J = 267.0$  Hz, 15.0 Hz, 1F).  $^{13}\text{C}$  NMR (100 MHz,  $\text{CDCl}_3$ )  $\delta$  174.1, 163.7 (t,  $J = 31.0$  Hz), 140.7, 140.4, 139.7, 128.7, 127.43, 127.36, 127.0, 126.8, 115.0 (t,  $J = 251.0$  Hz), 63.1, 47.6 (t,  $J = 4.0$  Hz), 40.2 (t,  $J = 23.0$  Hz), 39.7, 25.1, 25.0, 18.1, 13.8. MS (ESI):  $m/z$  (%) 402 (M+H) $^+$ . HRMS (ESI): Calcd. for  $\text{C}_{23}\text{H}_{26}\text{O}_3\text{NF}_2$ : 402.1875 (M+H) $^+$ ; Found: 402.1870 (M+H) $^+$ .

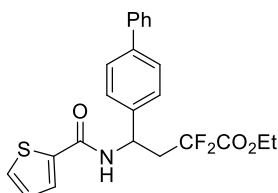

**Ethyl 4-([1,1'-biphenyl]-4-yl)-2,2-difluoro-4-(thiophene-2-carboxamido)butanoate (27).**

Compound **27** (145 mg, 85% yield) as a white solid (m. p. 81- 84 °C) was purified with silica gel chromatography (Petroleum ether: Ethyl acetate = 1: 1).  $^1\text{H}$  NMR (400 MHz,  $\text{CDCl}_3$ )  $\delta$  7.58 (d,  $J = 7.6$  Hz, 1H), 7.53 (d,  $J = 7.6$  Hz, 4H), 7.48 – 7.39 (m, 5H), 7.34 (t,  $J = 7.2$  Hz, 1H), 7.10 (d,  $J = 8.0$  Hz, 1H), 7.01 (t,  $J = 7.2$  Hz, 1H), 5.61 – 5.52 (m, 1H), 4.13 (t,  $J = 7.6$  Hz, 2H), 3.01 – 2.84 (m, 1H), 2.79 – 2.63 (m, 1H), 1.24 (t,  $J = 7.2$  Hz, 3H).  $^{19}\text{F}$  NMR (376 MHz,  $\text{CDCl}_3$ )  $\delta$  -102.1 (dt,  $J = 267.0$  Hz, 15.0 Hz, 1F), -103.9 (dt,  $J = 267.0$  Hz, 15.0 Hz, 1F).  $^{13}\text{C}$  NMR (100 MHz,  $\text{CDCl}_3$ )  $\delta$  163.9 (t,  $J = 32.0$  Hz), 161.2, 140.7, 140.4, 139.4, 138.4, 130.4, 128.7, 128.4, 127.6, 127.4, 127.3, 126.92, 126.86, 115.0 (t,  $J = 251.0$  Hz), 63.2, 48.2 (t,  $J = 5.0$  Hz), 40.1 (t,  $J = 23.0$  Hz), 13.6. MS (ESI):  $m/z$  (%) 430 (M+H) $^+$ . HRMS (ESI): Calcd. for  $\text{C}_{23}\text{H}_{22}\text{O}_3\text{NF}_2\text{S}$ : 430.1283 (M+H) $^+$ ; Found: 430.1277 (M+H) $^+$ .

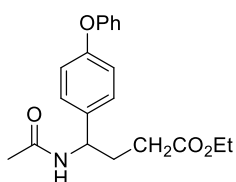

**Ethyl 4-acetamido-4-(4-phenoxyphenyl)butanoate (28).** Compound **28** (66 mg, 48% yield) as a white solid (m.p. 95-97 °C) was purified with silica gel chromatography (Petroleum ether: Ethyl acetate = 1: 1).  $^1\text{H}$  NMR (400 MHz,  $\text{CDCl}_3$ )  $\delta$  7.32 (t,  $J = 8.4$  Hz, 2H), 7.23 (d,  $J = 8.4$  Hz, 2H), 7.09 (t,  $J = 7.6$  Hz, 1H), 6.98 (d,  $J = 7.6$  Hz, 2H), 6.94 (d,  $J = 8.4$  Hz, 2H), 6.28 (d,  $J = 8.4$  Hz, 1H), 4.99 – 4.91 (m, 1H), 4.11 (q,  $J = 7.2$  Hz, 2H), 2.41 – 2.26 (m, 2H), 2.19 – 2.00 (m, 2H), 1.96 (s, 3H), 1.24 (t,  $J = 7.2$  Hz, 3H).  $^{13}\text{C}$  NMR (100 MHz,  $\text{CDCl}_3$ )  $\delta$  173.5, 169.4, 156.9, 156.6, 136.4, 129.7, 127.8,

124.3, 118.9, 118.8, 60.6, 52.6, 31.2, 30.8, 23.3, 14.1. MS (ESI):  $m/z$  (%) 364 ( $M+Na$ )<sup>+</sup>. HRMS (ESI): Calcd. for  $C_{21}H_{22}O_4NF_2$ : 342.1700 ( $M+H$ )<sup>+</sup>; Found: 342.1697 ( $M+H$ )<sup>+</sup>.

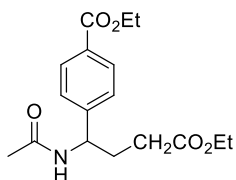

**Ethyl 4-(1-acetamido-4-ethoxy-4-oxobutyl)benzoate (29).** Compound **29** (69 mg, 53% yield) as a colorless oil was purified with silica gel chromatography (Petroleum ether: Ethyl acetate = 1: 1). <sup>1</sup>H NMR (400 MHz, CDCl<sub>3</sub>)  $\delta$  7.95 (d,  $J$  = 8.0 Hz, 2H), 7.31 (d,  $J$  = 8.0 Hz, 2H), 6.76 (d,  $J$  = 8.0 Hz, 1H), 5.02 – 4.93 (m, 1H), 4.32 (q,  $J$  = 7.2 Hz, 2H), 4.08 (q,  $J$  = 7.2 Hz, 2H), 2.38 – 2.22 (m, 2H), 2.11 – 2.00 (m, 2H), 1.93 (s, 3H), 1.34 (t,  $J$  = 7.2 Hz, 3H), 1.21 (t,  $J$  = 7.2 Hz, 3H). <sup>13</sup>C NMR (100 MHz, CDCl<sub>3</sub>)  $\delta$  173.3, 169.7, 166.2, 146.9, 129.8, 129.5, 126.3, 60.9, 60.6, 52.9, 31.0, 30.6, 23.1, 14.2, 14.1. MS (ESI):  $m/z$  (%) 344 ( $M+Na$ )<sup>+</sup>. HRMS (ESI): Calcd. for  $C_{21}H_{22}O_4NF_2$ : 322.1649 ( $M+H$ )<sup>+</sup>; Found: 322.1649 ( $M+H$ )<sup>+</sup>.

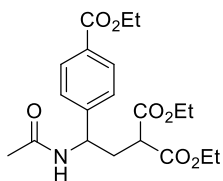

**Diethyl 2-(2-acetamido-2-(4-(ethoxycarbonyl)phenyl)ethyl)malonate (30).** Compound **30** (91 mg, 58% yield) as a colorless oil was purified with silica gel chromatography (Petroleum ether: Ethyl acetate = 1: 1). <sup>1</sup>H NMR (400 MHz, CDCl<sub>3</sub>)  $\delta$  7.94 (d,  $J$  = 8.0 Hz, 2H), 7.32 (d,  $J$  = 8.0 Hz, 2H), 6.69 (d,  $J$  = 8.4 Hz, 1H), 5.09 – 5.00 (m, 1H), 4.32 (q,  $J$  = 7.2 Hz, 2H), 4.20 – 4.01 (m, 4H), 3.36 (t,  $J$  = 7.2 Hz, 1H), 2.39 – 2.25 (m, 2H), 1.91 (s, 3H), 1.34 (t,  $J$  = 7.2 Hz, 3H), 1.22 (t,  $J$  = 7.6 Hz, 3H), 1.21 (t,  $J$  = 7.6 Hz, 3H). <sup>13</sup>C NMR (100 MHz, CDCl<sub>3</sub>)  $\delta$  169.6, 169.2, 168.8, 166.1, 146.5, 129.9, 129.6, 126.3, 61.68, 61.67, 60.8, 51.5, 49.3, 34.6, 23.0, 14.2, 13.9, 13.8. MS (ESI):  $m/z$  (%) 416 ( $M+Na$ )<sup>+</sup>. HRMS (ESI): Calcd. for  $C_{21}H_{22}O_4NF_2$ : 394.1854 ( $M+H$ )<sup>+</sup>; Found: 394.1860 ( $M+H$ )<sup>+</sup>.

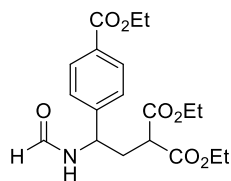

**Diethyl 2-(2-(4-(ethoxycarbonyl)phenyl)-2-formamidoethyl)malonate (31).** Compound **31** (88 mg, 58% yield) as a colorless oil was purified with silica gel chromatography (Petroleum ether: Ethyl acetate = 1: 1).  $^1\text{H}$  NMR (400 MHz,  $\text{CDCl}_3$ )  $\delta$  8.22 (s, 1H), 8.02 (d,  $J = 8.4$  Hz, 2H), 7.37 (d,  $J = 8.0$  Hz, 2H), 6.25 (d,  $J = 9.2$  Hz, 1H), 5.25 – 5.14 (m, 1H), 4.37 (q,  $J = 6.8$  Hz, 2H), 4.19 (q,  $J = 6.8$  Hz, 4H), 3.39 (t,  $J = 6.8$  Hz, 1H), 2.41 (t,  $J = 7.2$  Hz, 2H), 1.38 (t,  $J = 7.2$  Hz, 3H), 1.28 (t,  $J = 7.2$  Hz, 3H), 1.26 (t,  $J = 7.2$  Hz, 3H).  $^{13}\text{C}$  NMR (100 MHz,  $\text{CDCl}_3$ )  $\delta$  169.1, 168.7, 166.1, 160.8, 145.8, 129.9, 129.8, 126.3, 61.8, 61.7, 60.9, 50.1, 49.2, 34.6, 14.2, 13.9, 13.8. MS (ESI):  $m/z$  (%) 402 ( $\text{M}+\text{Na}$ ) $^+$ . HRMS (ESI): Calcd. for  $\text{C}_{19}\text{H}_{26}\text{O}_7\text{N}$ : 380.1704 ( $\text{M}+\text{H}$ ) $^+$ ; Found: 380.1702 ( $\text{M}+\text{H}$ ) $^+$ .

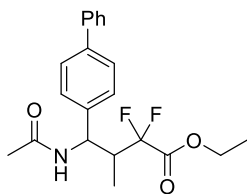

**Ethyl 4-([1,1'-biphenyl]-4-yl)-4-acetamido-2,2-difluoro-3-methylbutanoate (32).** Compound **32** (87 mg, 58% yield, dr = 13:1 determined by  $^{19}\text{F}$  NMR before column chromatography) as a white solid (m.p. 167-169 °C) was purified with silica gel chromatography (Petroleum ether: Ethyl acetate = 2: 1).  $^1\text{H}$  NMR (400 MHz,  $\text{CDCl}_3$ )  $\delta$  7.56 (d,  $J = 8.4$  Hz, 4H), 7.43 (t,  $J = 7.6$  Hz, 2H), 7.38 – 7.28 (m, 3H), 5.98 (d,  $J = 8.4$  Hz, 1H), 5.45 (dd,  $J = 8.8$  Hz, 4.4 Hz, 1H), 4.31 – 4.21 (m, 2H), 2.93 – 2.77 (m, 1H), 2.07 (s, 3H), 1.34 (t,  $J = 7.2$  Hz, 3H), 1.08 (d,  $J = 7.2$  Hz, 3H).  $^{19}\text{F}$  NMR (376 MHz,  $\text{CDCl}_3$ )  $\delta$  -107.1 (dd,  $J = 263.6$  Hz, 13.9 Hz, 1F), -112.1 (dd,  $J = 263.6$  Hz, 15.8 Hz, 1F).  $^{13}\text{C}$  NMR (100 MHz,  $\text{CDCl}_3$ )  $\delta$  169.4, 163.7 (t,  $J = 32.4$  Hz), 140.5, 138.6, 136.2, 128.8, 127.4, 127.3, 127.0, 126.9, 116.7 (t,  $J = 253.1$  Hz), 63.1, 51.1 (t,  $J = 2.0$  Hz), 42.7 (t,  $J = 20.9$  Hz), 23.3, 13.8, 7.5 (t,  $J = 4.1$  Hz). MS (ESI):  $m/z$  (%) 376 ( $\text{M}+\text{H}$ ) $^+$ . HRMS (ESI): Calcd. for  $\text{C}_{21}\text{H}_{24}\text{O}_3\text{NF}_2$ : 376.1719 ( $\text{M}+\text{H}$ ) $^+$ ; Found: 398.1536 ( $\text{M}+\text{Na}$ ) $^+$ .

## 6. Transformations of *N*-Protected $\alpha,\alpha$ -Difluoro- $\gamma$ -Amino Acid Esters.

### Deprotection of compound **4**

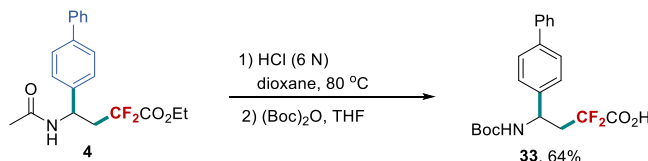

**Procedure:** Compound **4** (180 mg, 0.5 mmol) in a 25 mL Schlenk tube was treated with a solution of 6 N HCl/dioxane (4.5 mL, v/v = 2:1). The schlenk tube was screw-capped and the reaction mixture was then heated to 80 °C. After stirring for 60 hours, the reaction mixture was concentrated. The residue was dissolved in a solution of DMAP (0.05 equiv, 0.025 mmol) in THF (10 mL). Then, a solution of  $\text{Boc}_2\text{O}$  (1.2 equiv, 0.6 mmol) in THF (2 mL) was added dropwise for 2 hours. A solution of 1.2 N HCl (1.0 mL) was slowly added to the reaction mixture at 0 °C and to adjust the pH to 1-2. The reaction mixture was extracted with EtOAc ( $3 \times 20$  mL), the organic phase was dried over  $\text{MgSO}_4$ , filtered, concentrated and purified by column chromatography (Dichloromethane: Methanol = 5: 1) to give **33** (125 mg, 64% yield) as a white solid (m. p. 130-132 °C). Data for compound **33**:  $^1\text{H}$  NMR (500 MHz,  $\text{CDCl}_3$ )  $\delta$  7.64 – 7.58 (m, 4H), 7.46 (t,  $J = 7.5$  Hz, 2H), 7.42 – 7.34 (m, 3H), 5.04 (t,  $J = 10.5$  Hz, 1H), 3.00 – 2.84 (m, 1H), 2.50 – 2.40 (m, 1H), 1.46 (s, 9H).  $^{19}\text{F}$  NMR (471 MHz,  $\text{CDCl}_3$ )  $\delta$  -99.4 (dd,  $J = 256.7, 11.3$  Hz, 1F), -112.8 (dd,  $J = 256.7, 25.4$  Hz, 1F).  $^{13}\text{C}$  NMR (125 MHz,  $\text{CDCl}_3$ )  $\delta$  168.8 (t,  $J = 29.9$  Hz), 157.9, 140.8, 140.5, 140.1, 128.8, 127.6, 127.5, 127.1, 126.3, 114.9 (dd,  $J = 258.3, 241.9$  Hz), 83.1, 50.3 (dd,  $J = 11.3, 1.5$  Hz), 41.8 (t,  $J = 26.3$  Hz), 28.1. MS (ESI):  $m/z$  (%) 414 ( $\text{M}+\text{Na}$ ) $^+$ . HRMS (ESI): Calcd. for  $\text{C}_{21}\text{H}_{24}\text{O}_4\text{NF}_2$ : 392.1668 ( $\text{M}+\text{H}$ ) $^+$ ; Found: 414.1490 ( $\text{M}+\text{Na}$ ) $^+$ .

### Synthesis of dipeptide **34**

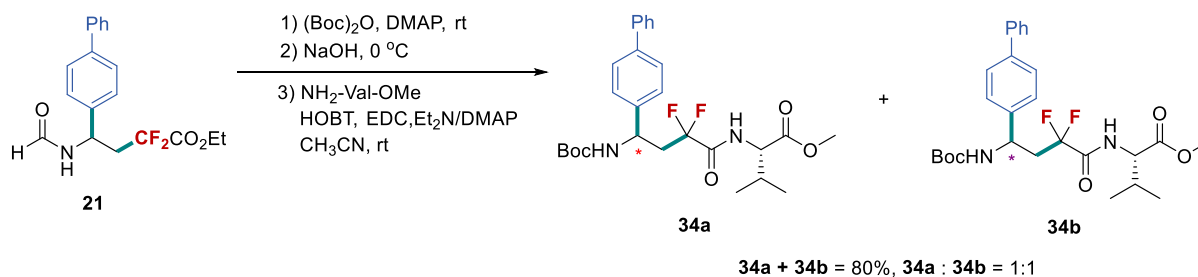

**Procedure:** Compound **21** (1.0 equiv, 1 mmol) was added to a solution of DMAP (0.05 equiv, 0.05 mmol) in THF (2 mL) at rt. Then, a solution of  $\text{Boc}_2\text{O}$  (1.2 equiv, 1.2 mmol) in THF (5 mL) was



added slowly. After the consumption of compound **21** monitored by TLC, a solution of NaOH (1.2 equiv, 1.2 mmol, 3 mL H<sub>2</sub>O) was added at 0 °C. The resulting mixture was stirred at 0 °C for 4 h. The organic solvent was concentrated, the residue was extracted with EtOAc (3 × 10 mL). The organic phase was dried over MgSO<sub>4</sub>, filtered, and concentrated. The residue was used for the next step without purification. The residue was dissolved in CH<sub>3</sub>CN (8 mL). NEt<sub>3</sub> (4 equiv), HOBt (1.5 equiv) and EDC (1.5 equiv) were then added at 0 °C. The resulting mixture was allowed to warm to room temperature and stirred overnight. The reaction mixture was diluted with EtOAc (25 mL), washed with saturated NH<sub>4</sub>Cl (7 mL), brine (7 mL), dried over MgSO<sub>4</sub>, filtered, and concentrated. The crude product was purified by column chromatography (Petroleum ether: Ethyl acetate = 5: 1) to give **34a** (207 mg, 41% yield) as a white solid (m.p. 131-133 °C) and **34b** (198 mg, 39% yield) as a white solid (m.p. 131-133 °C).

Data for compound **34a**: <sup>1</sup>H NMR (400 MHz, CDCl<sub>3</sub>) δ 7.61 – 7.52 (m, 4H), 7.43 (t, *J* = 7.2 Hz, 2H), 7.40 – 7.29 (m, 4H), 5.14 (s, 2H), 4.56 (dd, *J* = 8.4 Hz, 4.8 Hz, 1H), 3.72 (s, 3H), 2.81 – 2.49 (m, 2H), 2.33 – 2.19 (m, 1H), 1.41 (s, 9H), 0.97 (d, *J* = 6.4 Hz, 6H). <sup>19</sup>F NMR (376 MHz, CDCl<sub>3</sub>) δ -102.2 (dt, *J* = 263.6, 11.7 Hz, 1F), -104.8 (dt, *J* = 263.6, 14.7 Hz, 1F). <sup>13</sup>C NMR (125 MHz, CDCl<sub>3</sub>) δ 171.2, 164.0 (t, *J* = 29.1 Hz), 155.1, 140.4, 140.2, 128.7, 127.4, 127.3, 126.9, 126.5, 116.8 (t, *J* = 252.8 Hz), 79.8, 57.5, 52.2, 49.1, 40.2 (t, *J* = 24.4 Hz), 30.8, 28.2, 18.8, 17.7. MS (ESI): *m/z* (%) 527 (M+Na)<sup>+</sup>. HRMS (ESI): Calcd. for C<sub>27</sub>H<sub>35</sub>O<sub>5</sub>N<sub>2</sub>F<sub>2</sub>: 505.2509 (M+H)<sup>+</sup>; Found: 505.2505 (M+H)<sup>+</sup>.

Data for compound **34b**: <sup>1</sup>H NMR (400 MHz, CDCl<sub>3</sub>) δ 7.62 – 7.52 (m, 4H), 7.42 (t, *J* = 7.6 Hz, 2H), 7.39 – 7.32 (m, 3H), 7.12 (br, 1H), 5.25 (d, *J* = 7.6 Hz, 1H), 5.04 (s, 1H), 4.55 (dd, *J* = 8.4 Hz, 4.8 Hz, 1H), 3.76 (s, 3H), 2.81 – 2.54 (m, 2H), 2.30 – 2.17 (m, 1H), 1.41 (s, 9H), 0.97 (d, *J* = 5.6 Hz, 3H), 0.95 (d, *J* = 5.2 Hz, 3H). <sup>19</sup>F NMR (376 MHz, CDCl<sub>3</sub>) δ -102.6 (dt, *J* = 263.2, 12.8 Hz, 1F), -104.3 (dt, *J* = 263.2, 13.2 Hz, 1F). <sup>13</sup>C NMR (125 MHz, CDCl<sub>3</sub>) δ 171.1, 163.7 (t, *J* = 28.5 Hz), 154.8, 140.45, 140.42, 128.7, 127.4, 127.2, 126.9, 126.4, 116.8 (t, *J* = 252.5 Hz), 79.6, 57.3, 52.3, 49.1, 39.8 (t, *J* = 22.1 Hz), 31.3, 28.2, 18.6, 17.7. MS (ESI): *m/z* (%) 527 (M+Na)<sup>+</sup>. HRMS (ESI): Calcd. for C<sub>27</sub>H<sub>35</sub>O<sub>5</sub>N<sub>2</sub>F<sub>2</sub>: 505.2509 (M+H)<sup>+</sup>; Found: 505.2506 (M+H)<sup>+</sup>.



## 8. Copies of $^1\text{H}$ and $^{13}\text{C}$ NMR Spectra of Compound 1g.

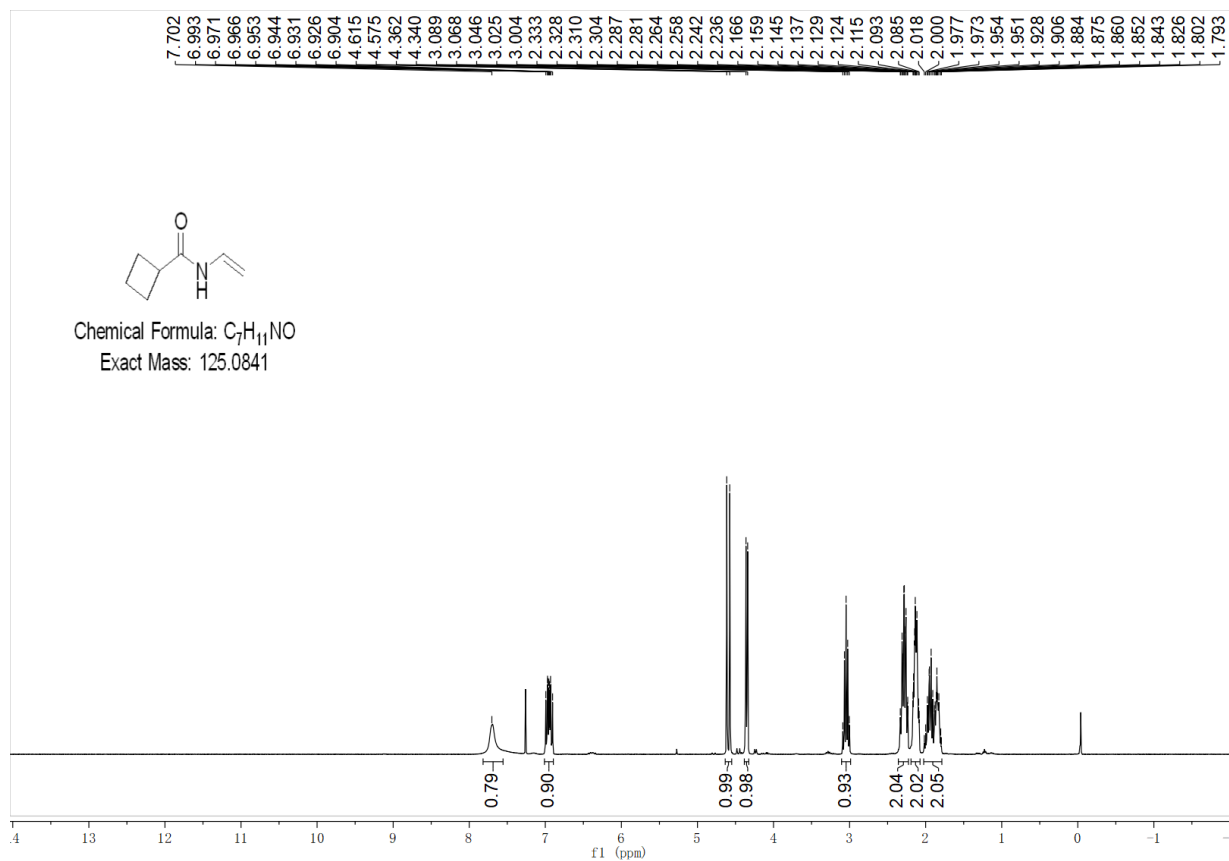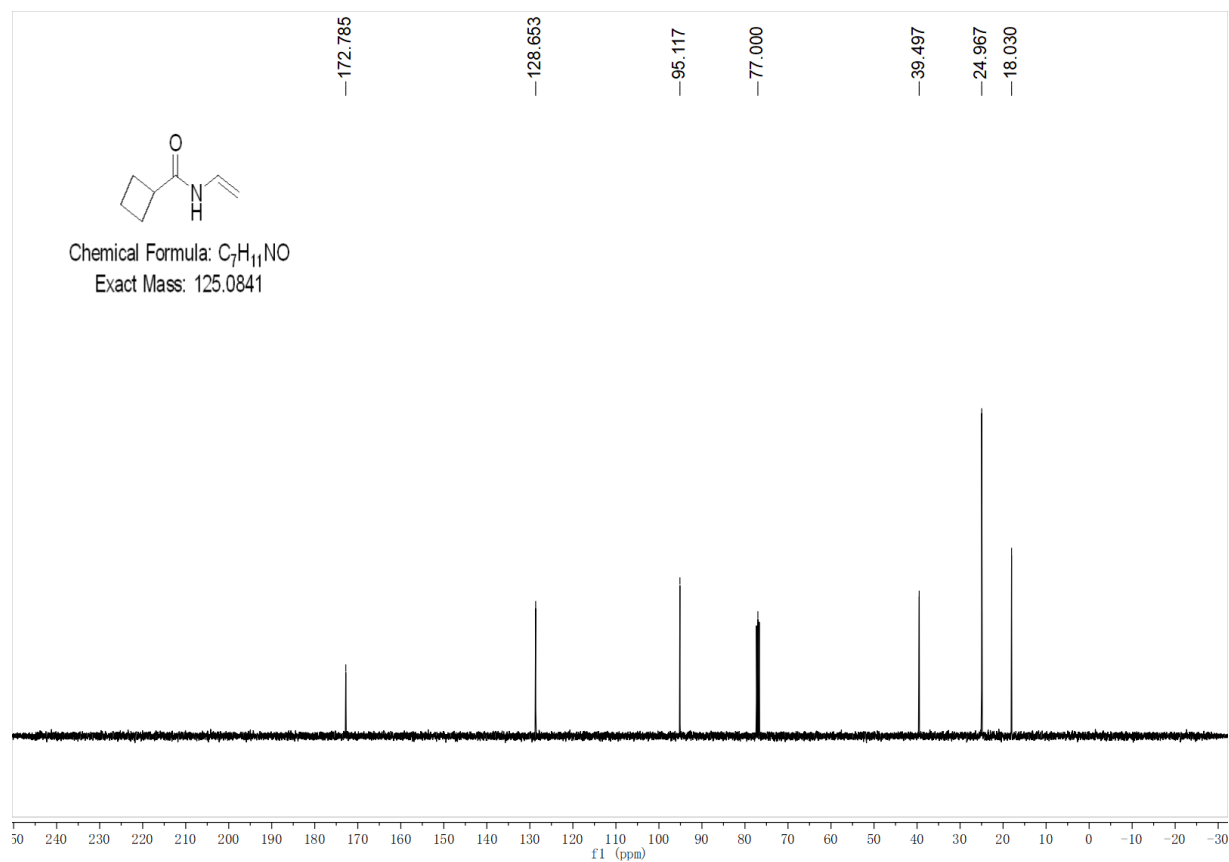

9. Copies of  $^1\text{H}$ NMR,  $^{13}\text{C}$  NMR, and  $^{19}\text{F}$  NMR Spectra of Compounds 4-32.

Ethyl 4-([1,1'-biphenyl]-4-yl)-4-acetamido-2,2-difluorobutanoate (4)

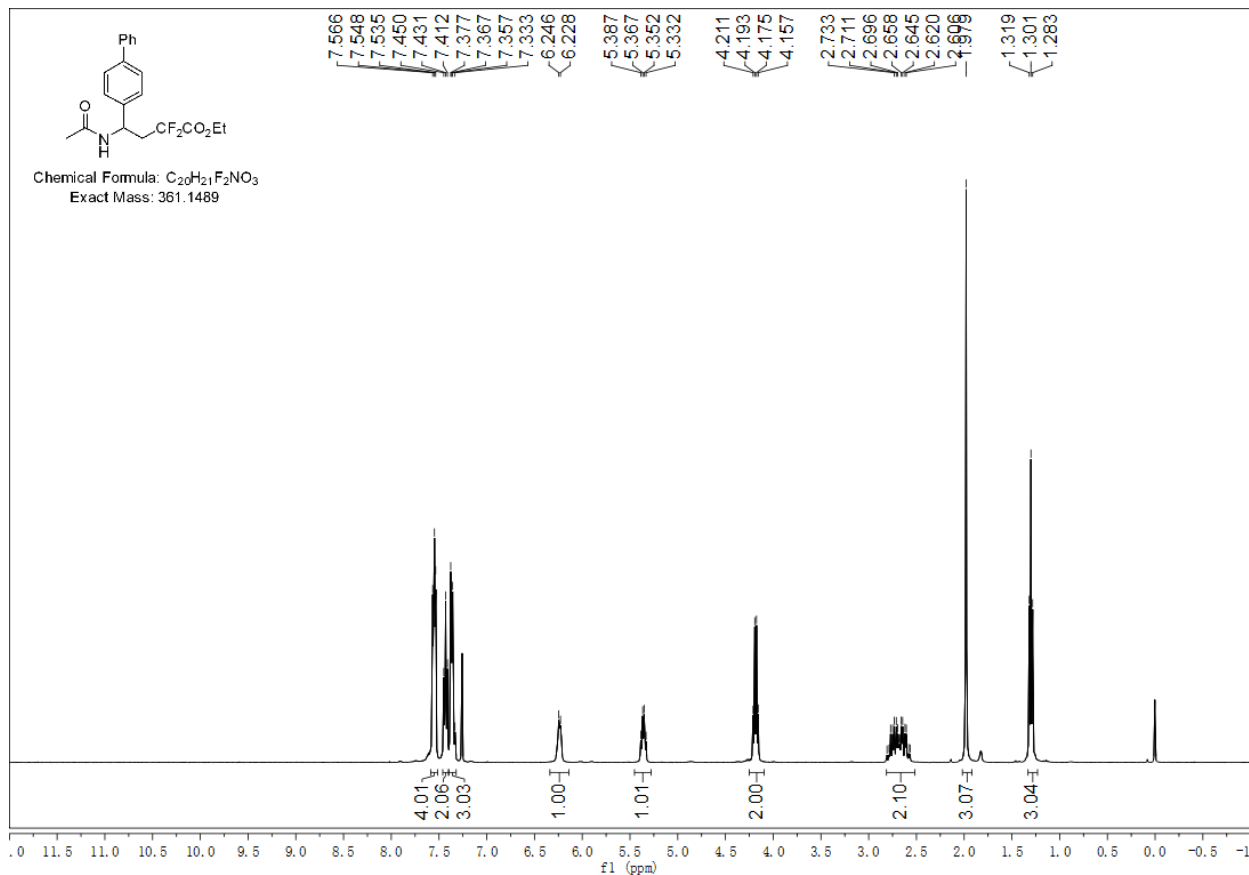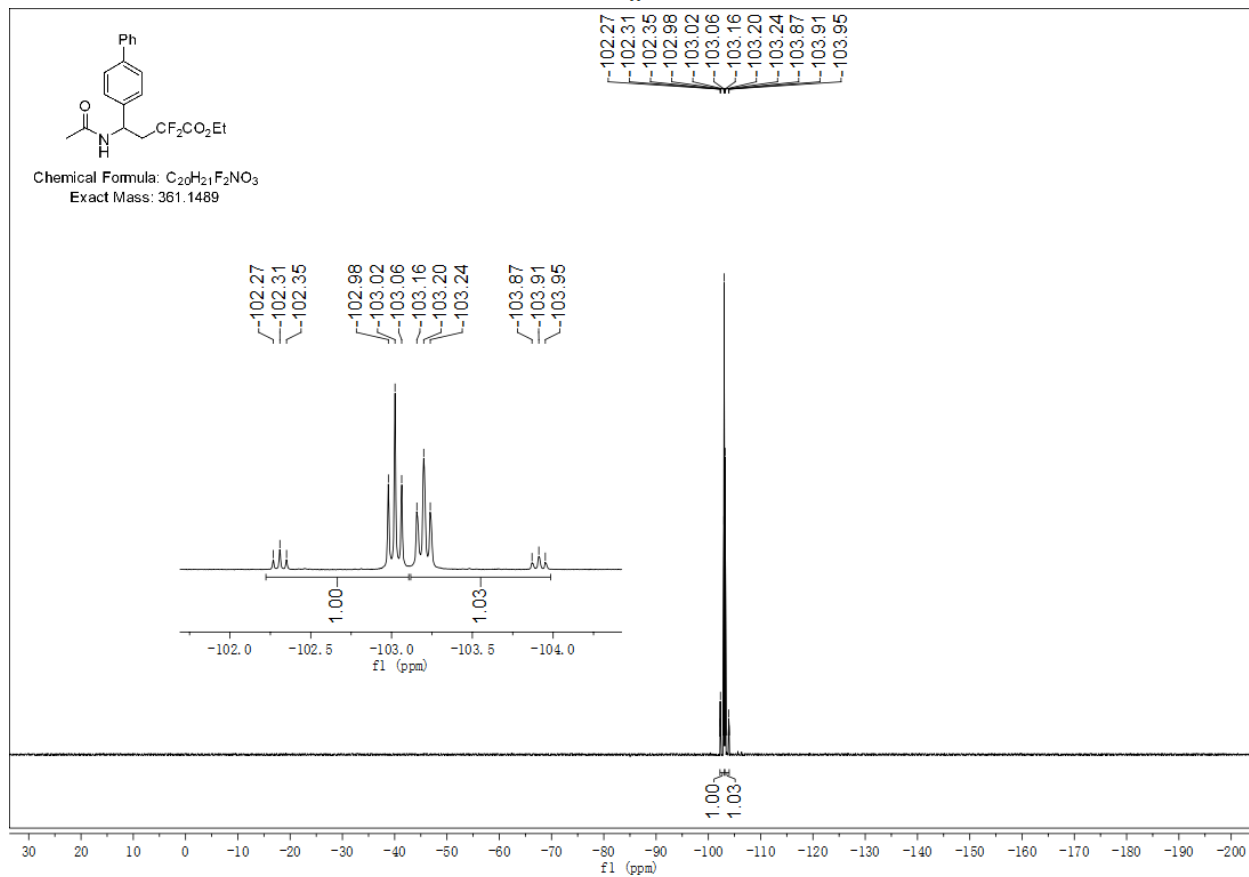

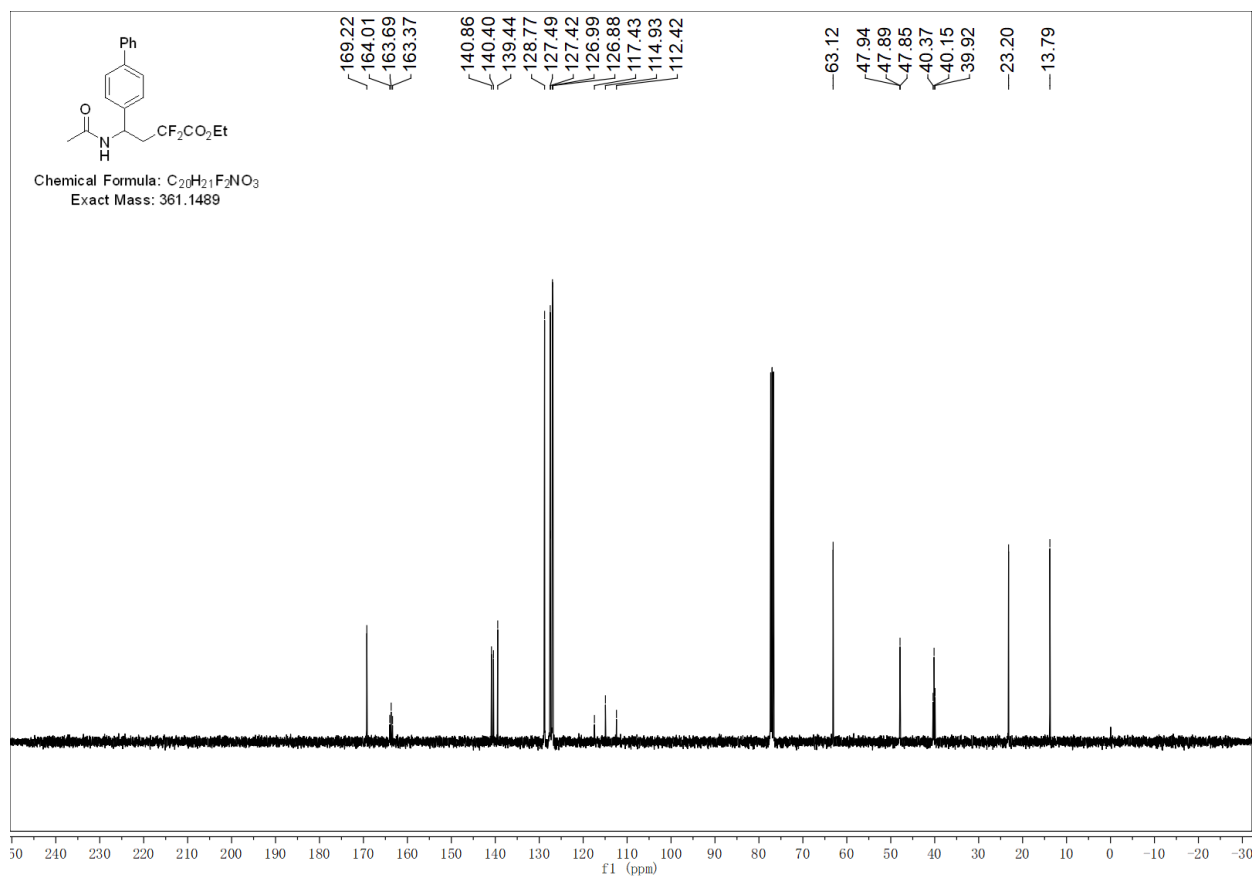

### Ethyl 4-acetamido-2,2-difluoro-4-(p-tolyl)butanoate (5)

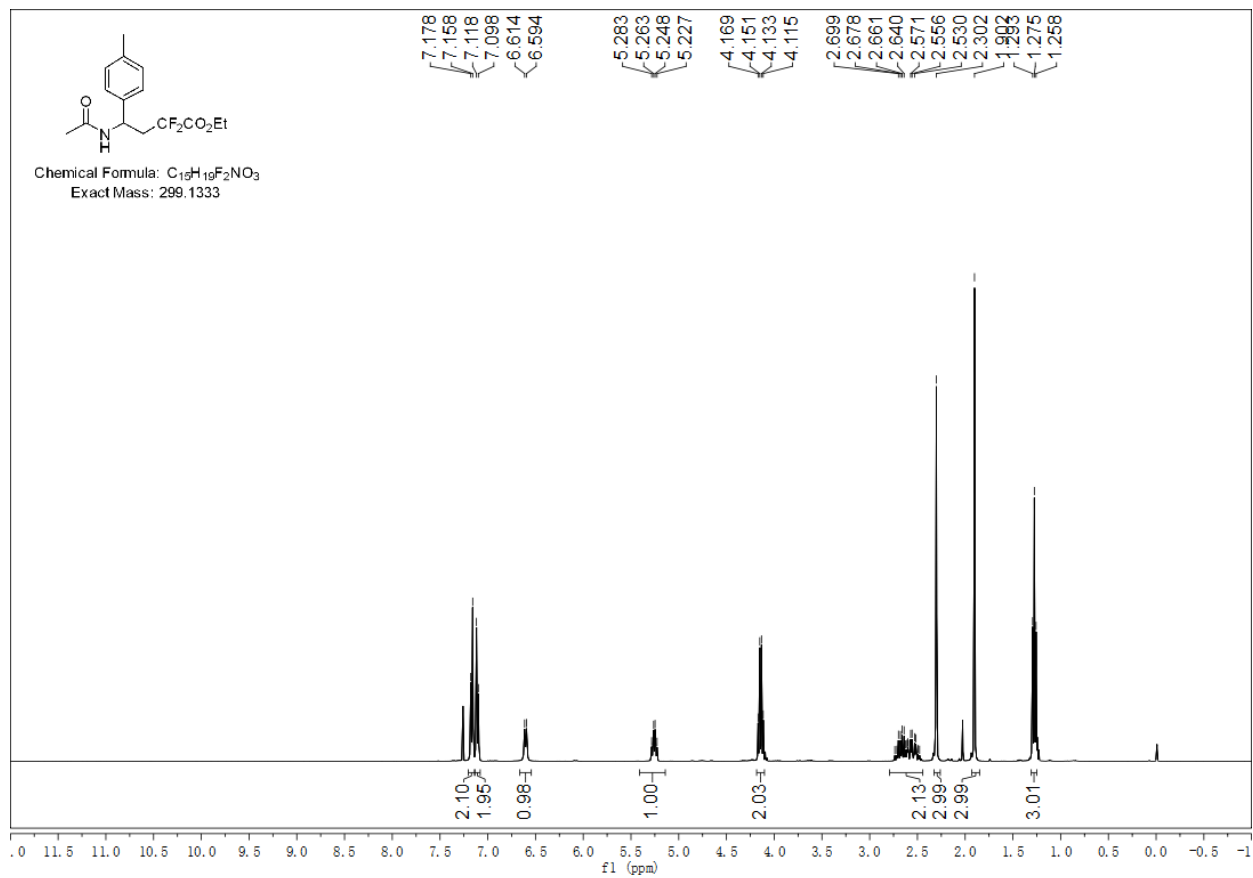

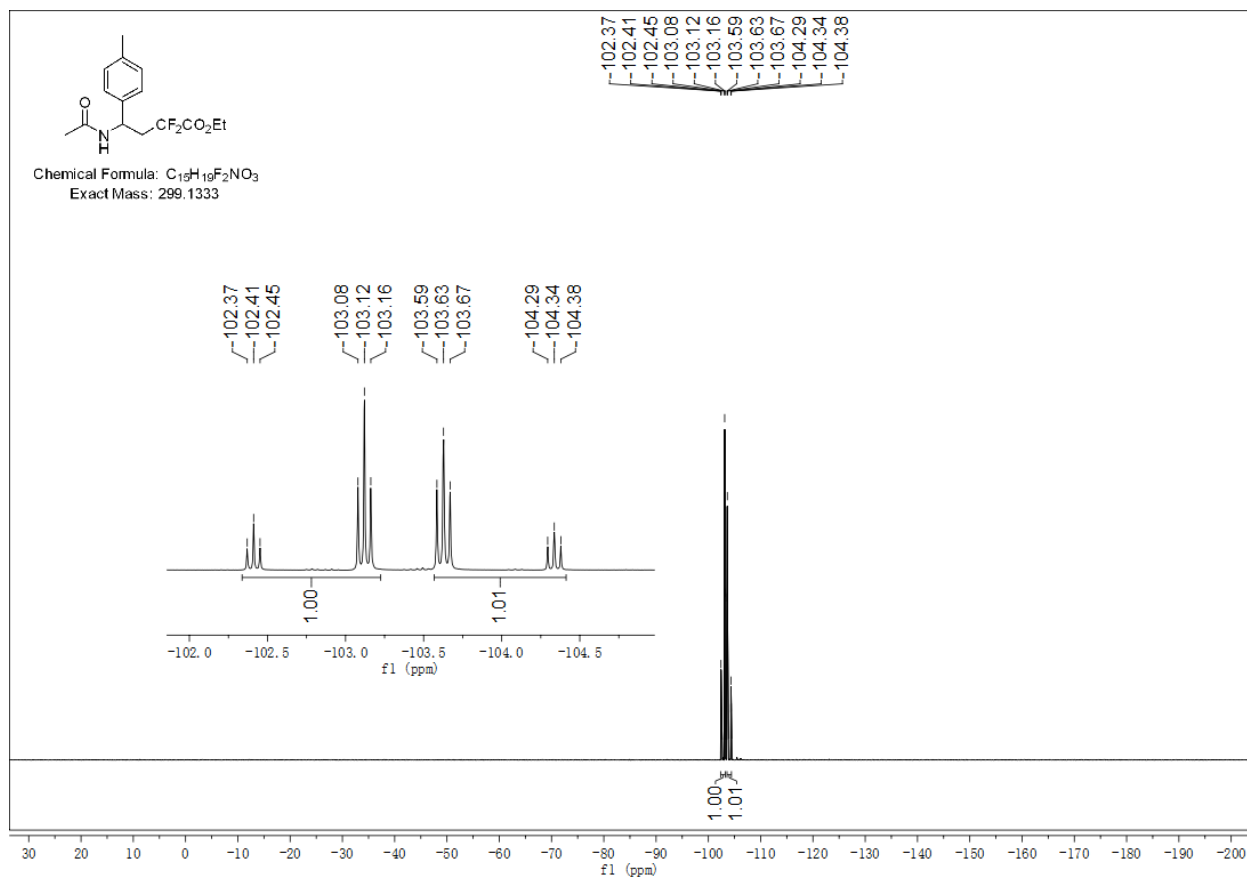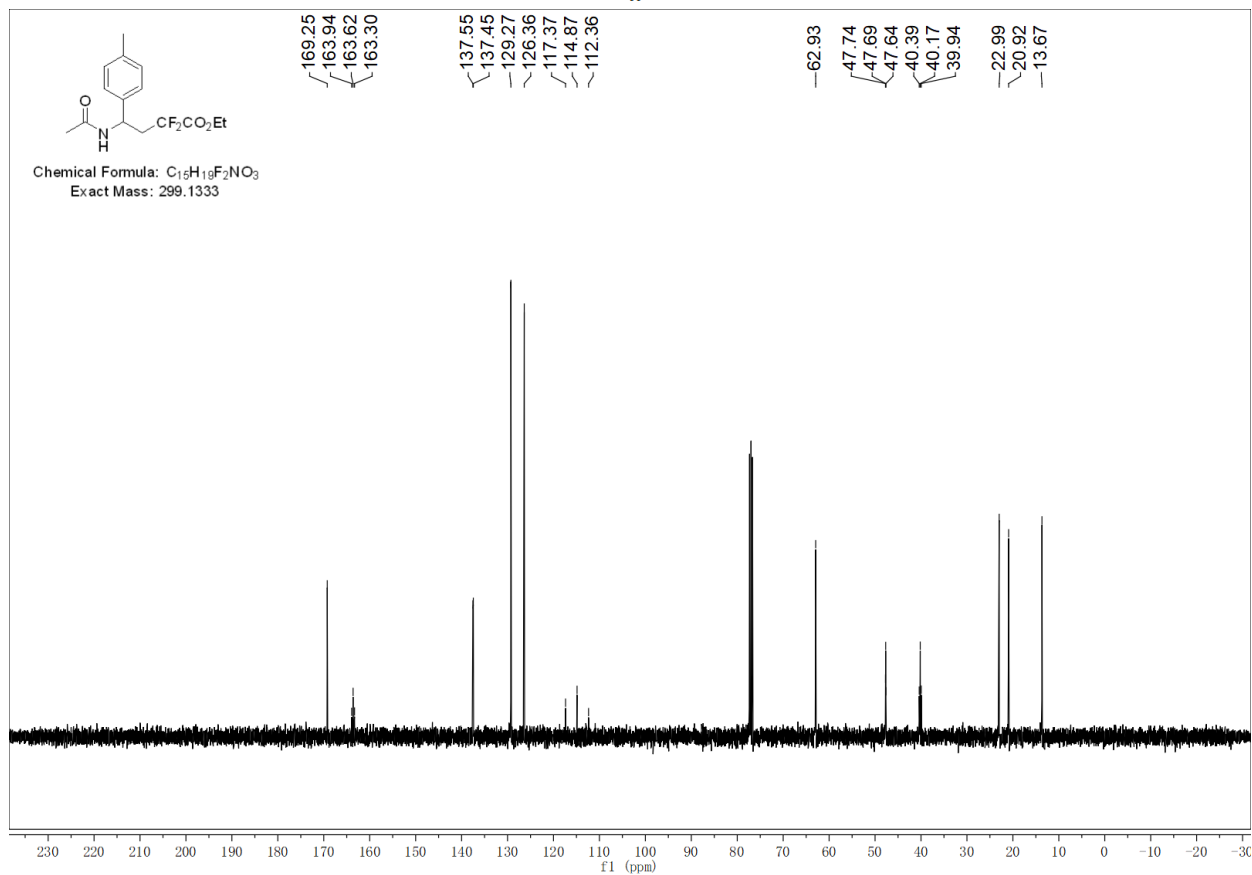

**Ethyl 4-acetamido-4-(4-(tert-butyl)phenyl)-2,2-difluorobutanoate (6)**

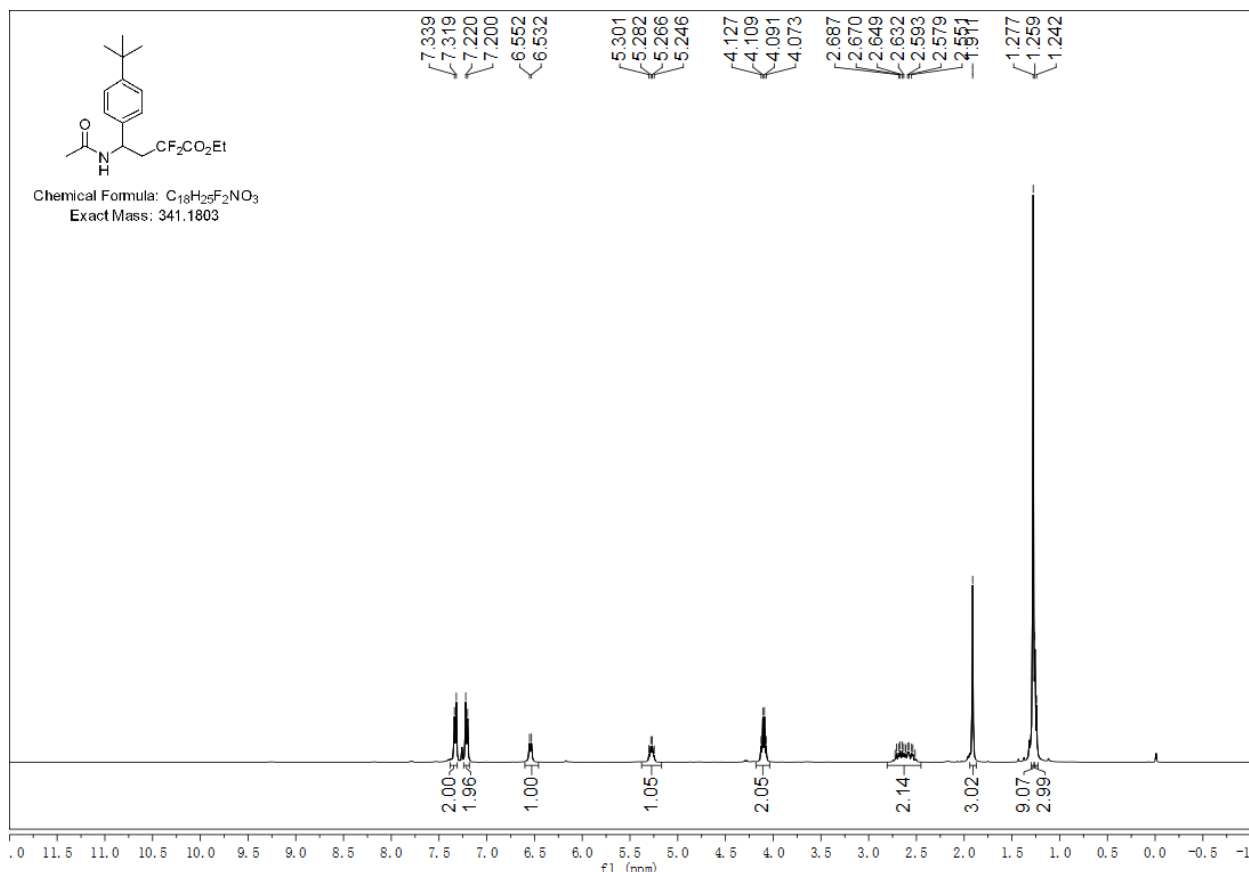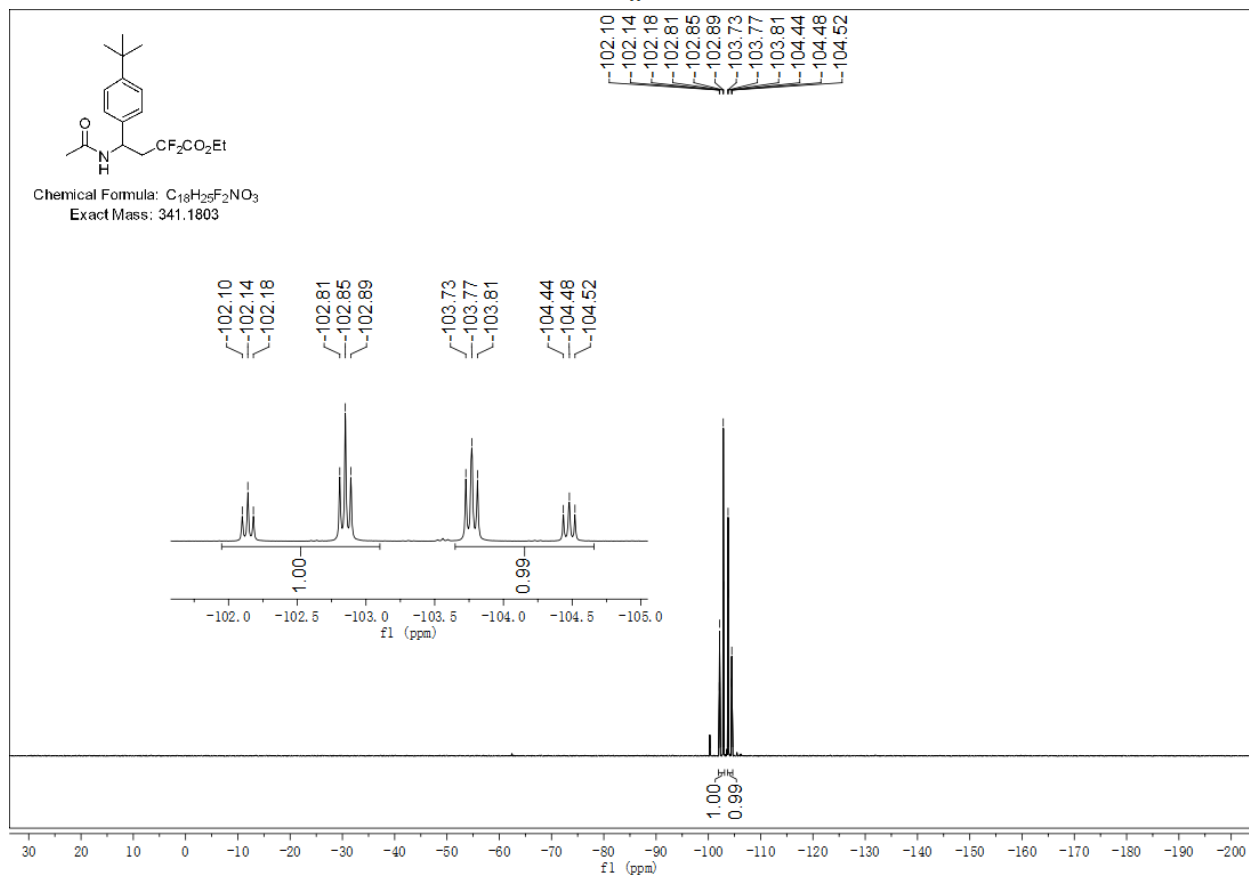

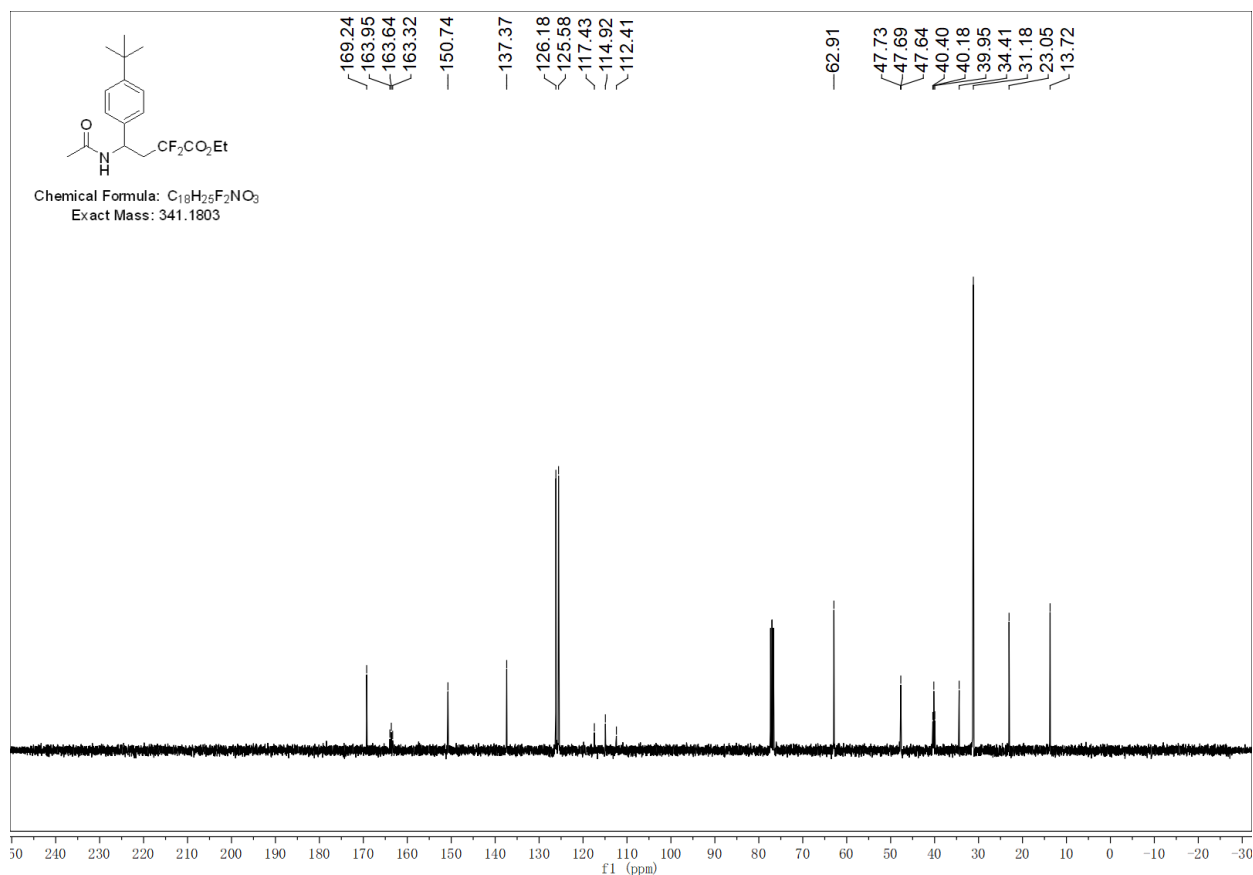

### Ethyl 4-acetamido-2,2-difluoro-4-phenylbutanoate (7)

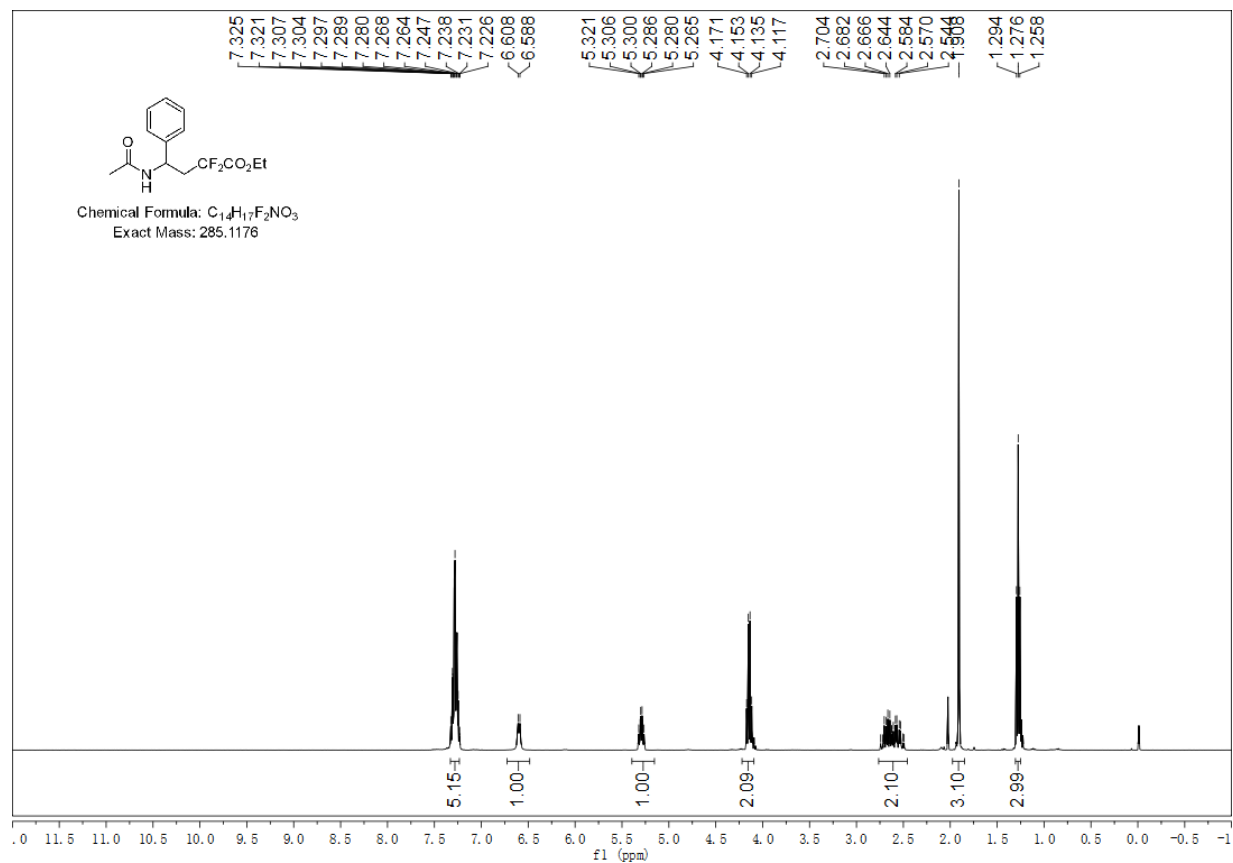





# Ethyl 4-acetamido-2,2-difluoro-4-(4-phenoxyphenyl)butanoate (8)

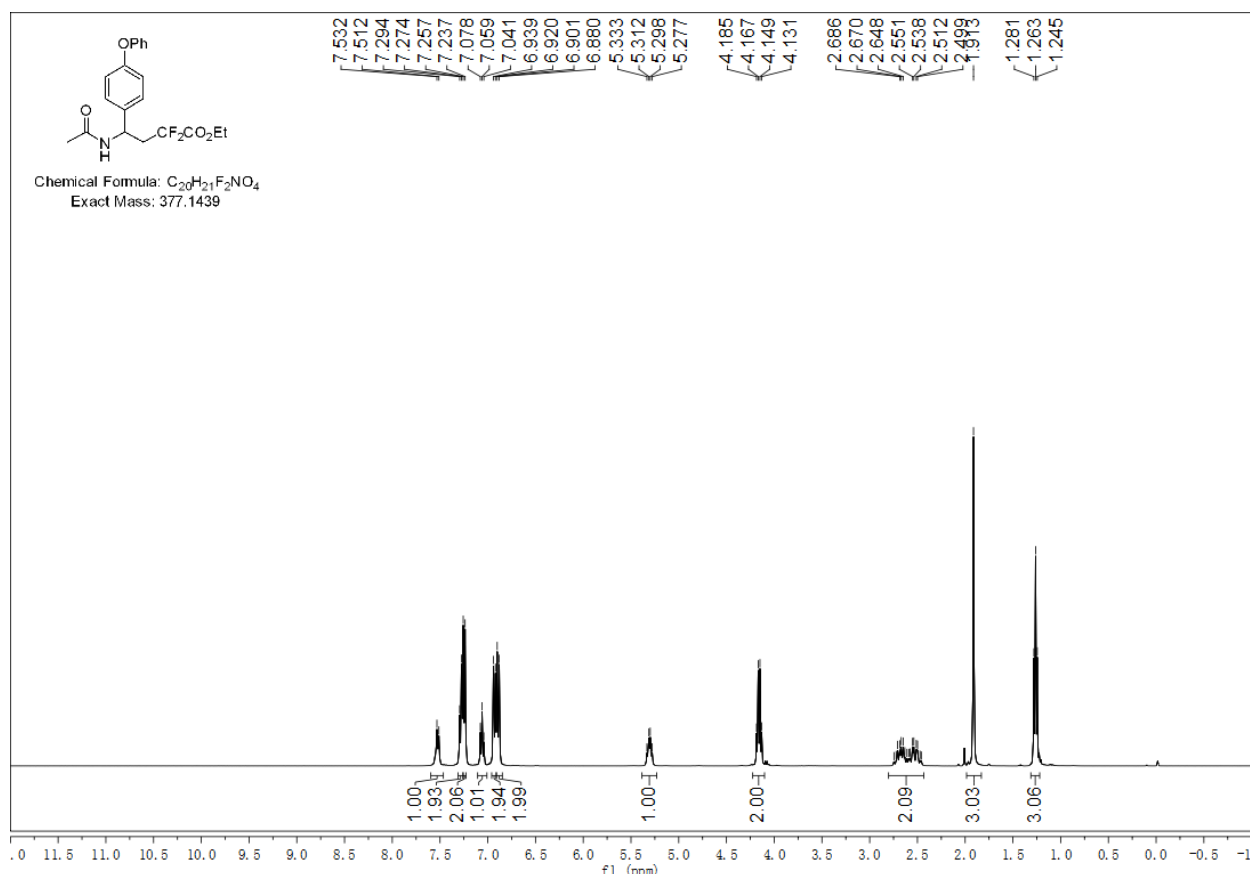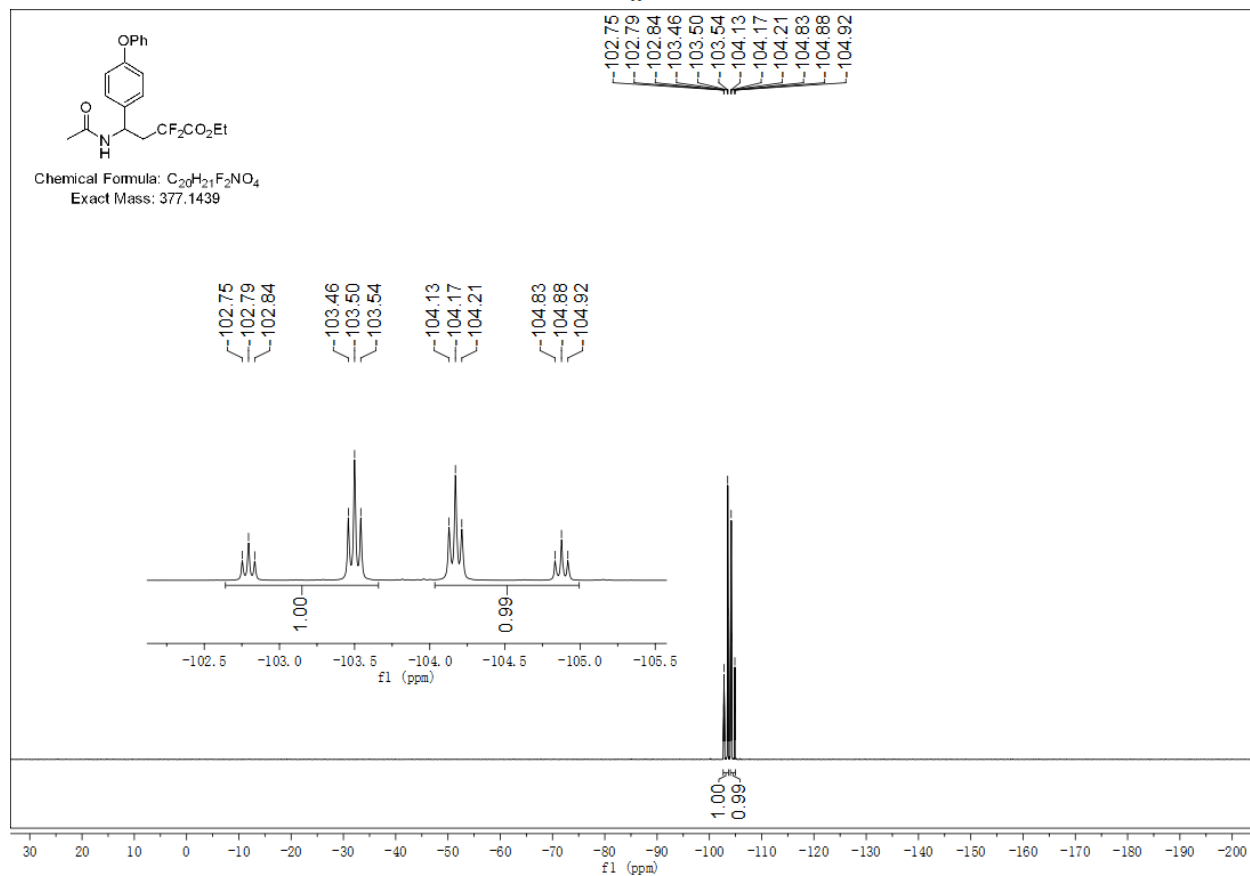

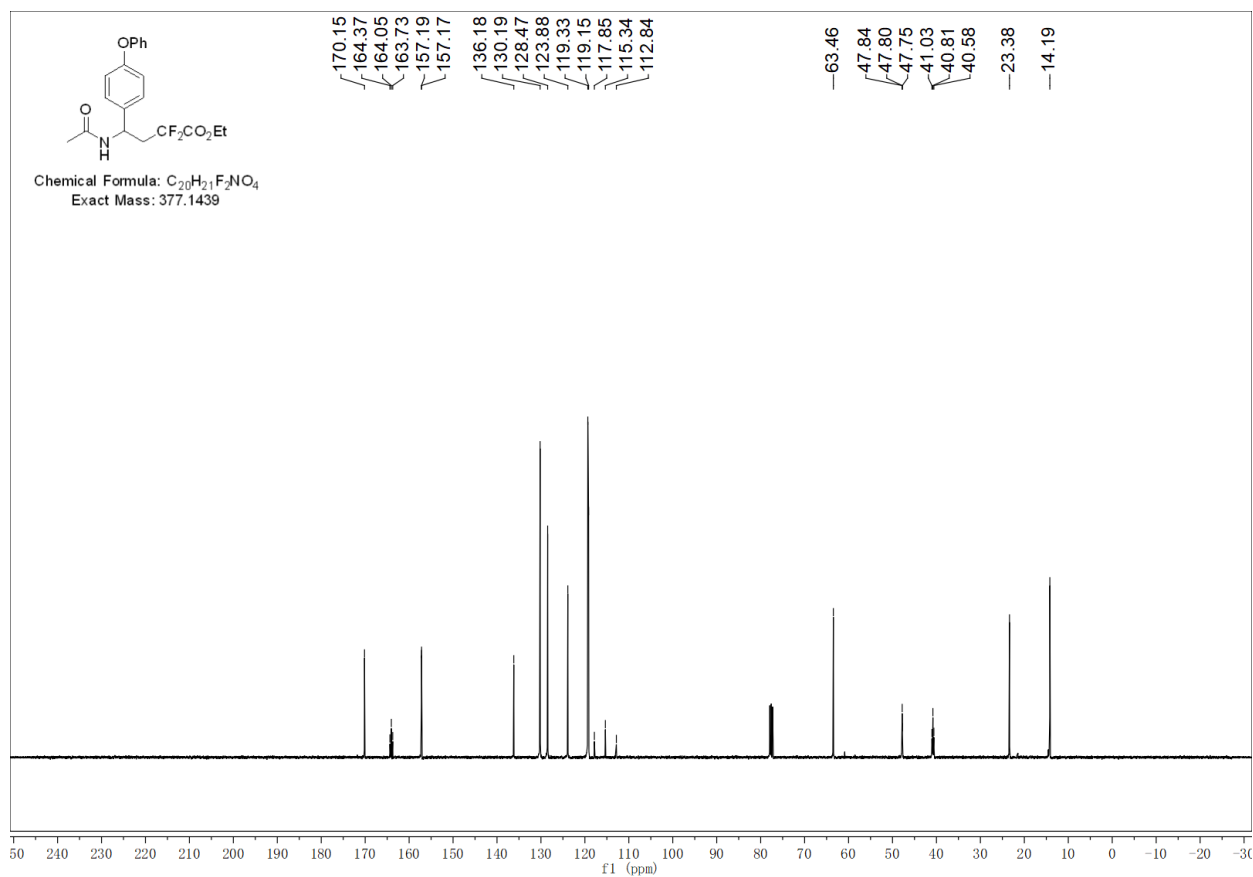

### Ethyl 4-acetamido-2,2-difluoro-4-(4-methoxyphenyl)butanoate (9)

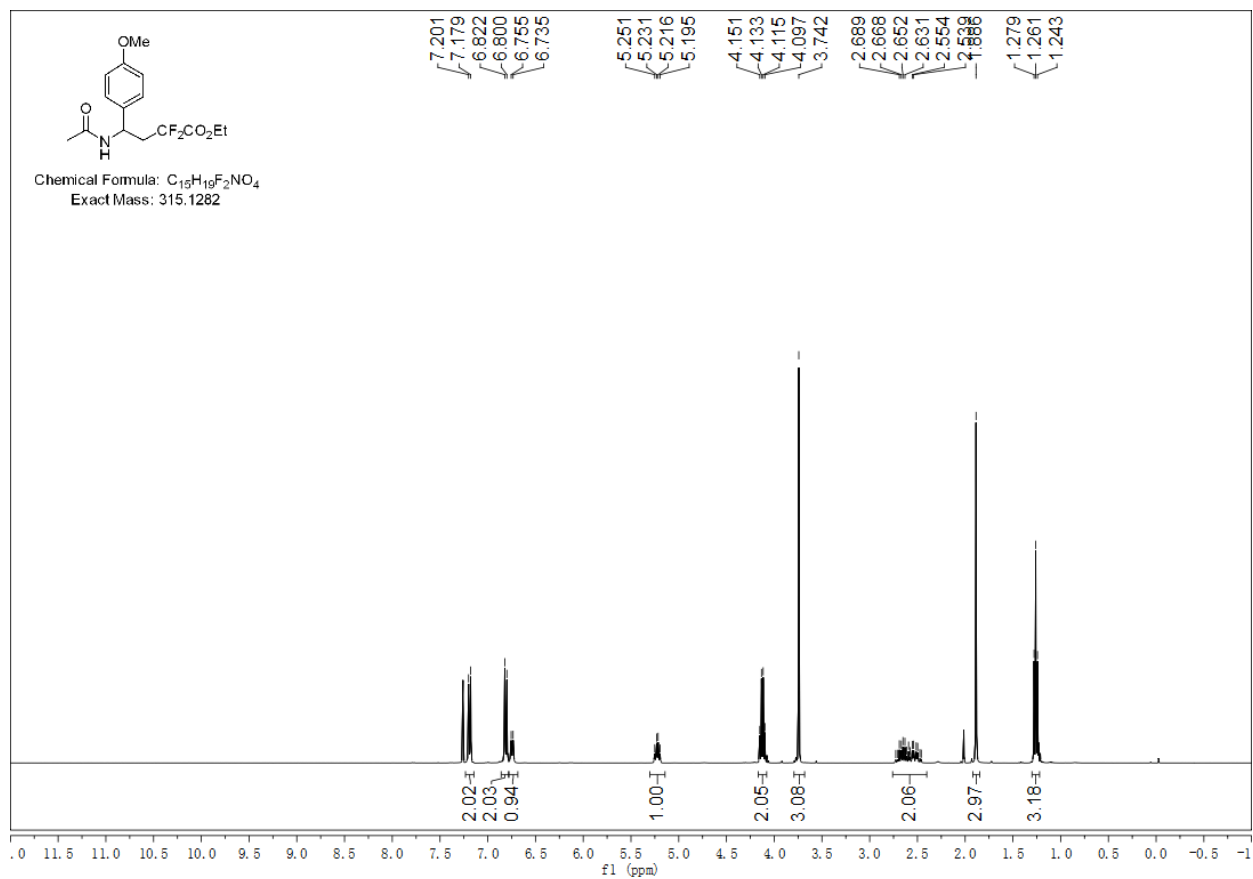

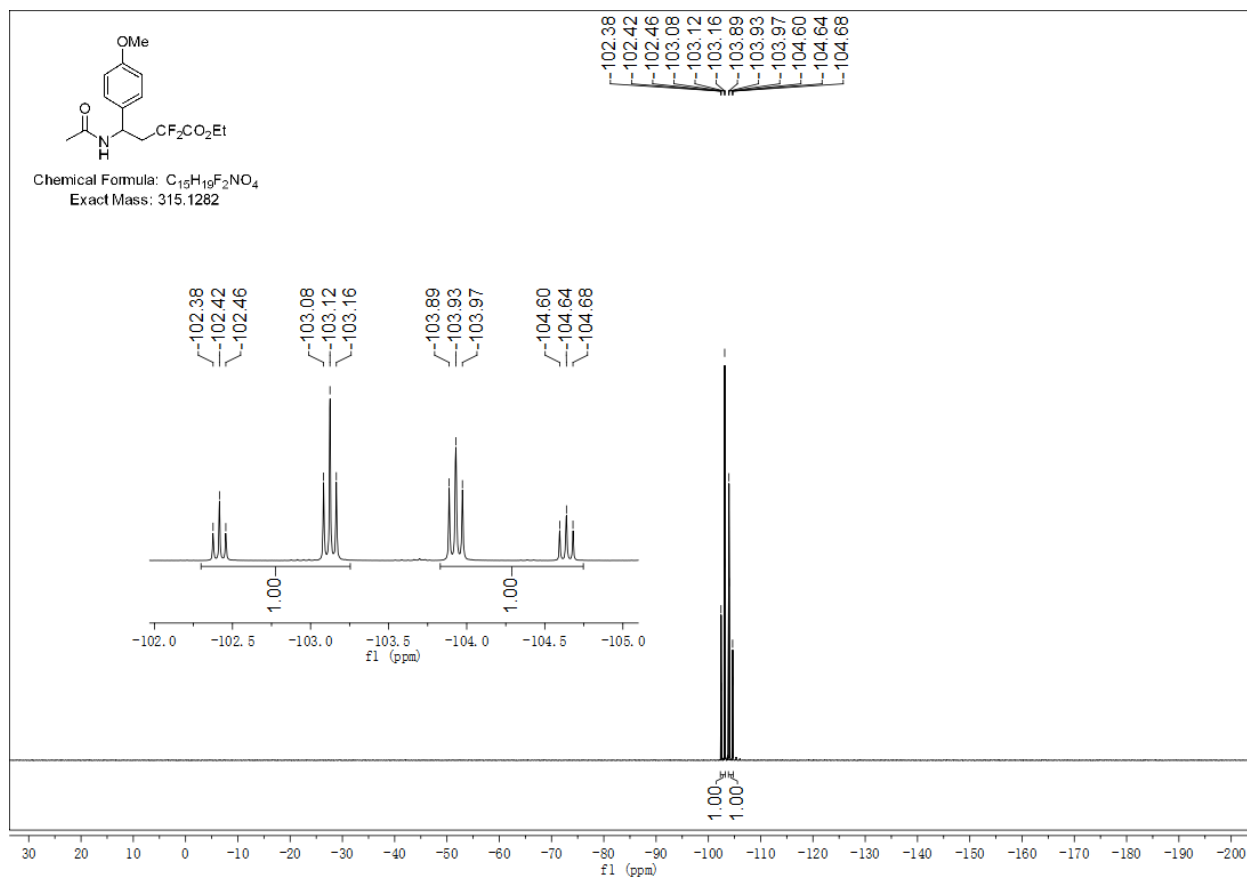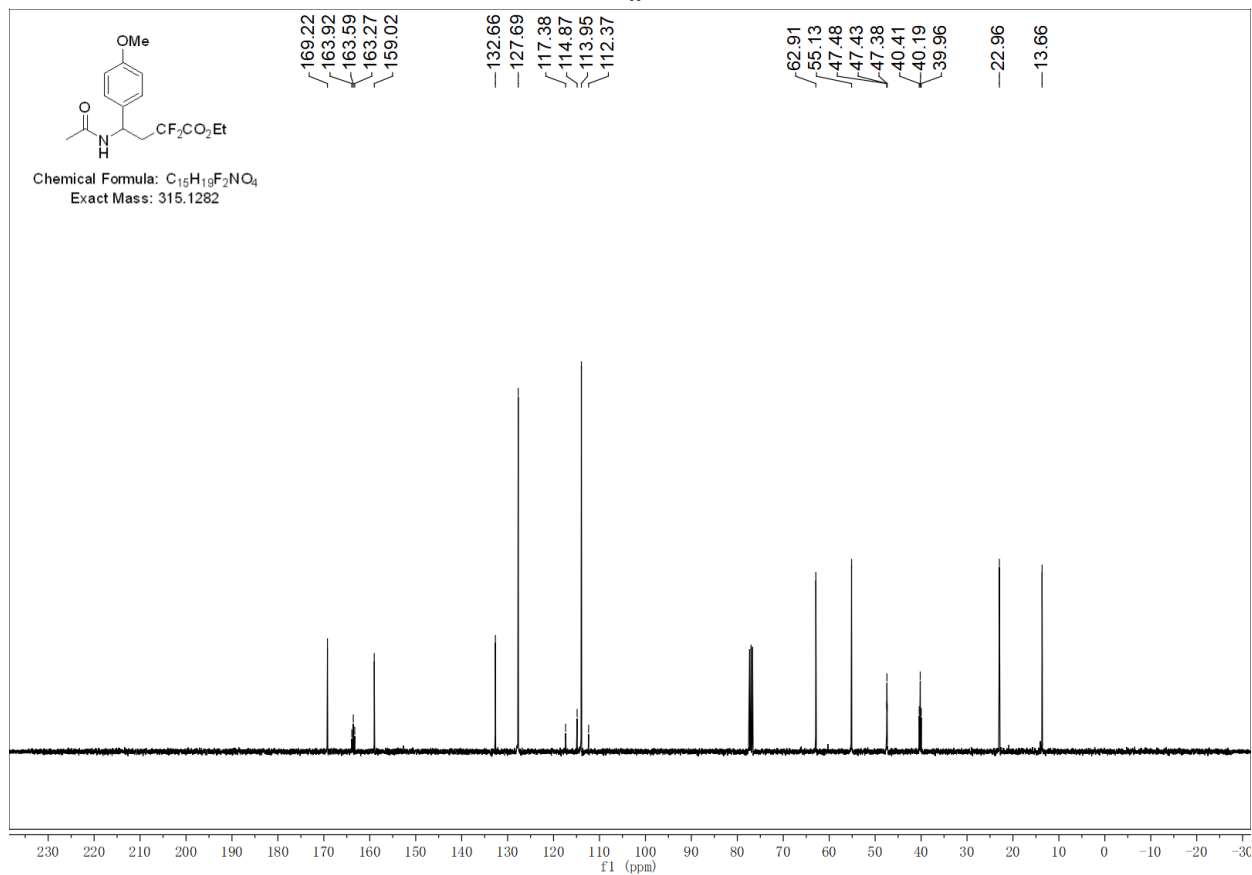

# Ethyl 4-acetamido-2,2-difluoro-4-(4-(trifluoromethyl)phenyl)butanoate (10)

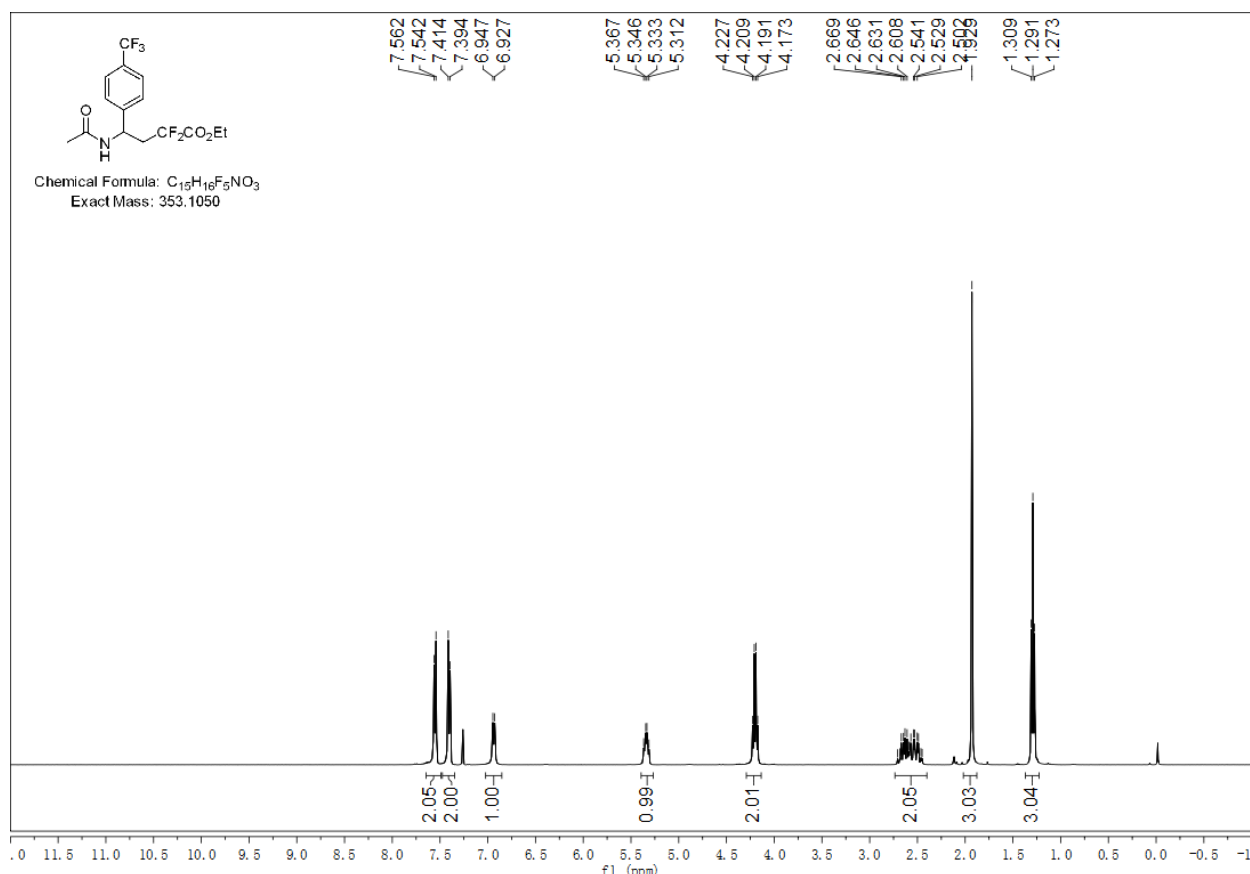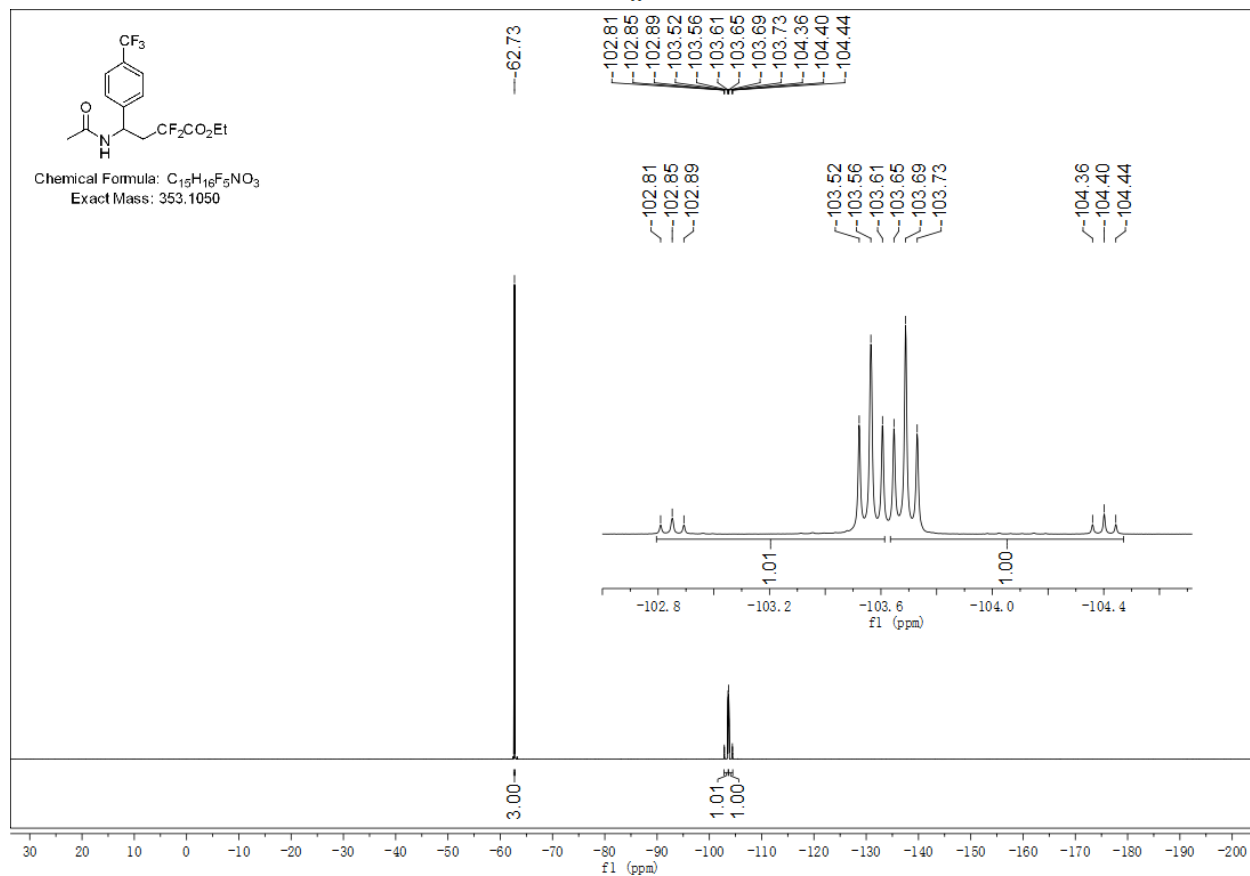

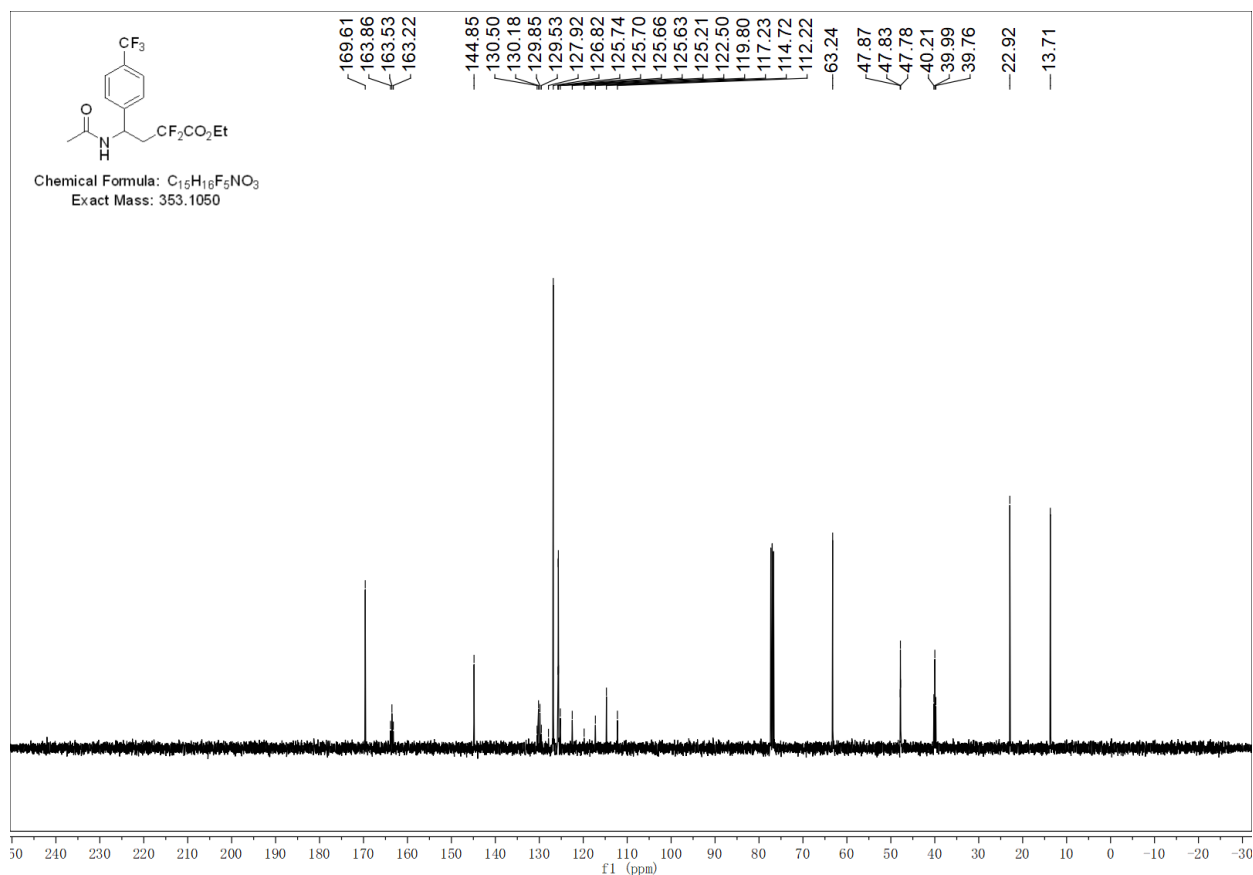

**Ethyl 4-(1-acetamido-4-ethoxy-3,3-difluoro-4-oxobutyl)benzoate (11)**

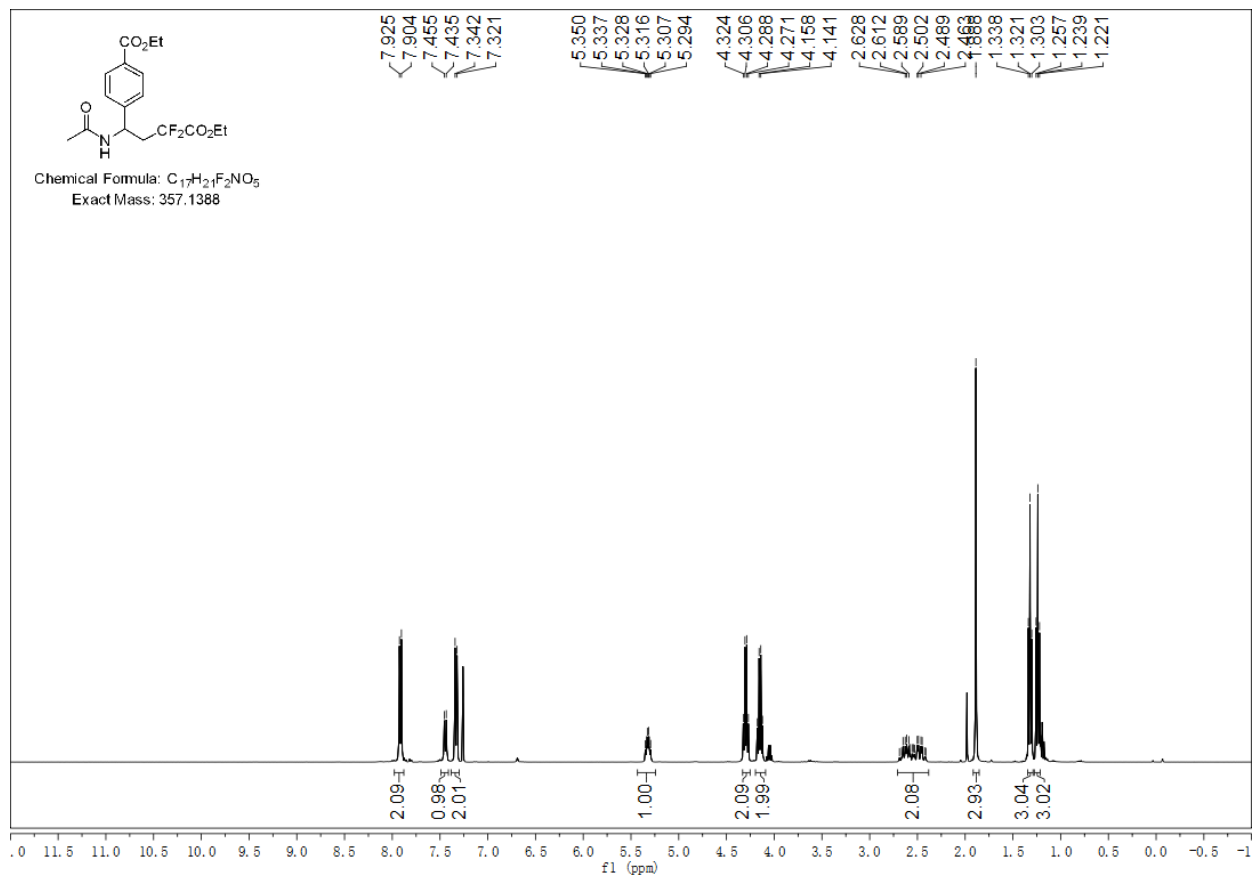

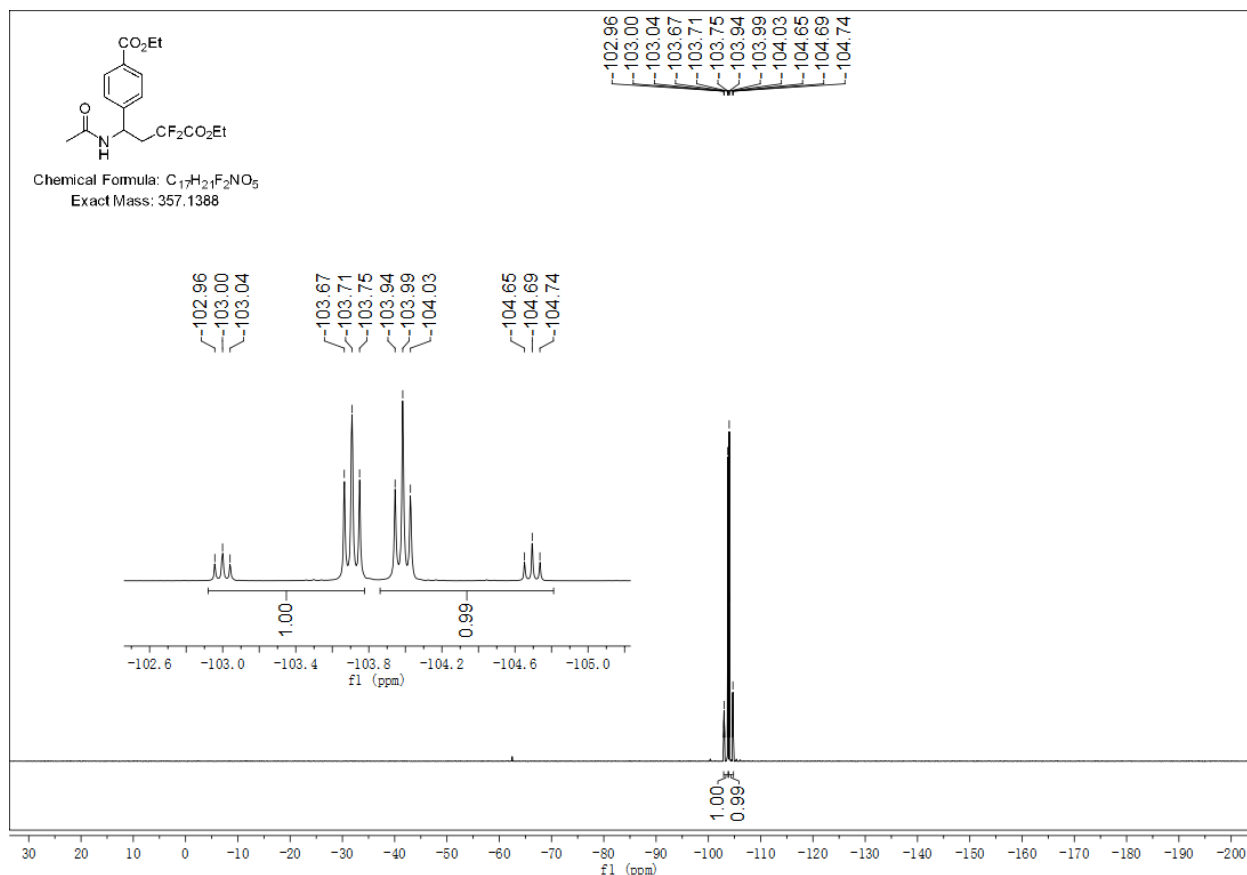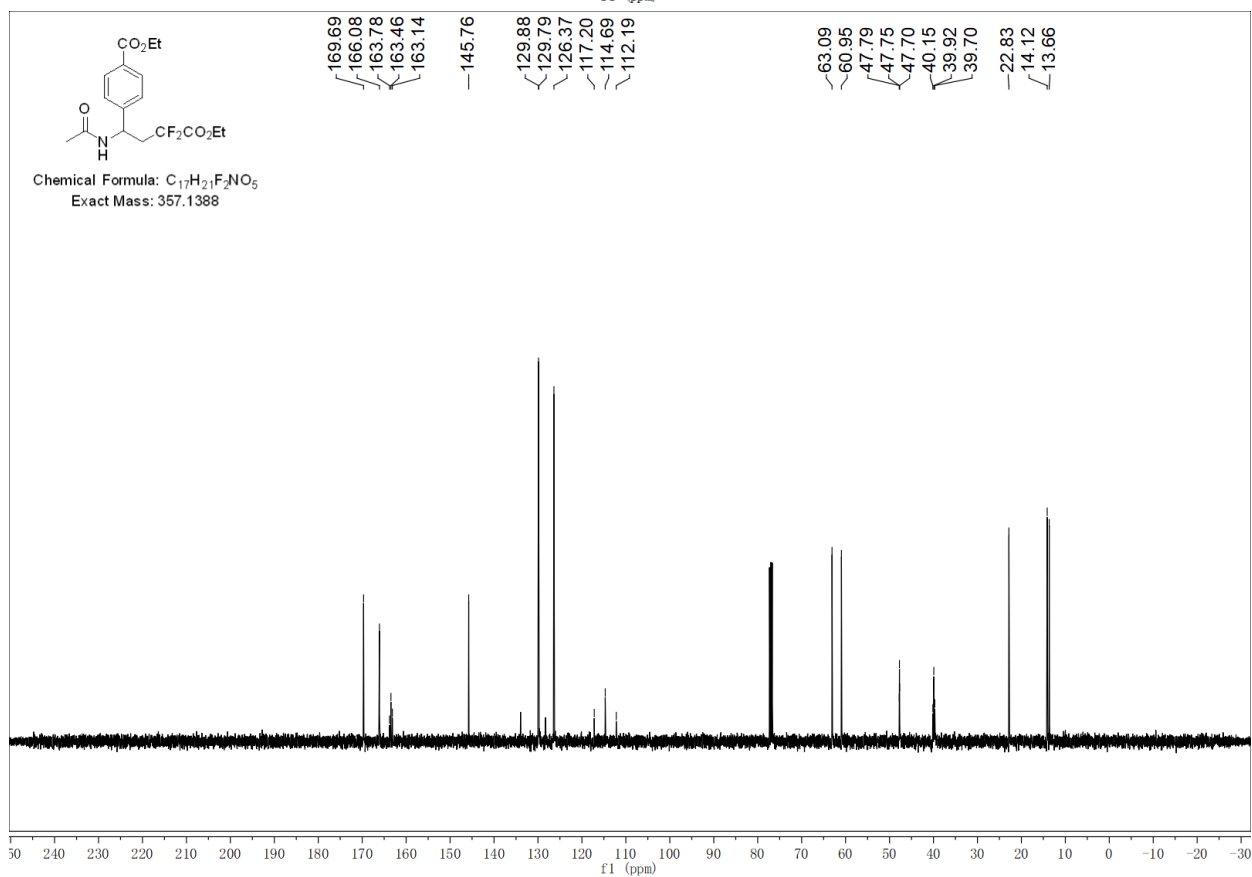

# Ethyl 3-(1-acetamido-4-ethoxy-3,3-difluoro-4-oxobutyl)benzoate (12)

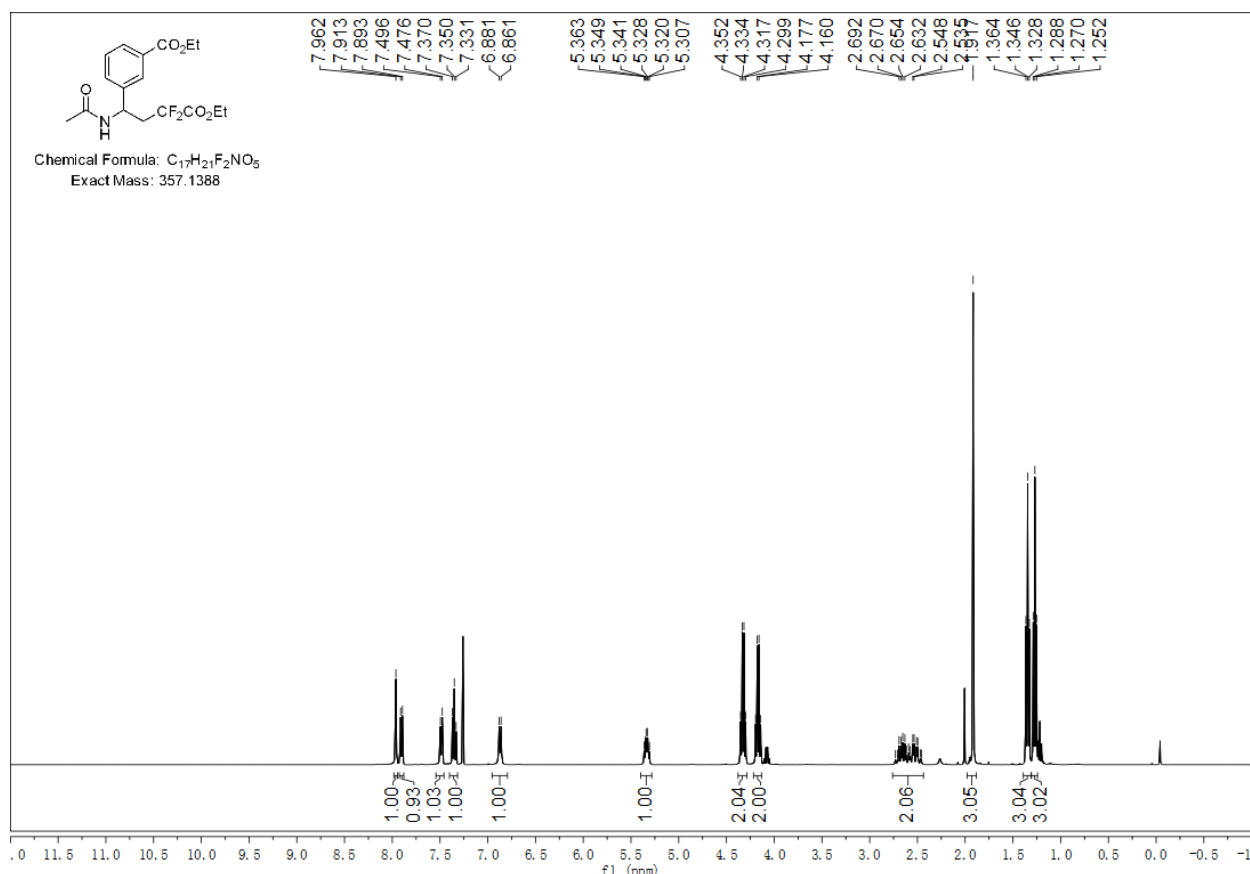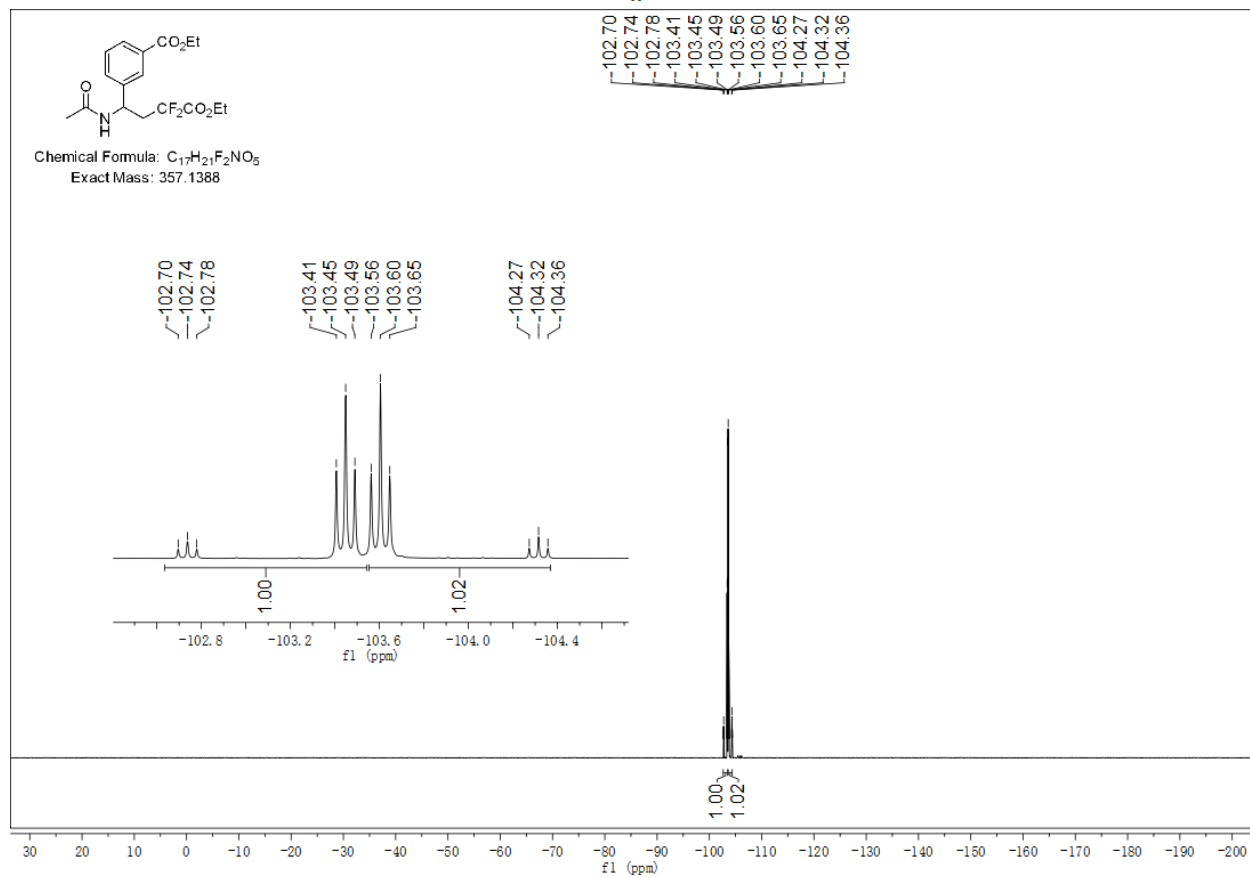



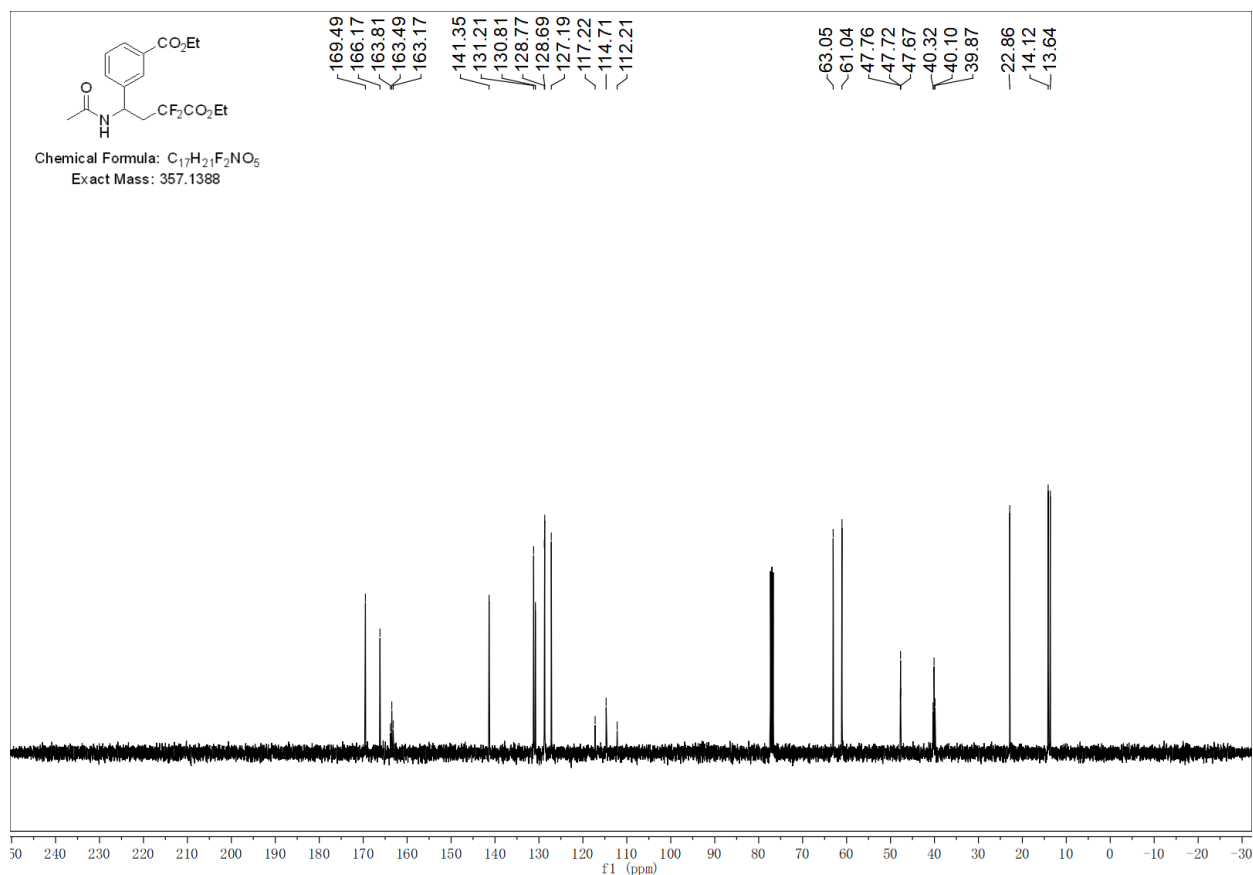

### Ethyl 4-acetamido-4-(4-acetylphenyl)-2,2-difluorobutanoate (13)

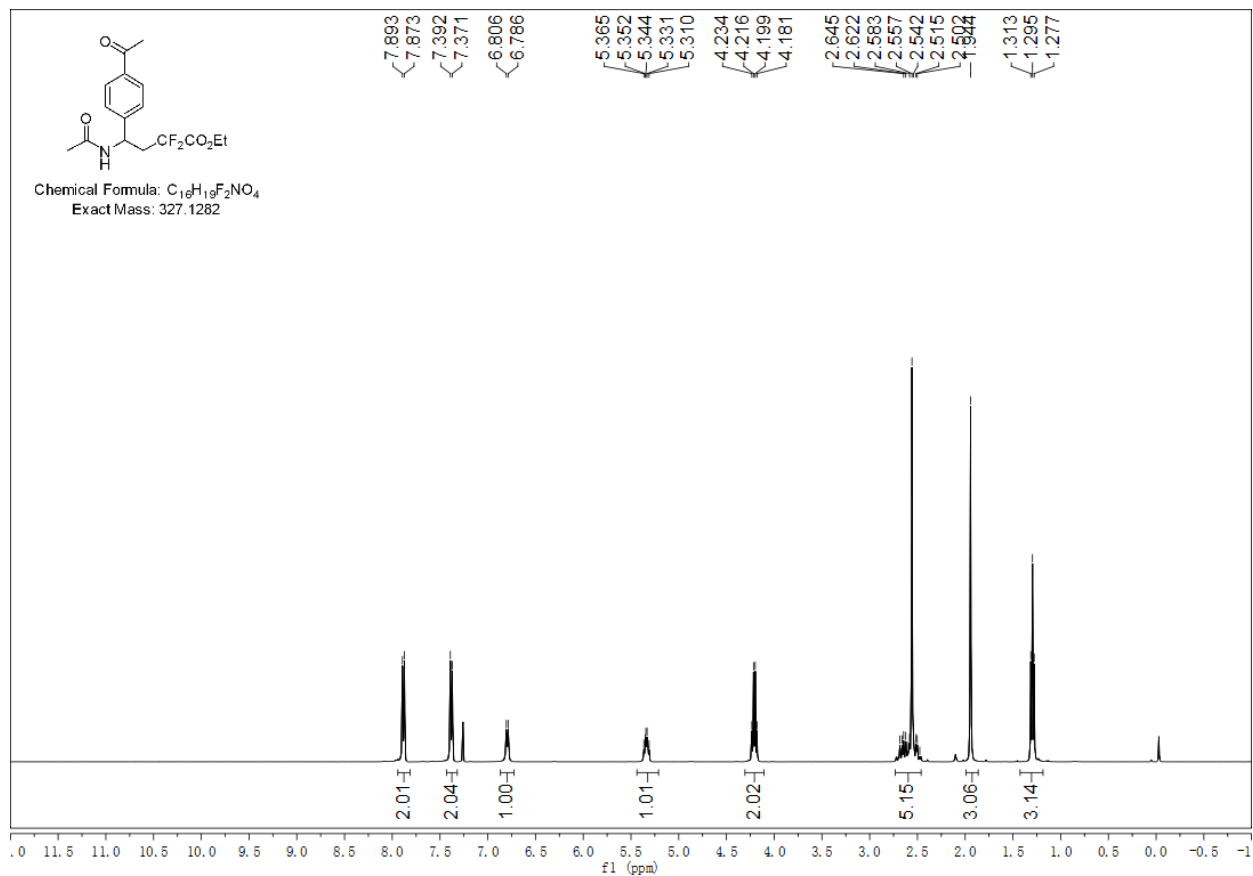

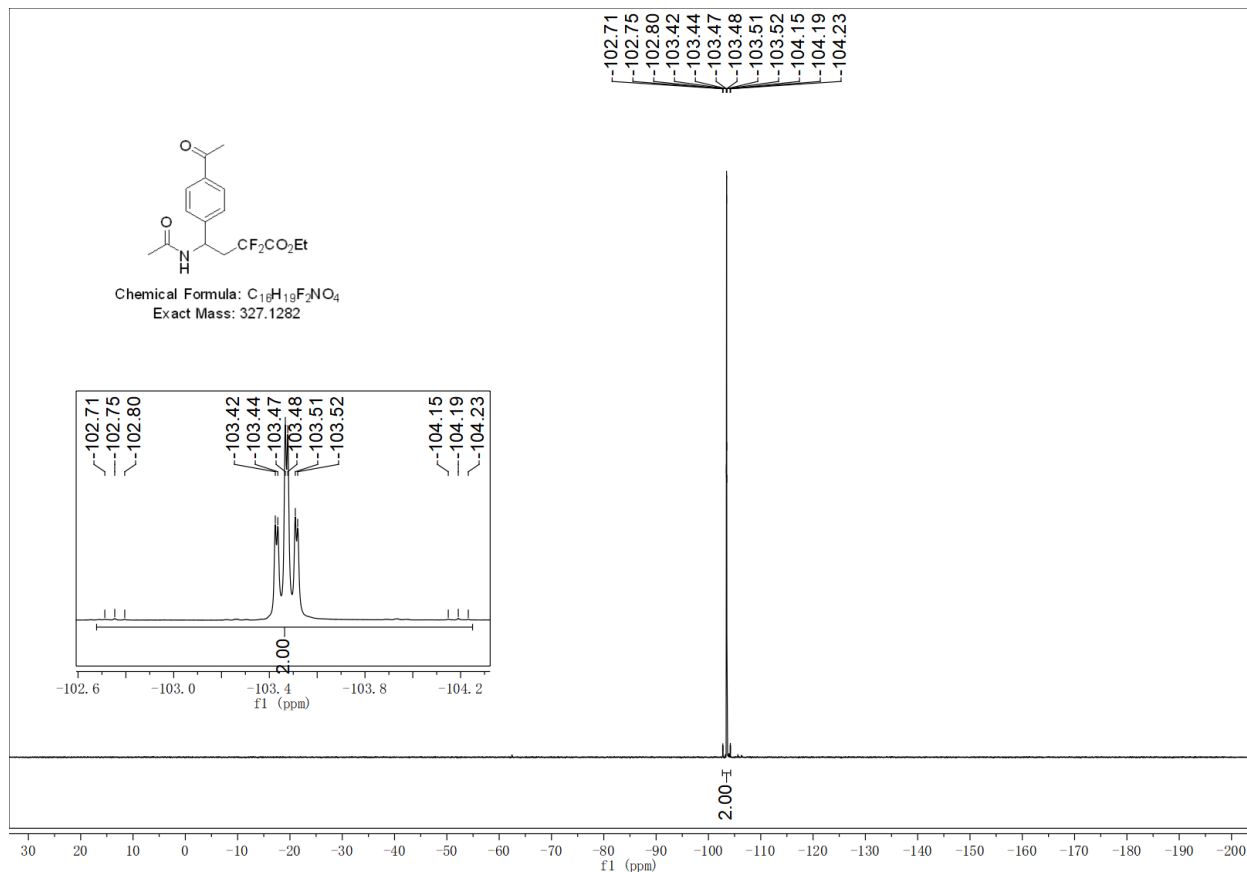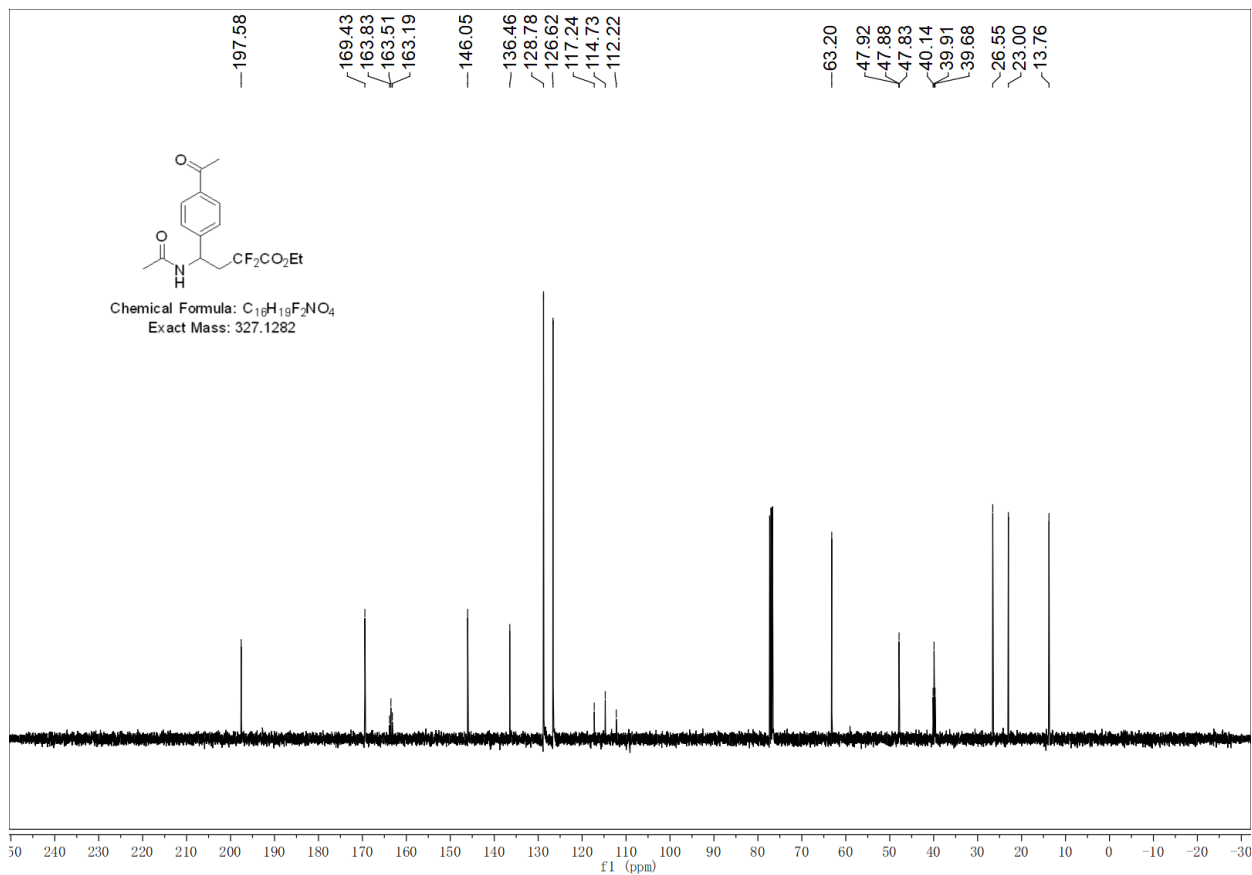

# Ethyl 4-acetamido-2,2-difluoro-4-(4-formylphenyl)butanoate (14)

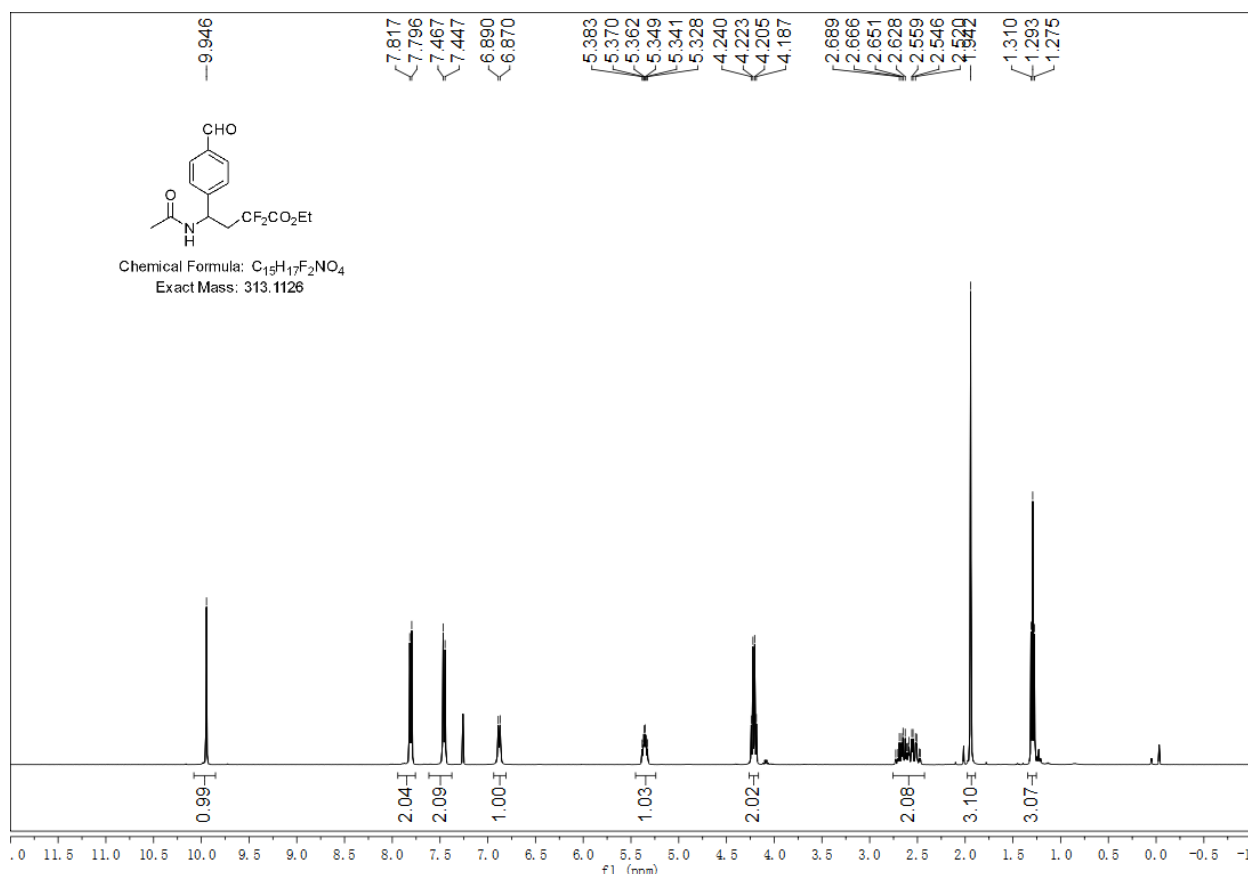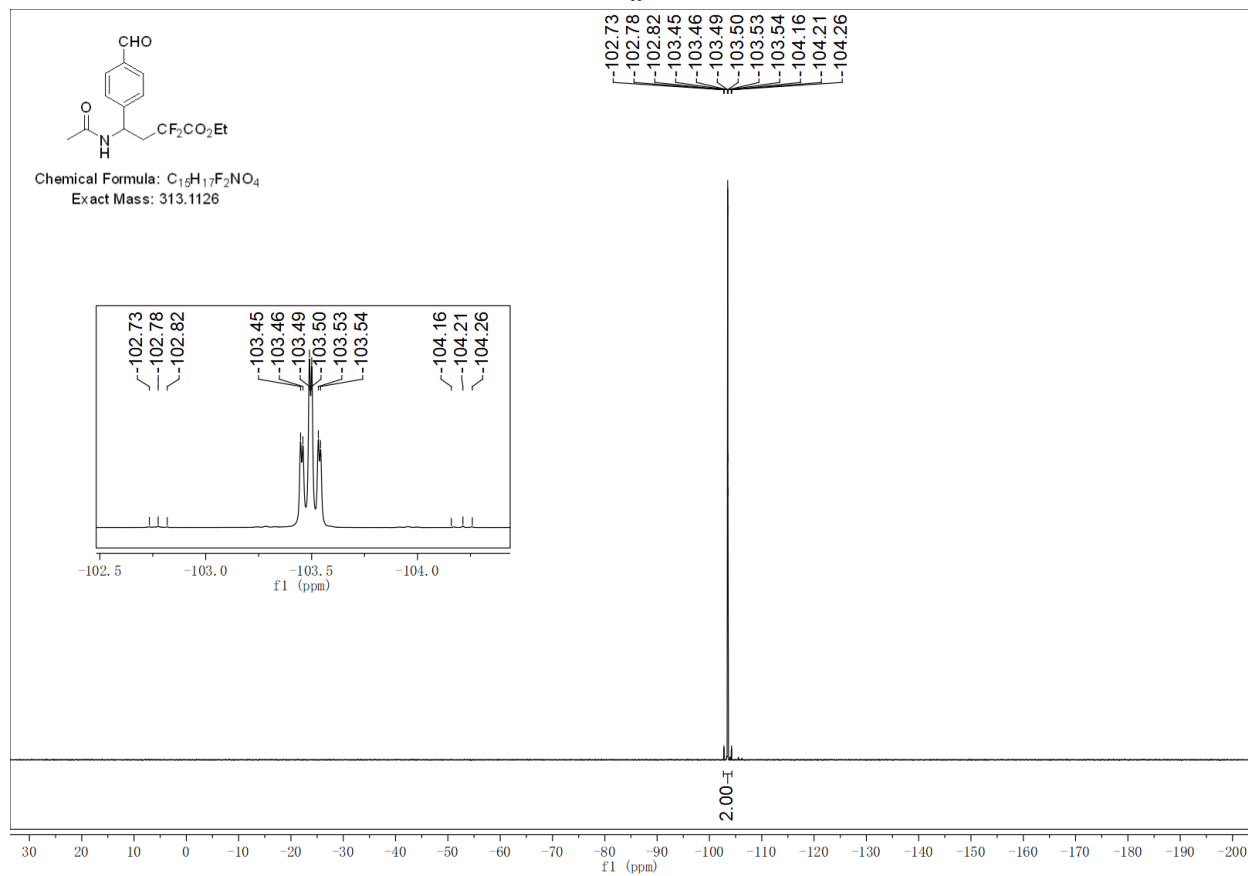

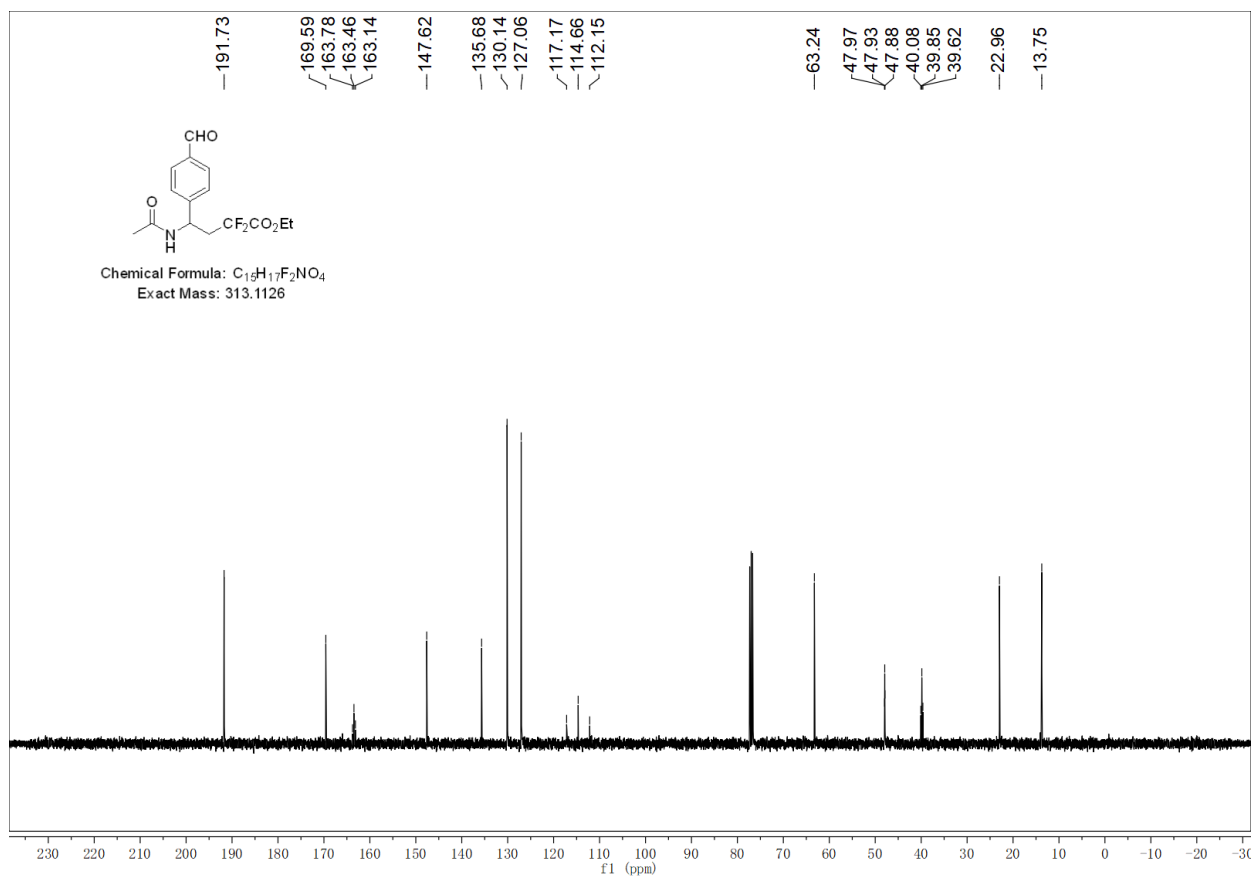

### Ethyl 4-acetamido-4-(4-cyanophenyl)-2,2-difluorobutanoate (15)

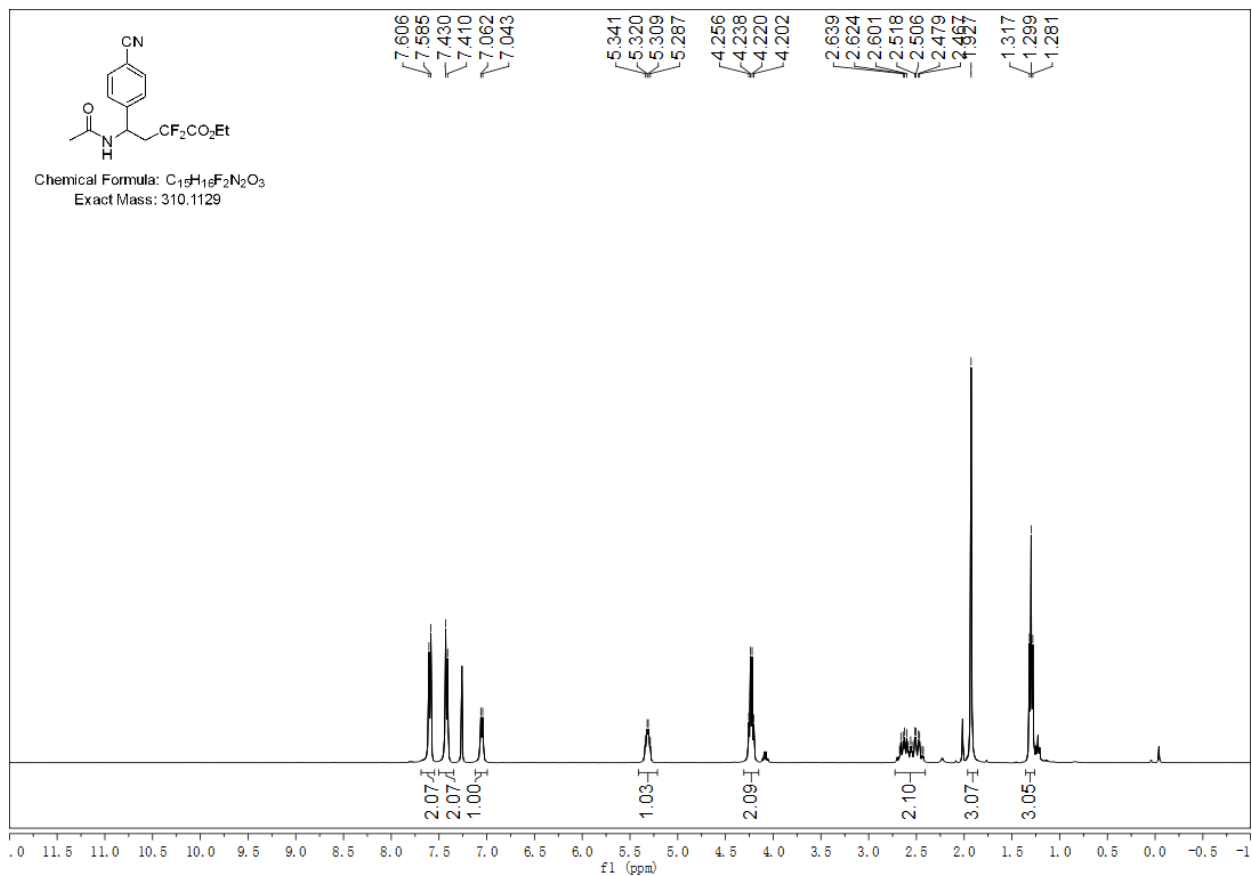

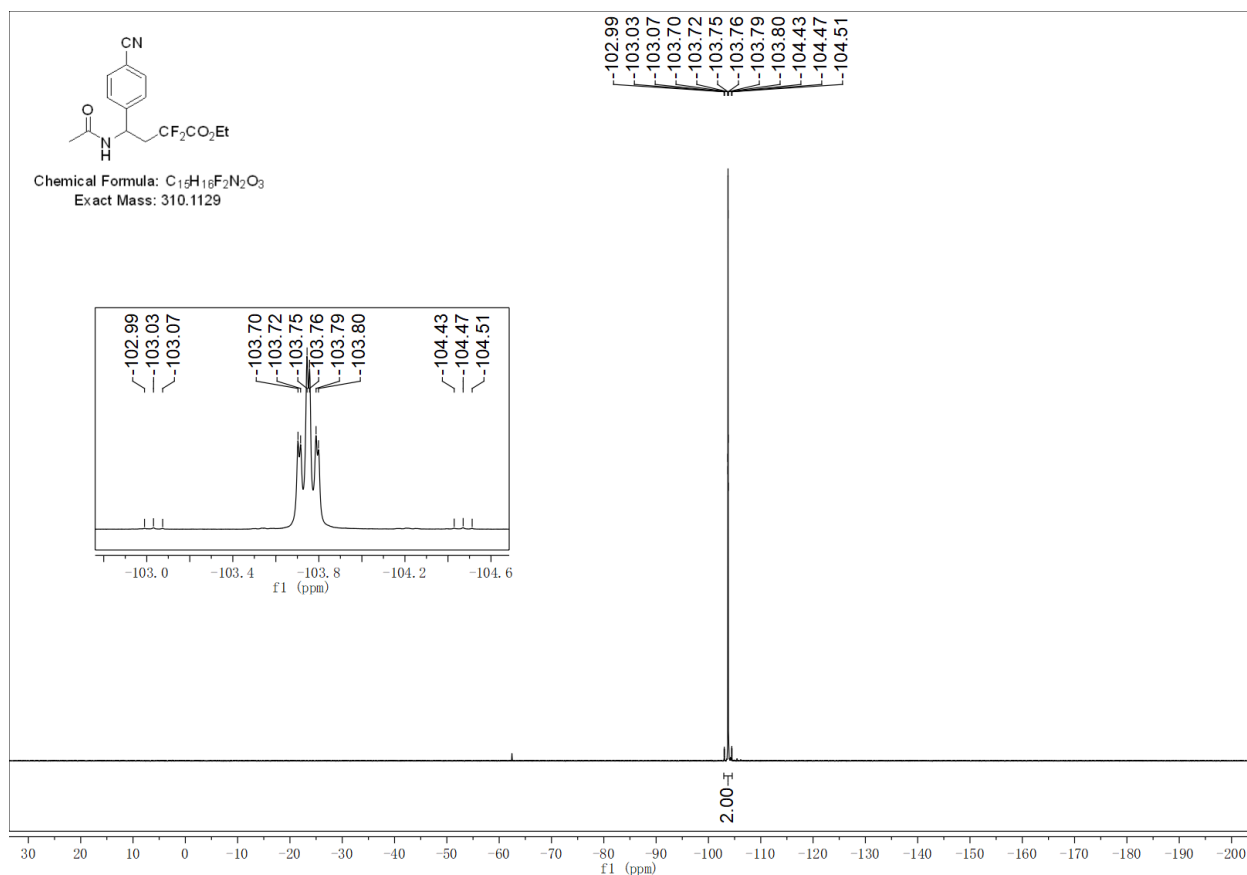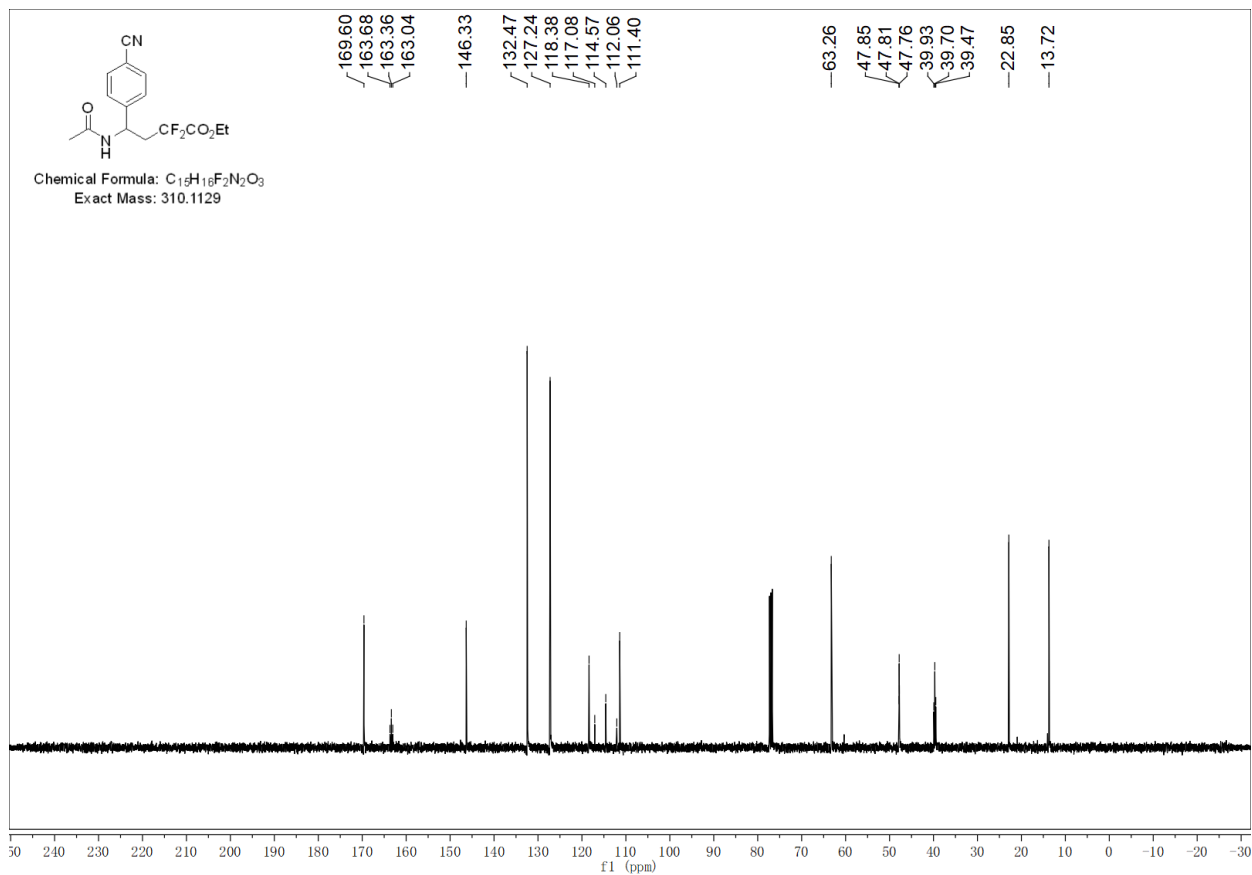

# Ethyl 4-acetamido-2,2-difluoro-4-(4-(trimethylsilyl)phenyl)butanoate (16)

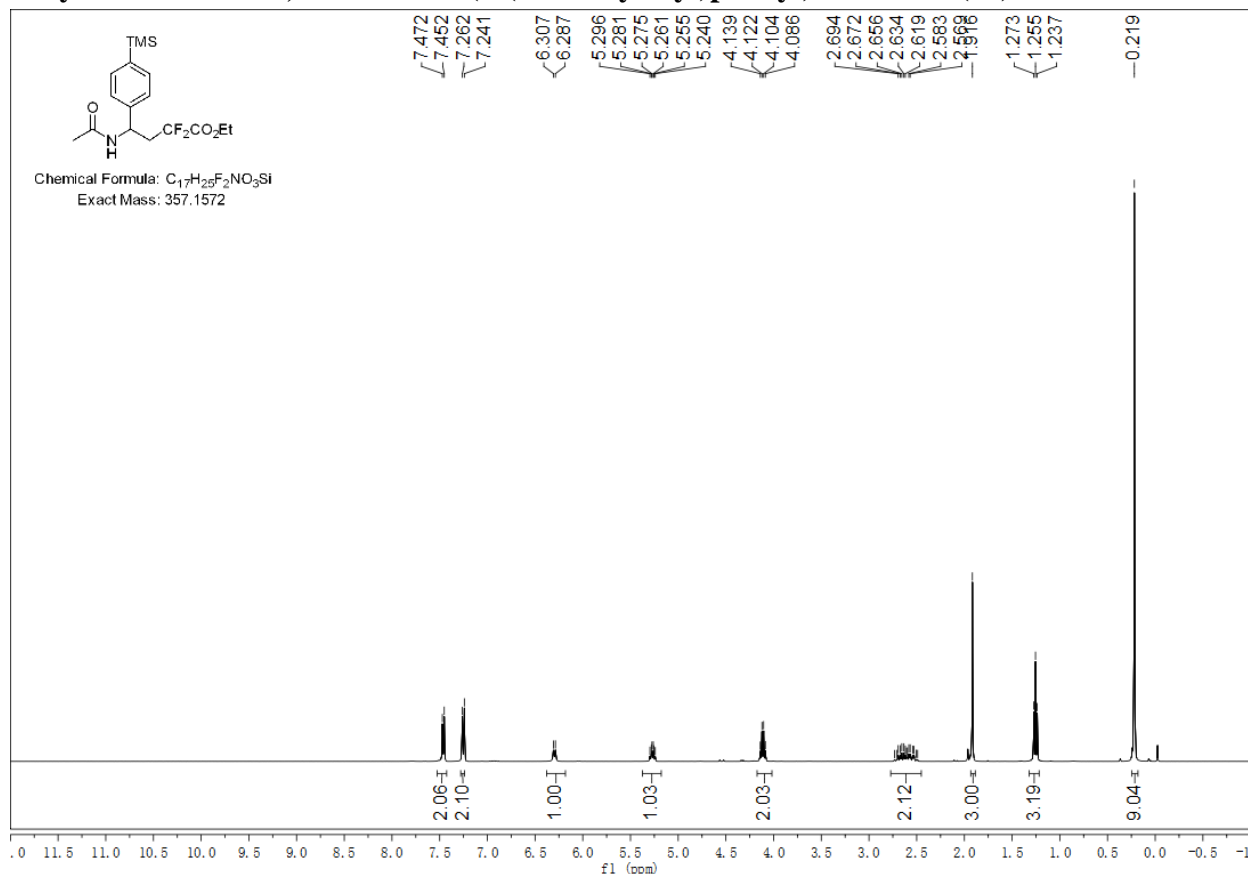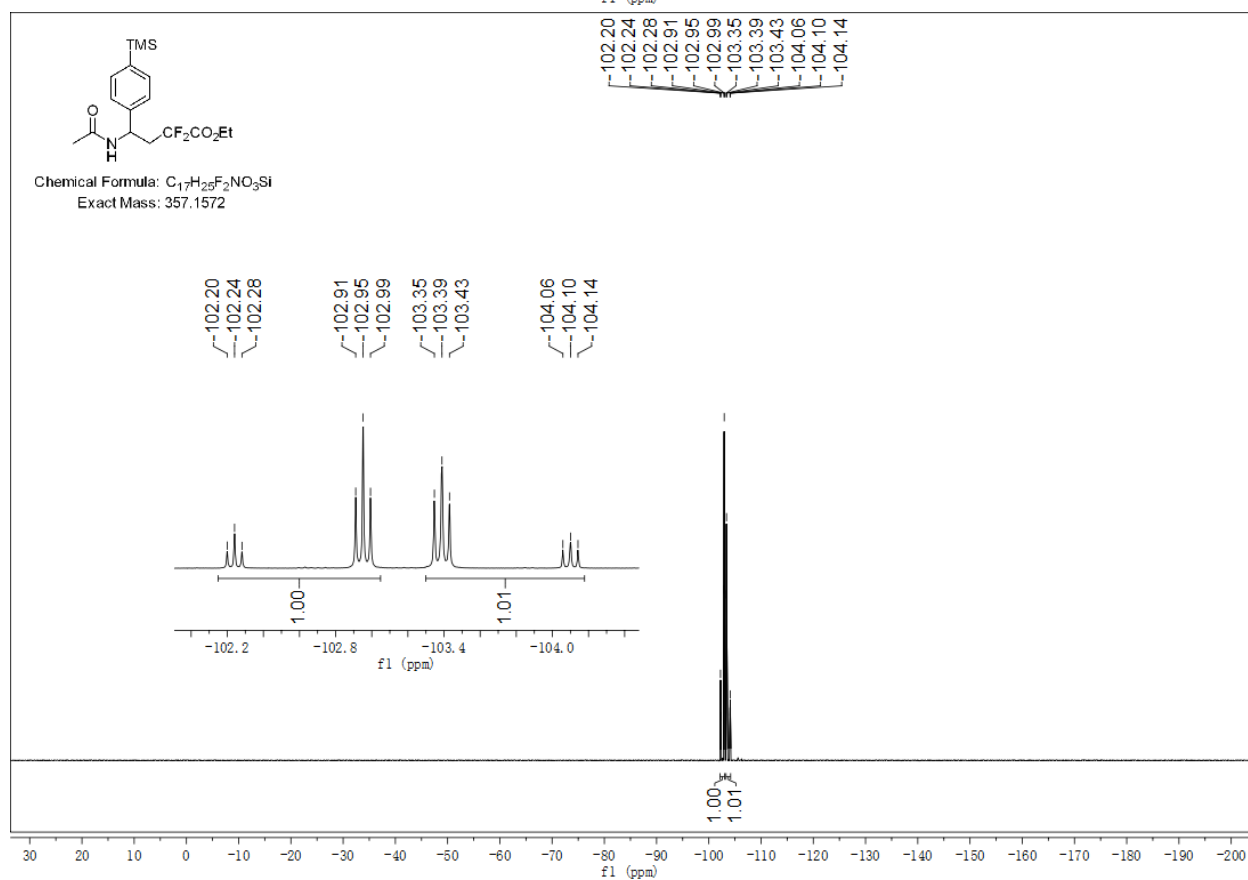

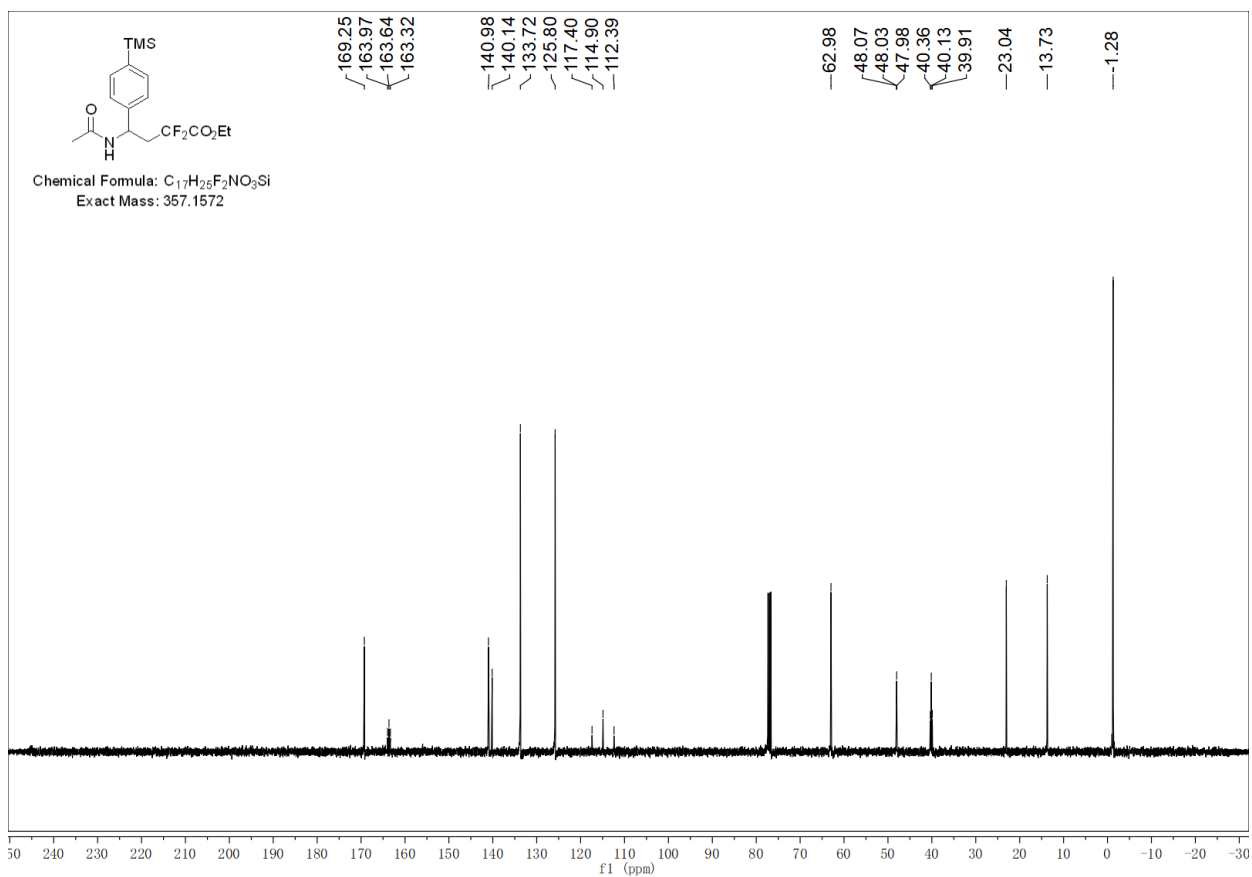

### Ethyl 4-acetamido-4-(4-(ethylthio)phenyl)-2,2-difluorobutanoate (17)

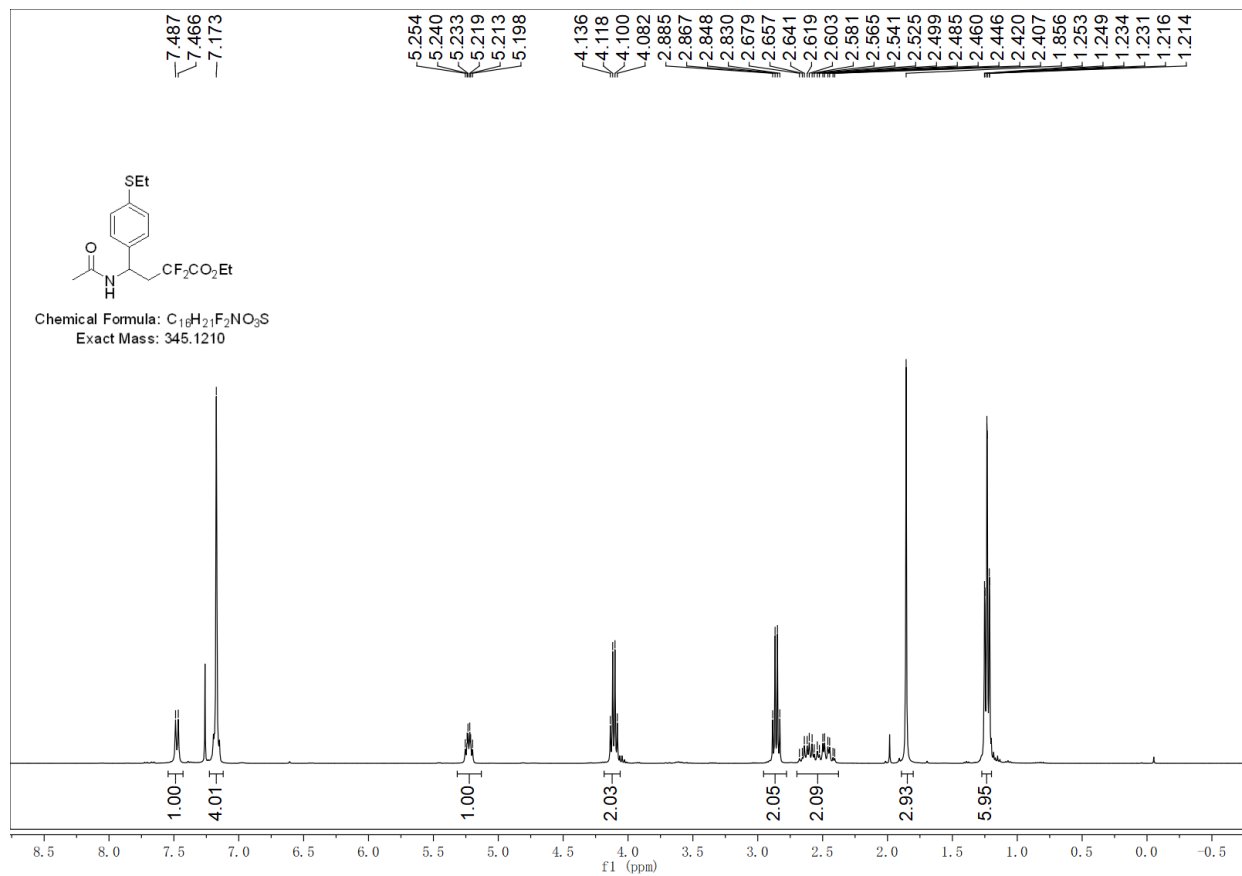

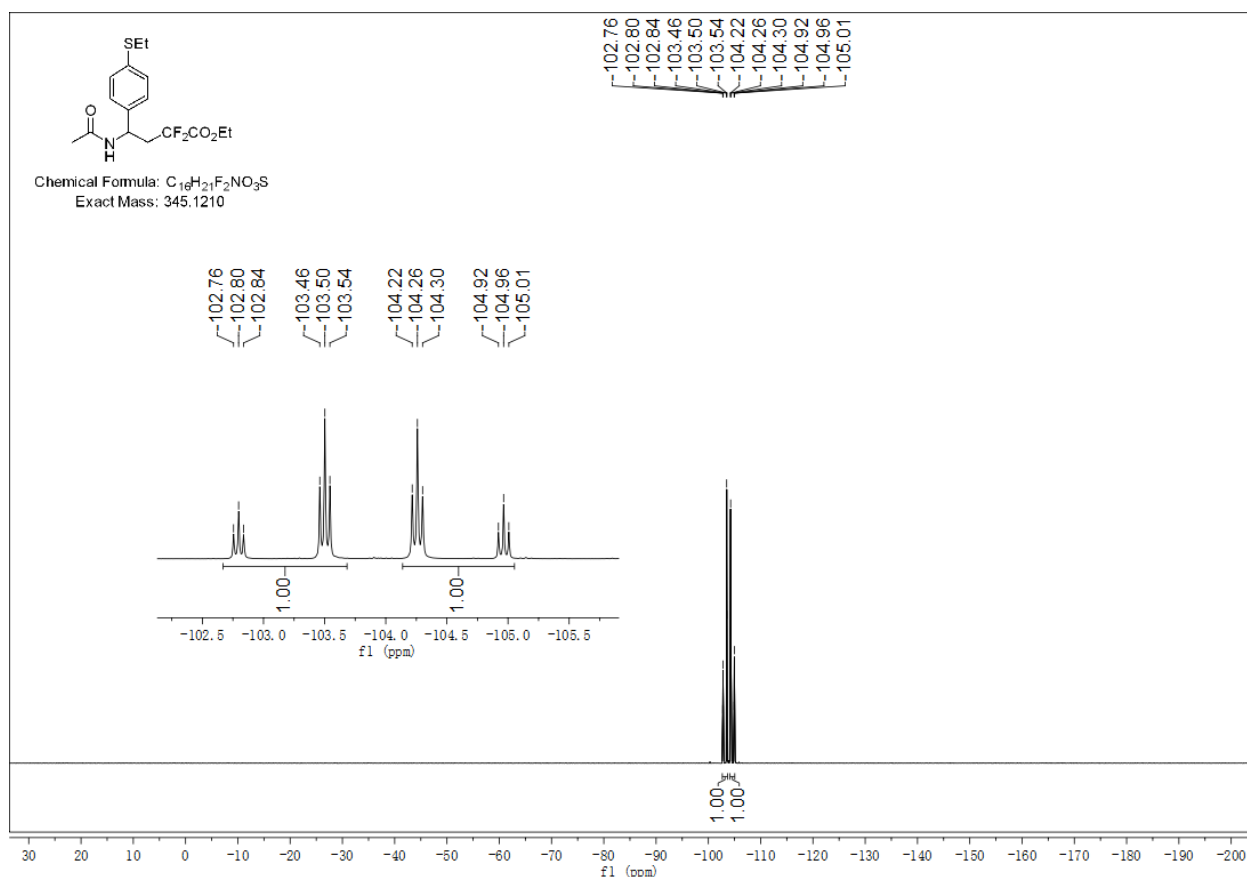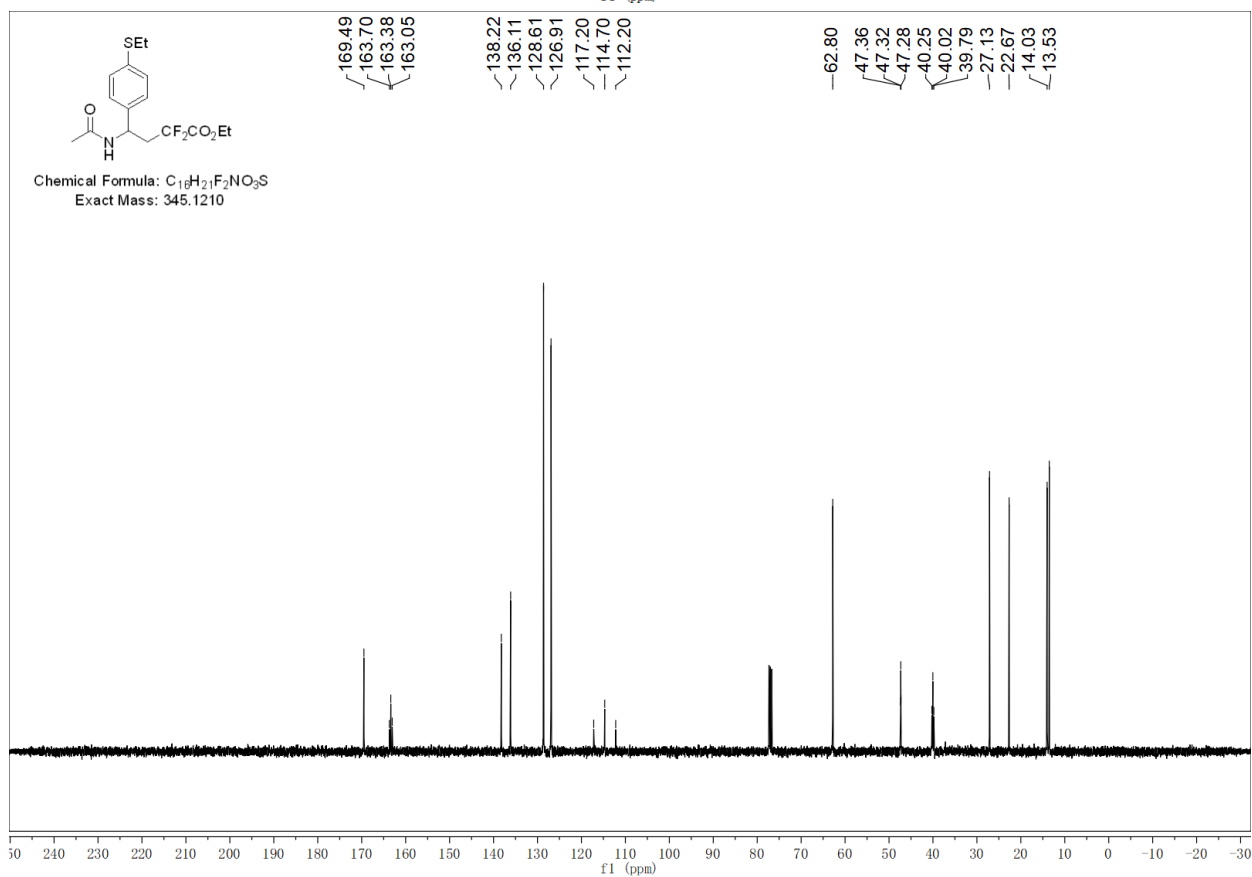



# Ethyl 4-acetamido-4-(4-bromophenyl)-2,2-difluorobutanoate (18)

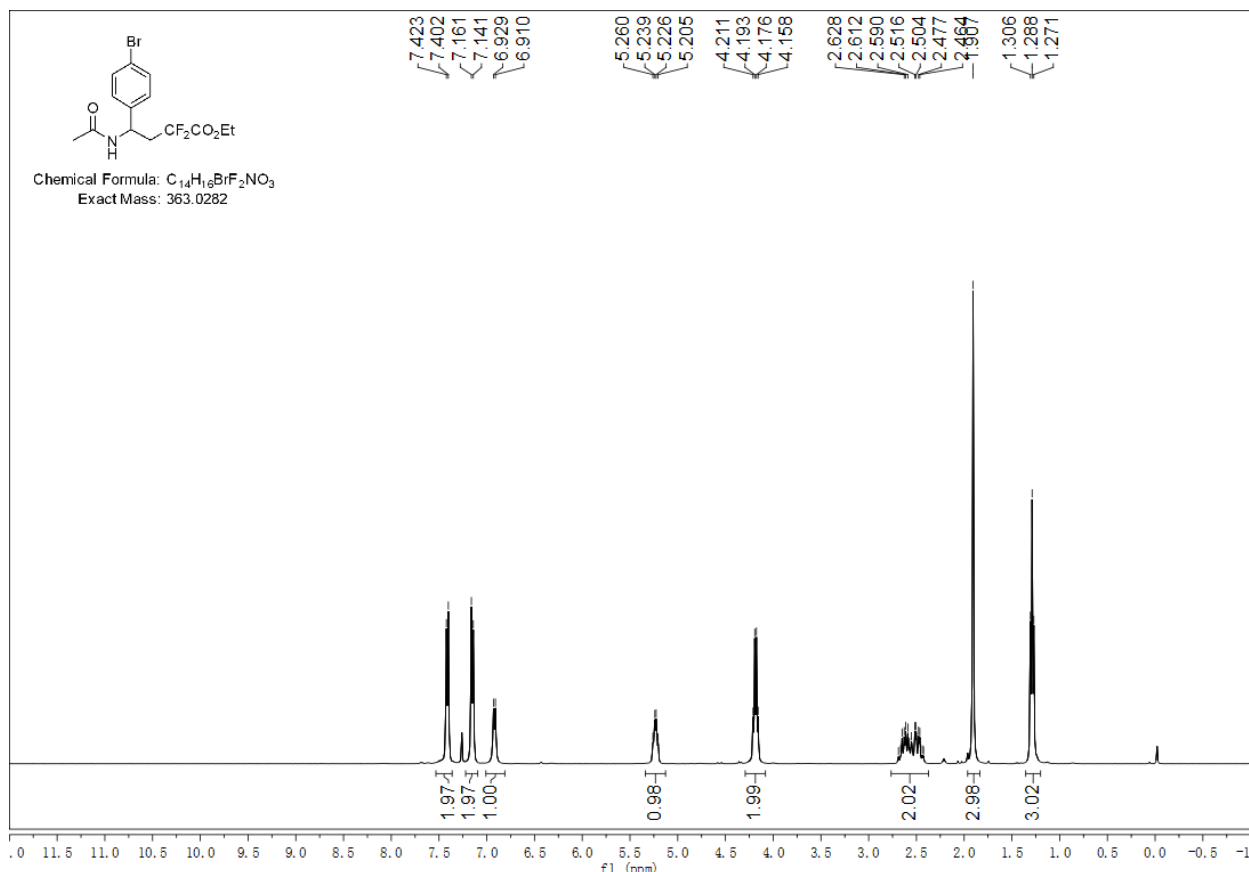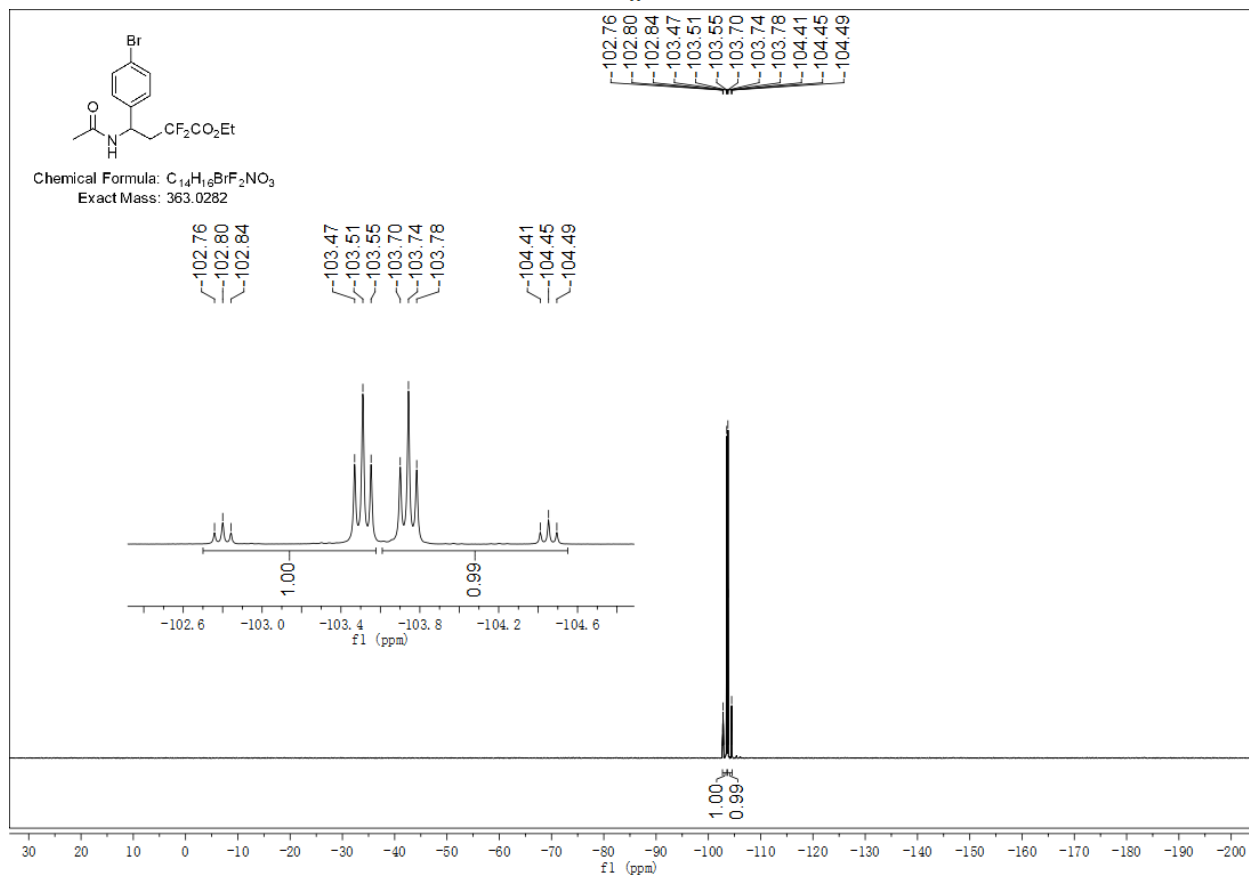

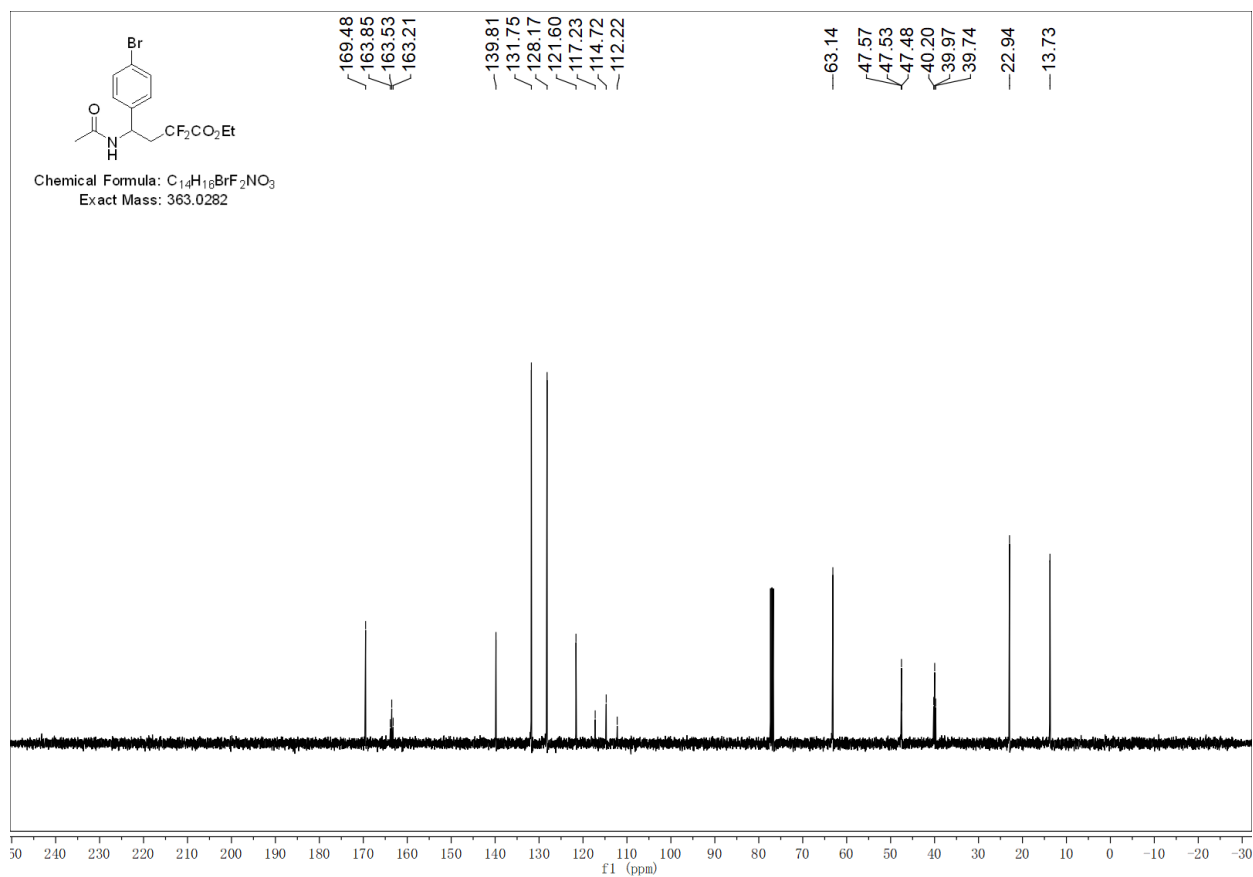

### Ethyl 4-acetamido-2,2-difluoro-4-(3-hydroxyphenyl)butanoate (19)

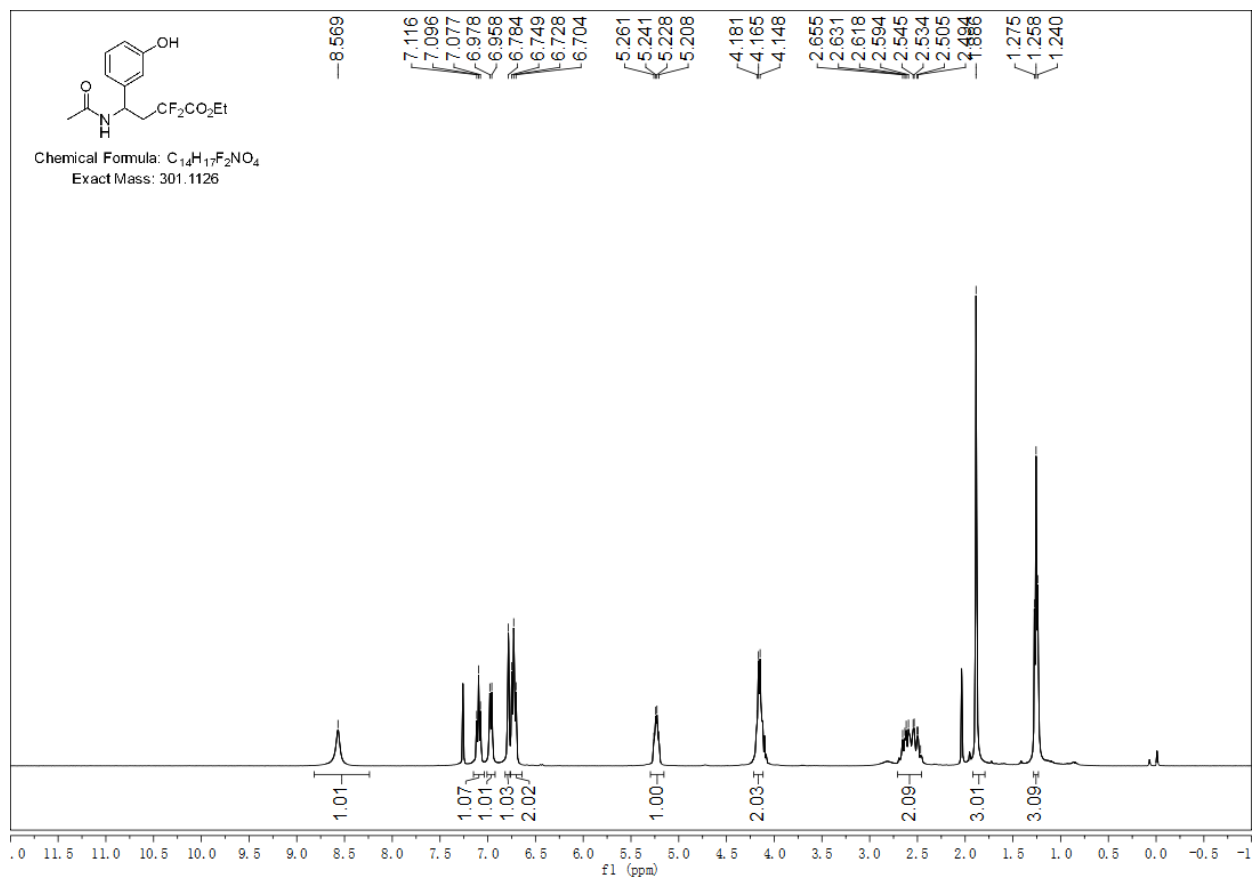

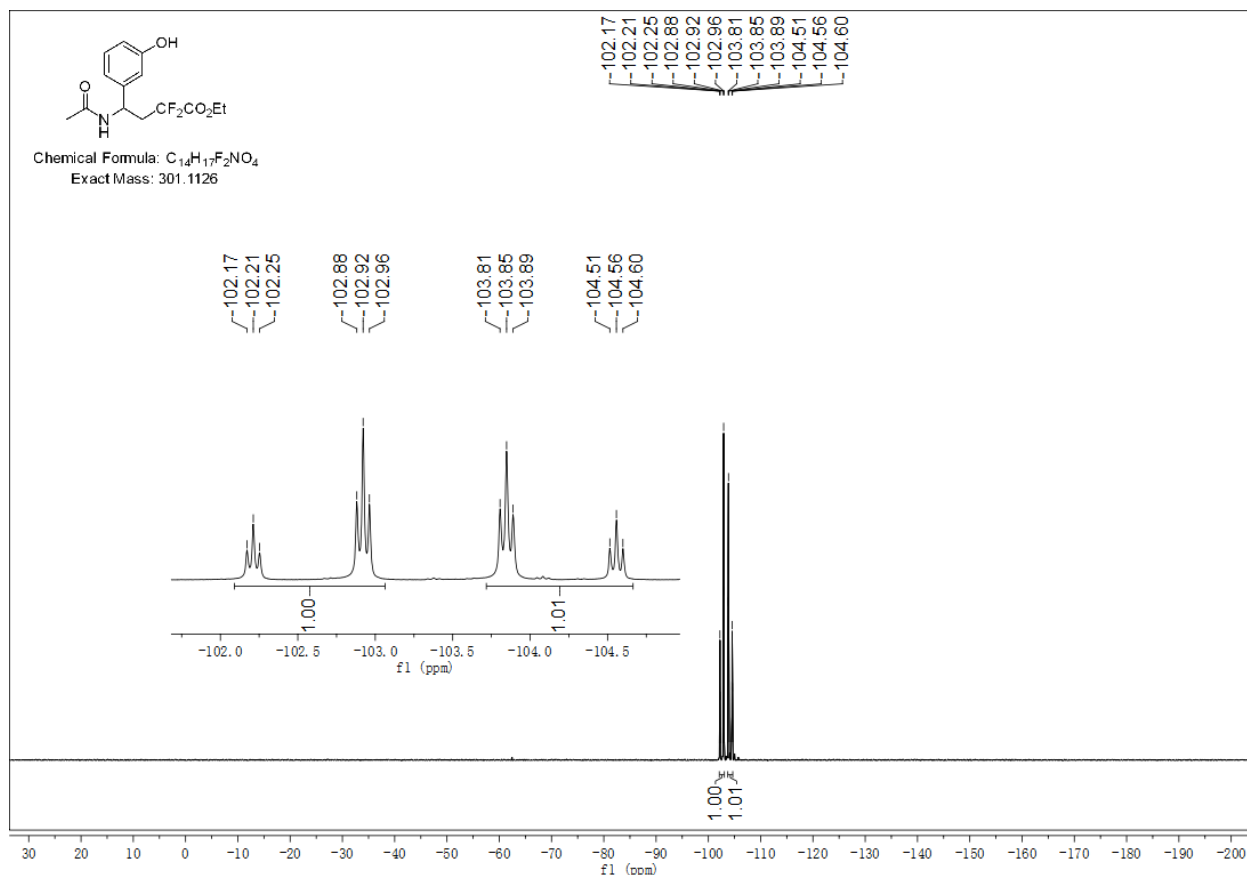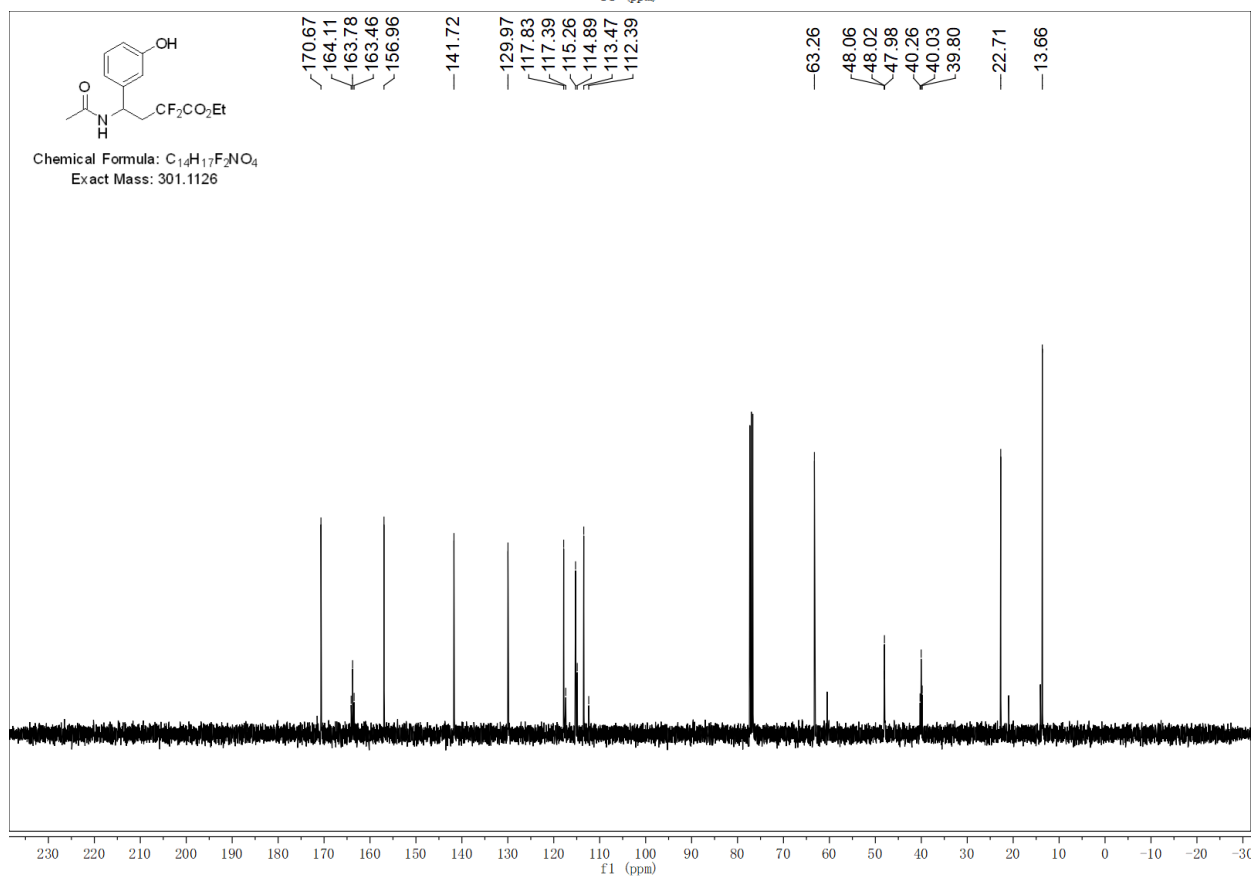

**Ethyl 4-acetamido-4-(dibenzo[b,d]furan-4-yl)-2,2-difluorobutanoate (20)**

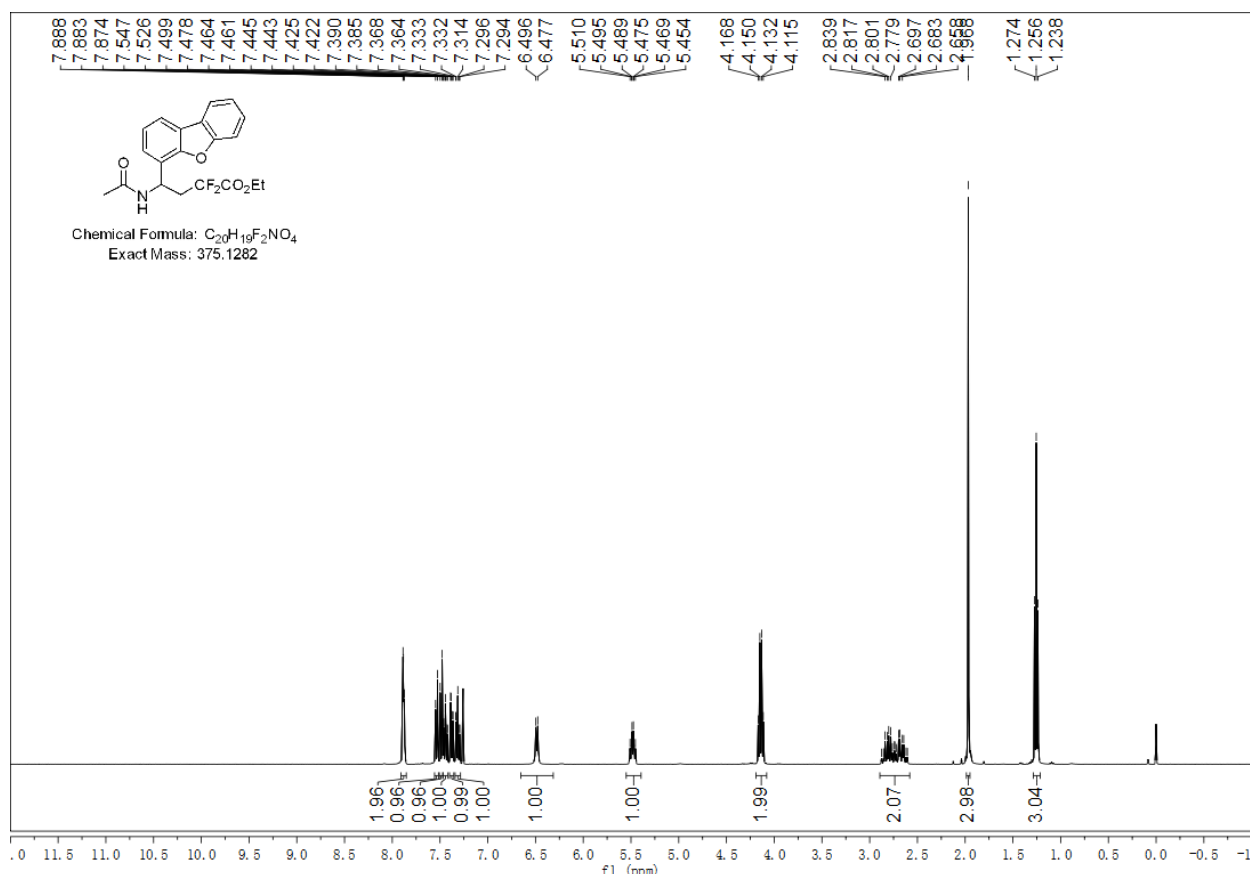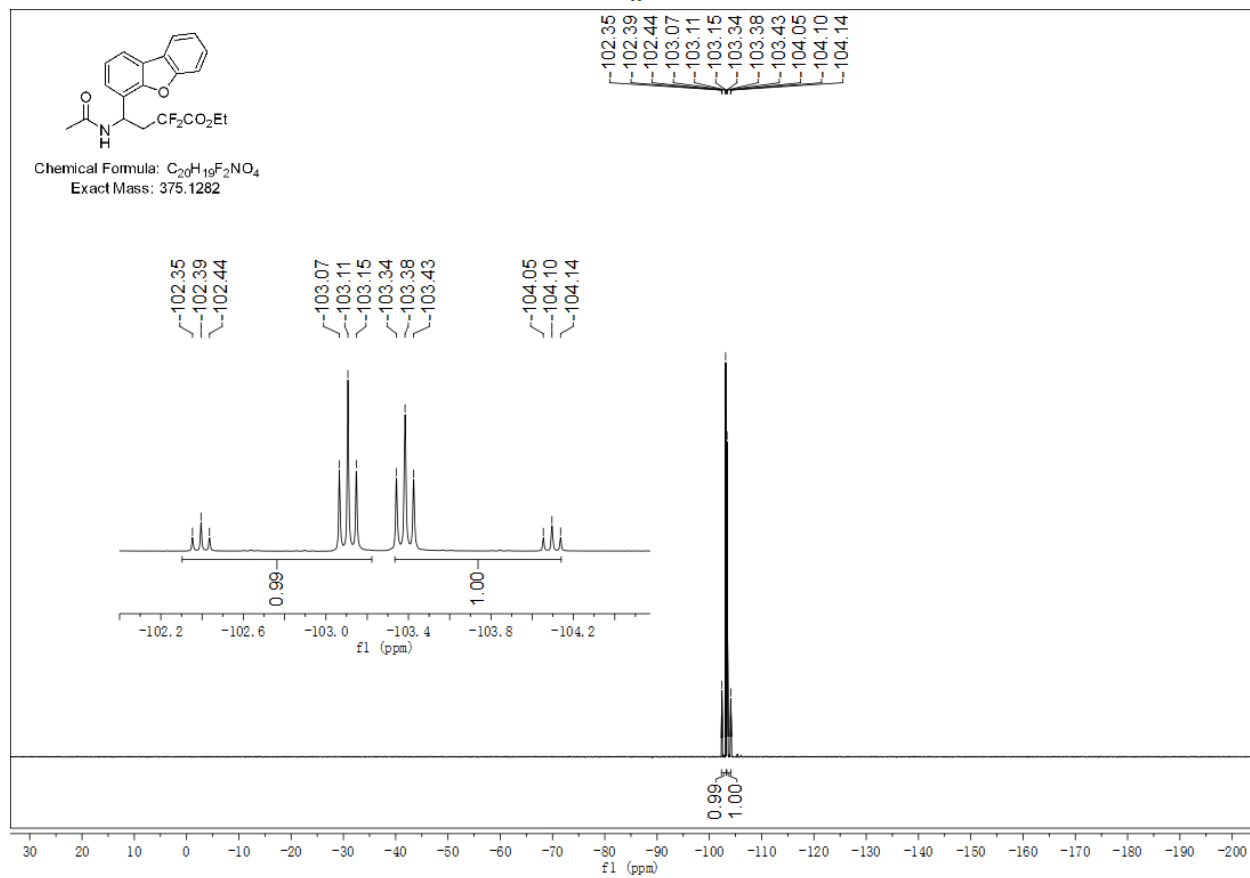

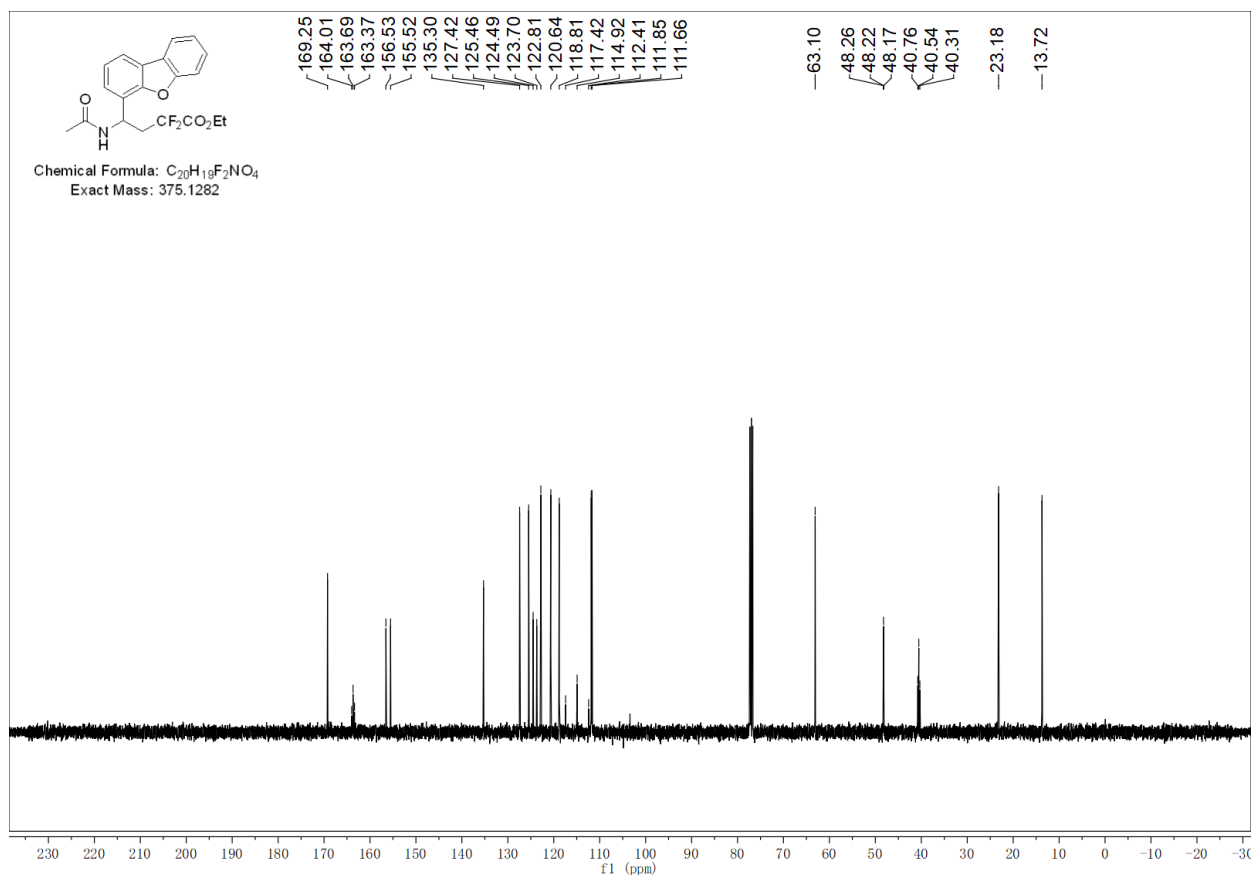

**Ethyl 4-([1,1'-biphenyl]-4-yl)-2,2-difluoro-4-formamidobutanoate (21)**

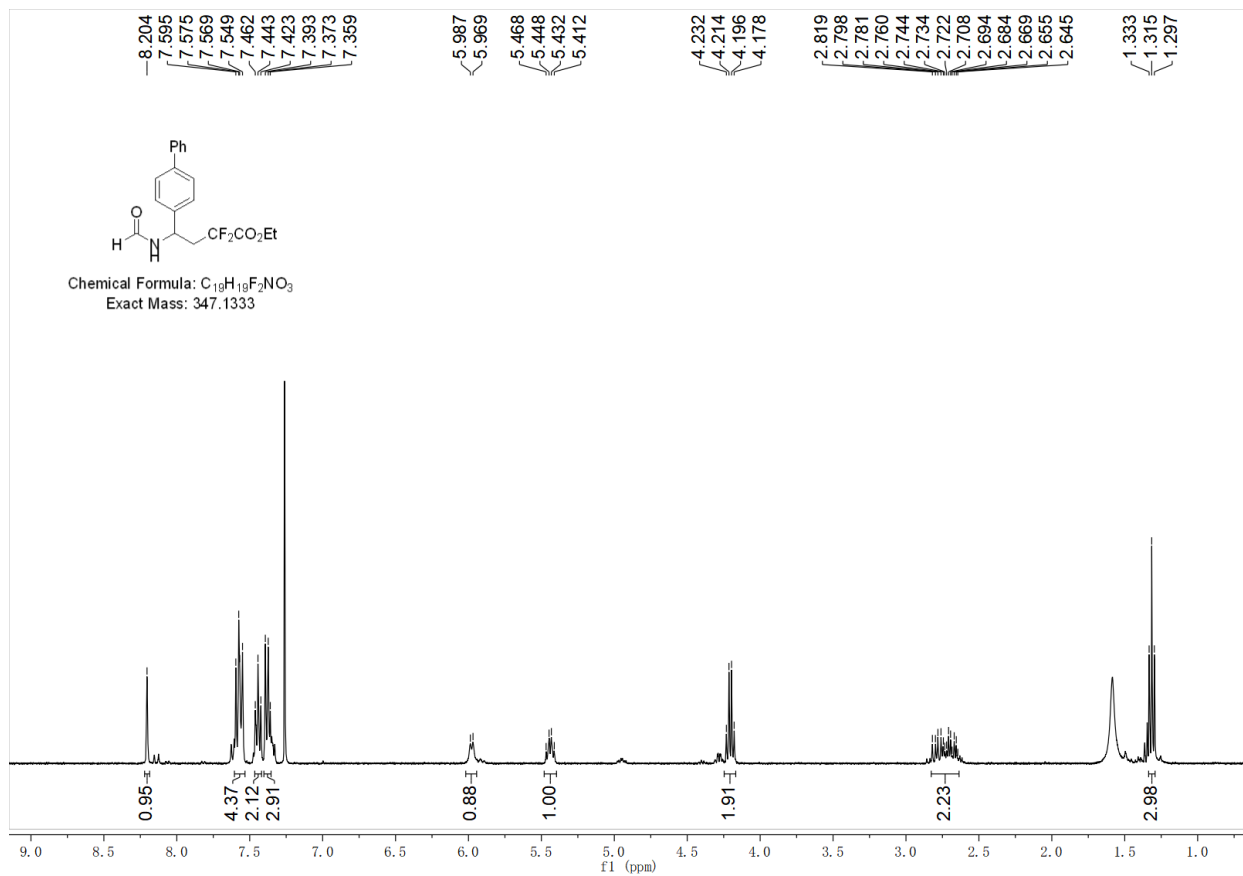

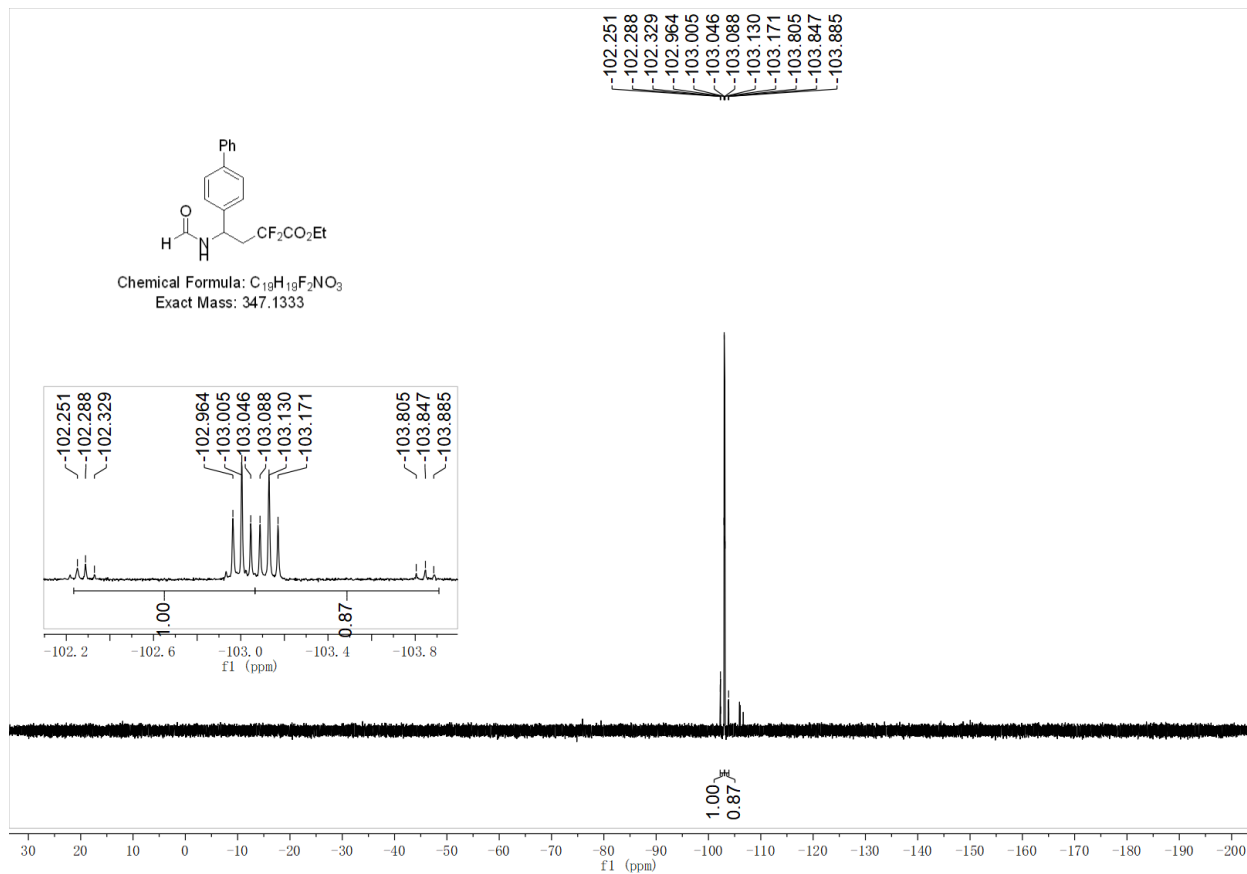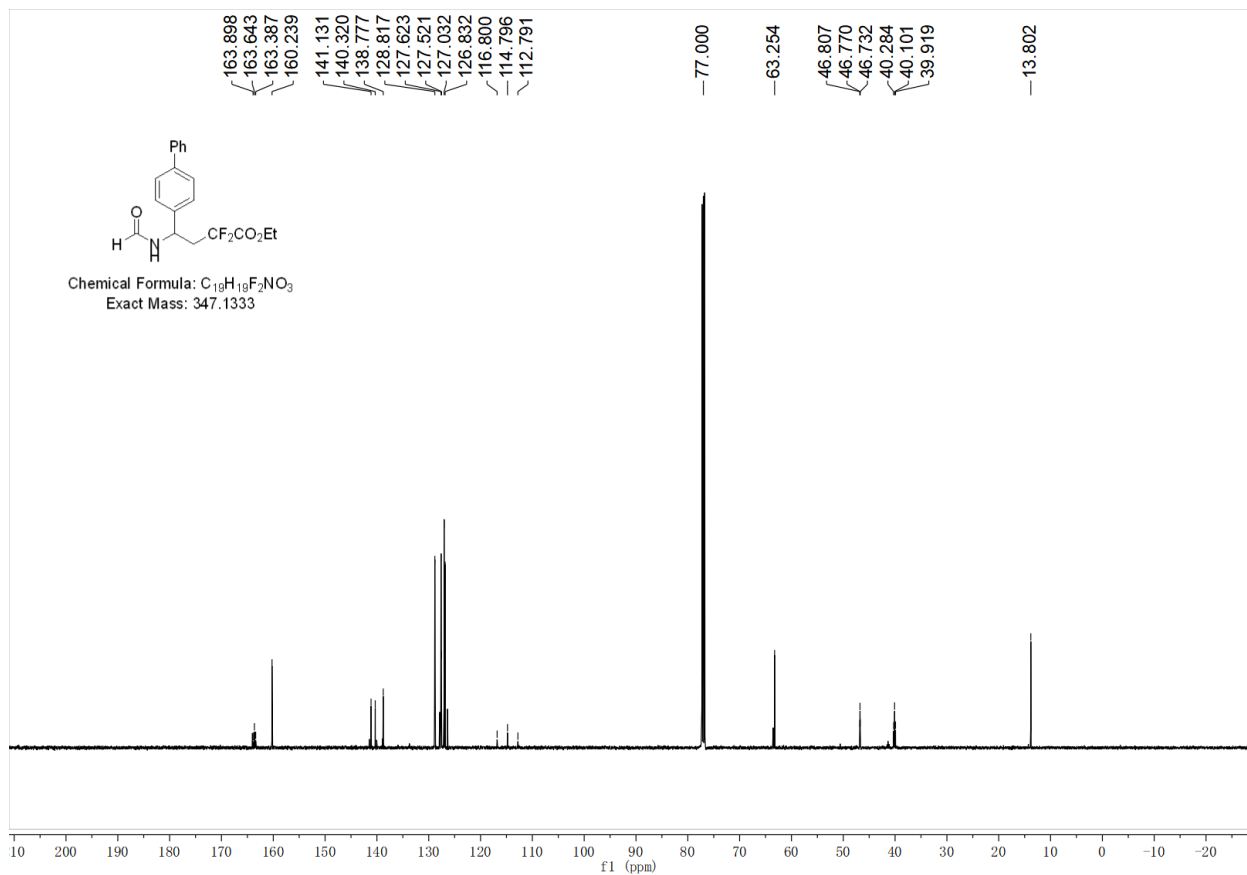

**Ethyl 4-([1,1'-biphenyl]-4-yl)-4-((tert-butoxycarbonyl)amino)-2,2-difluorobutanoate (22)**

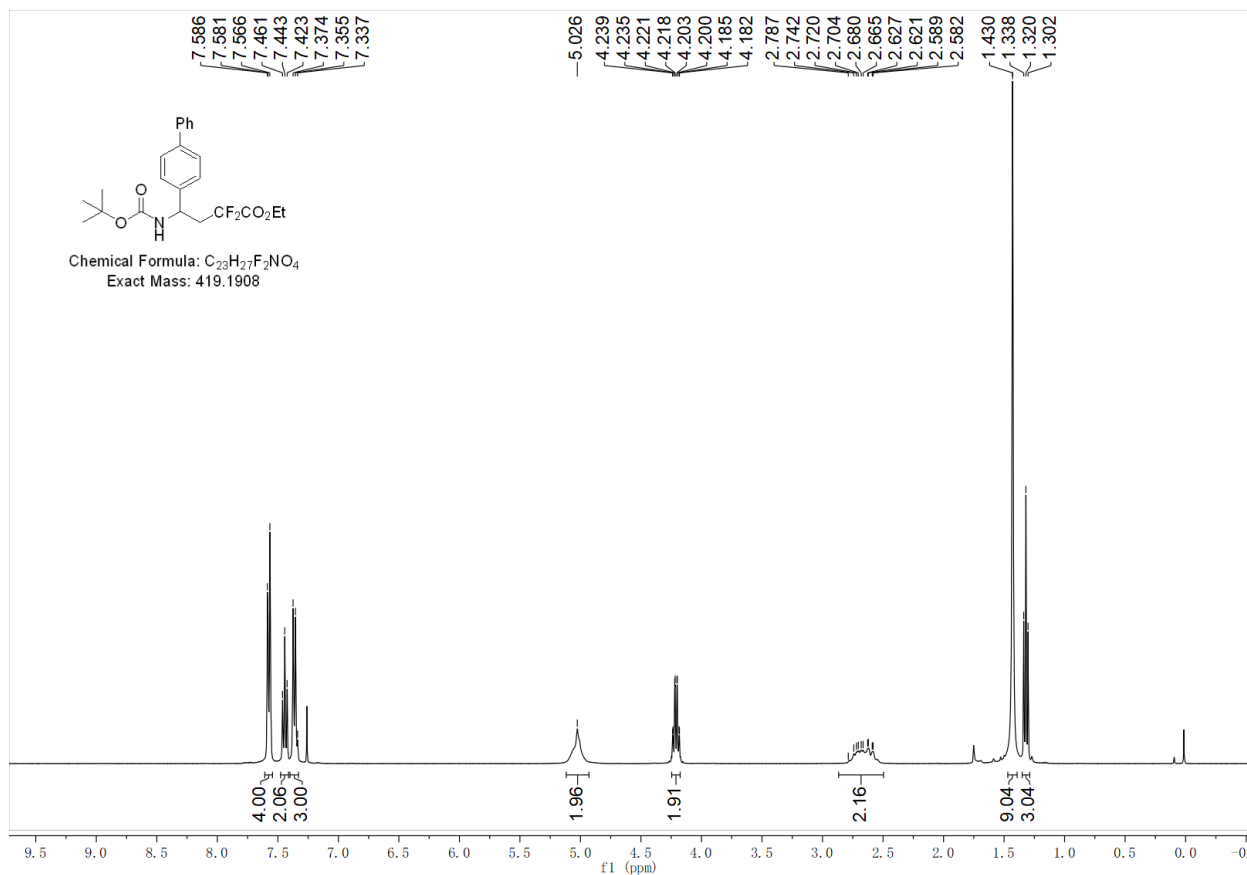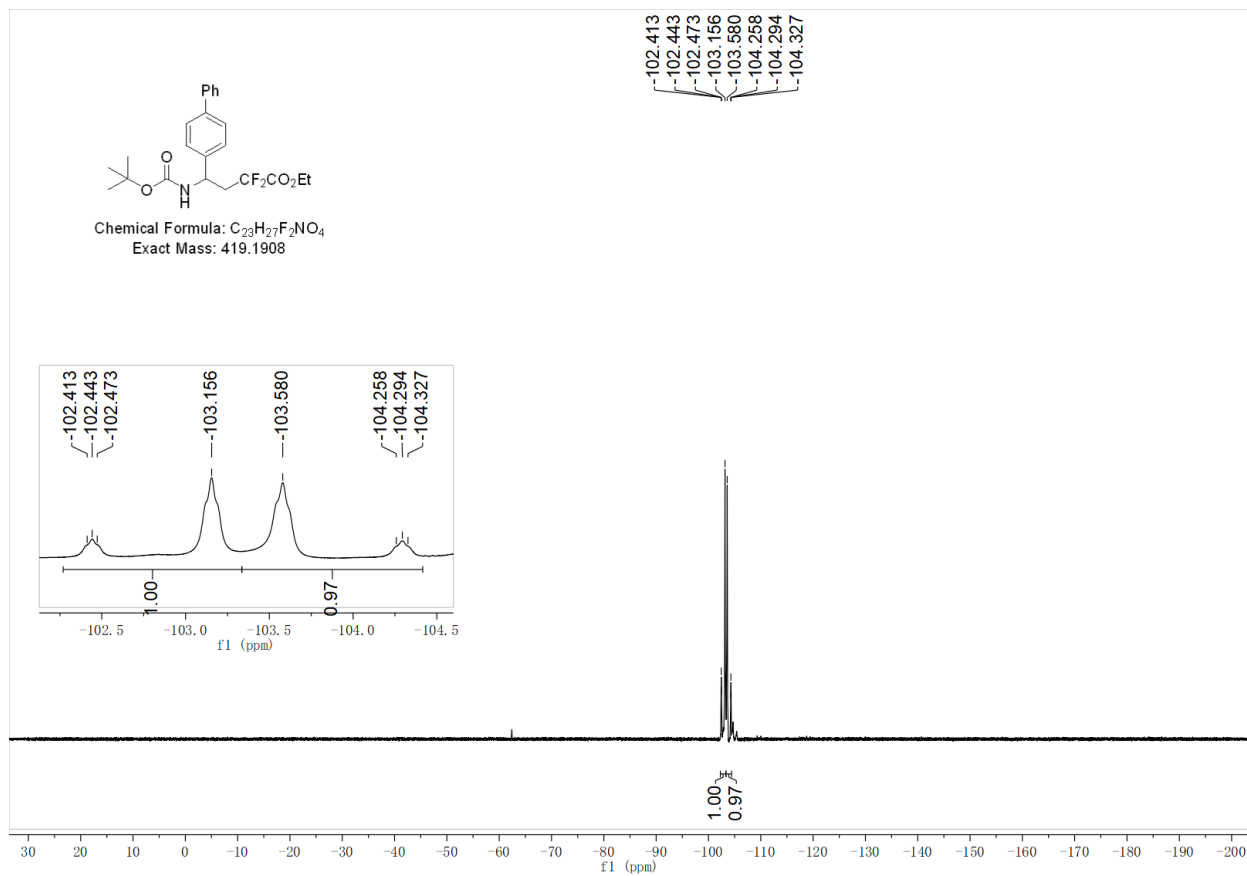

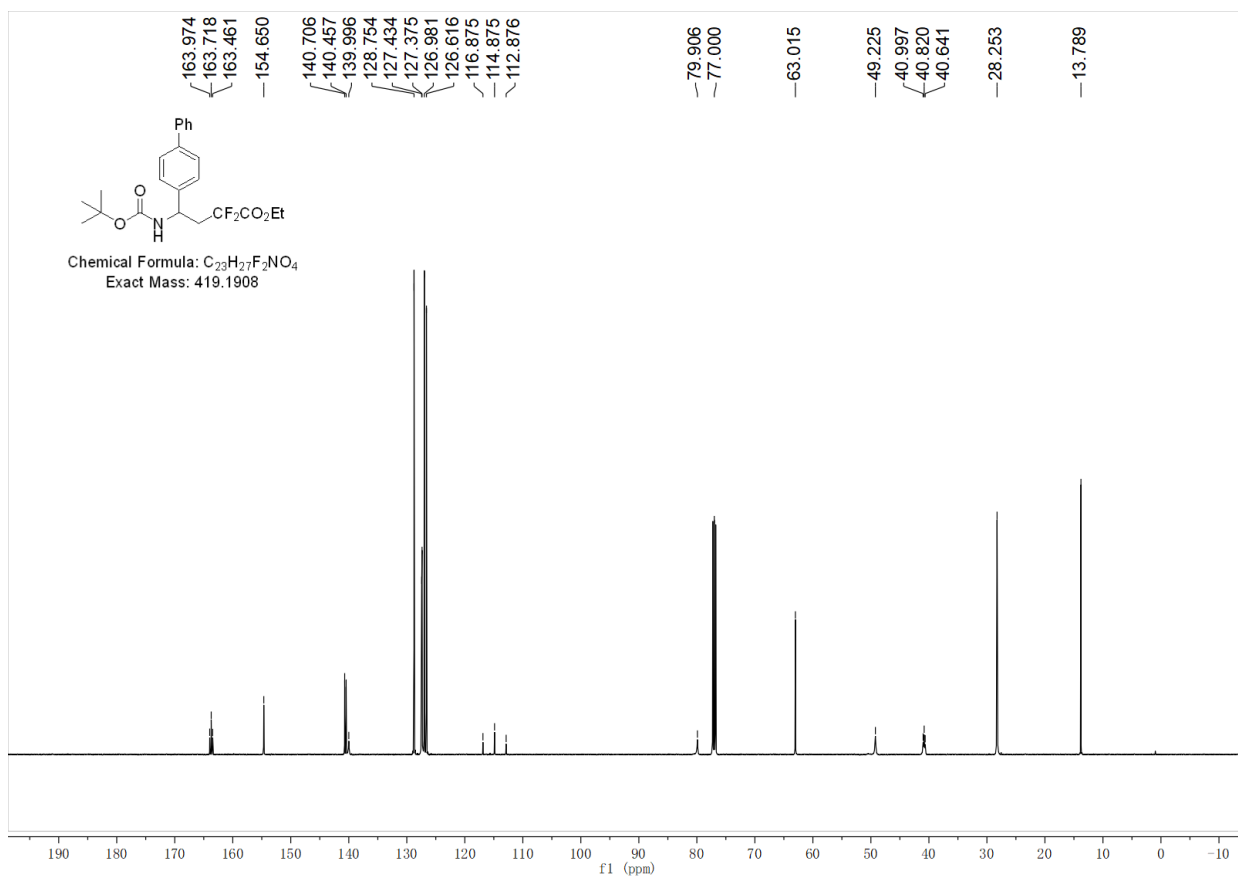

**Ethyl 4-([1,1'-biphenyl]-4-yl)-2,2-difluoro-4-propionamidobutanoate (23)**

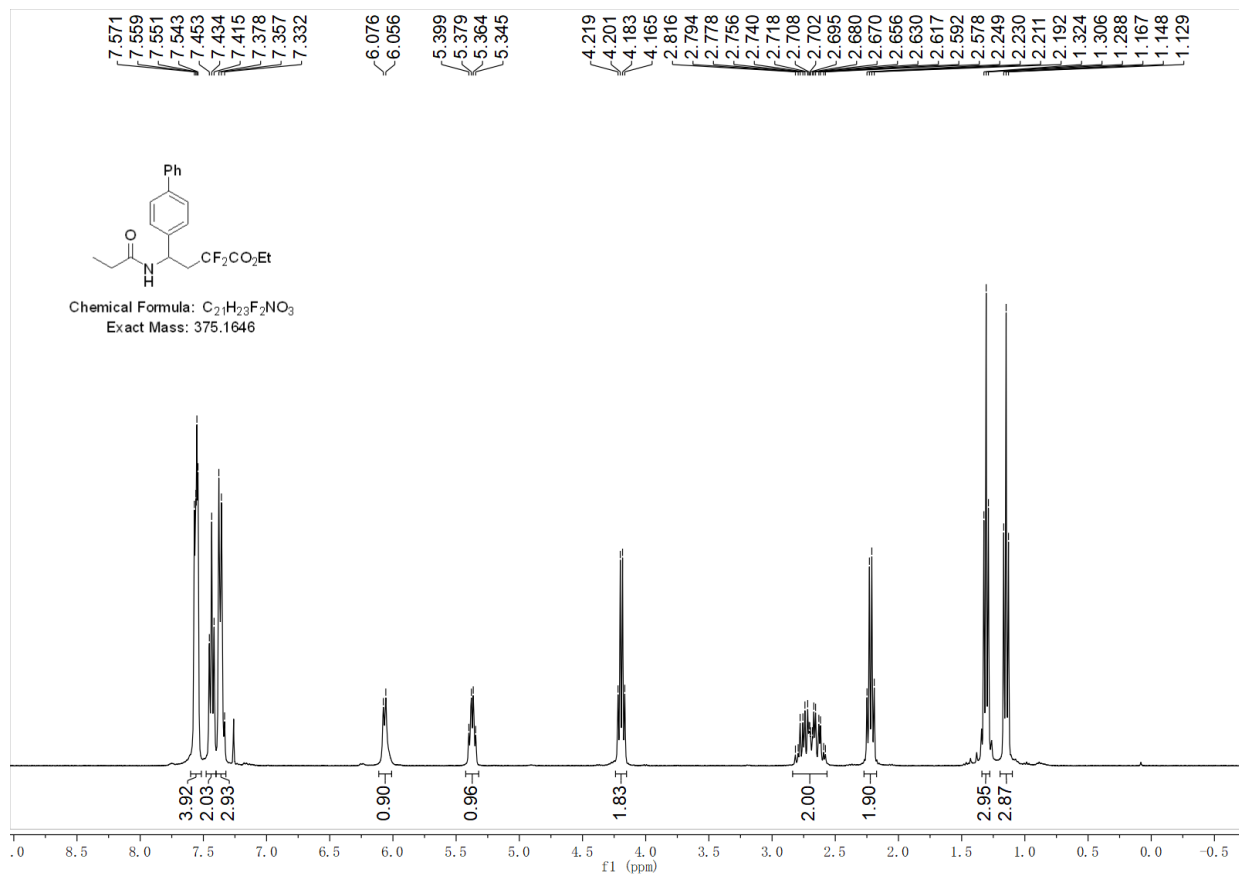



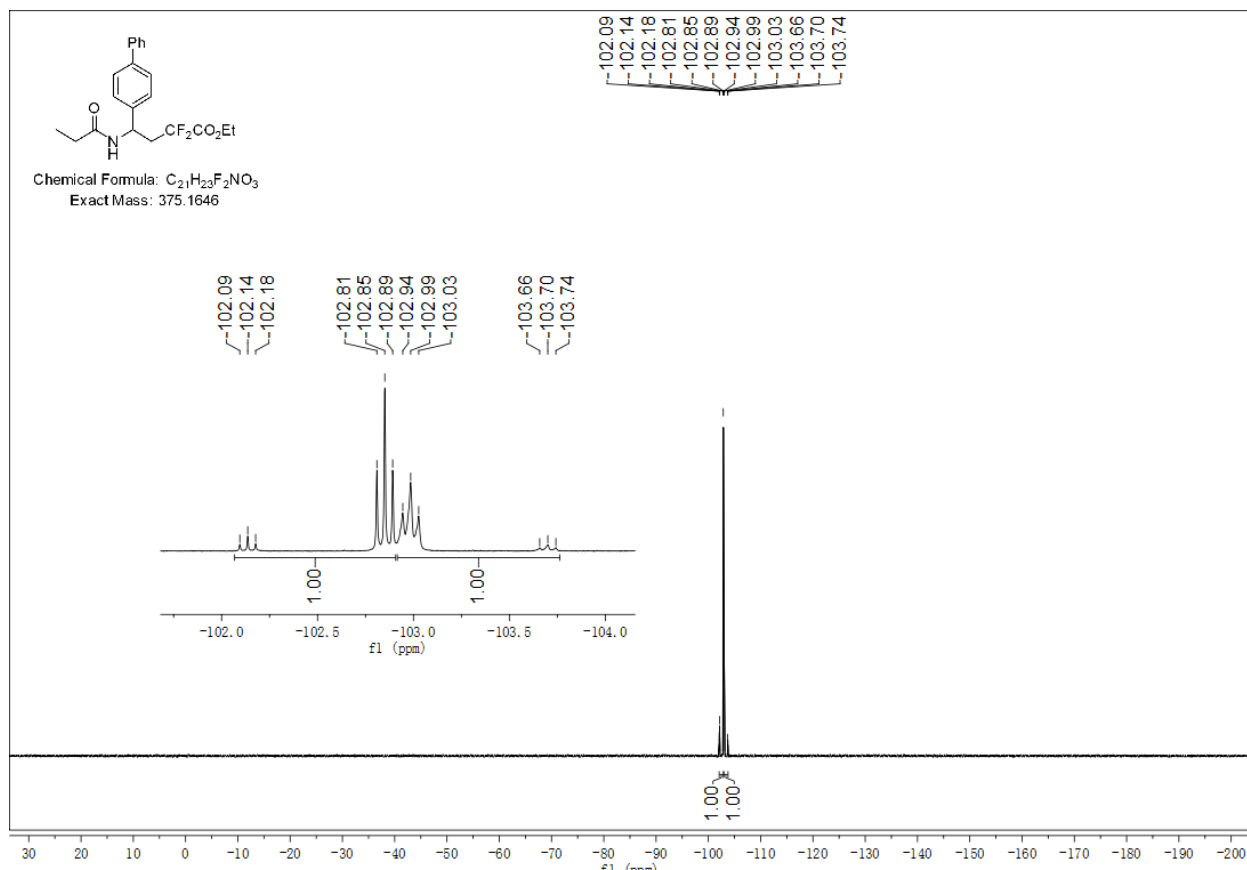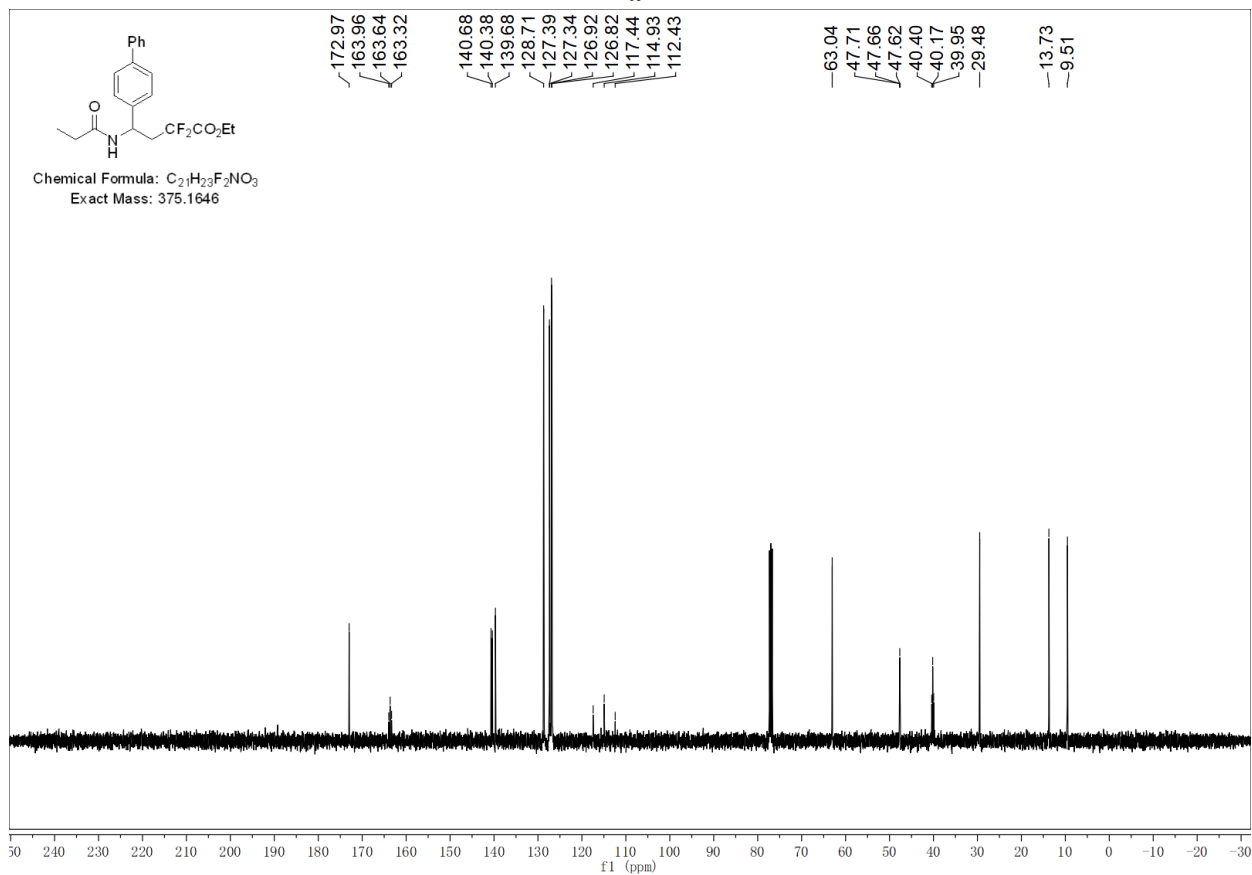

# Ethyl 4-([1,1'-biphenyl]-4-yl)-4-butylamido-2,2-difluorobutanoate (24)

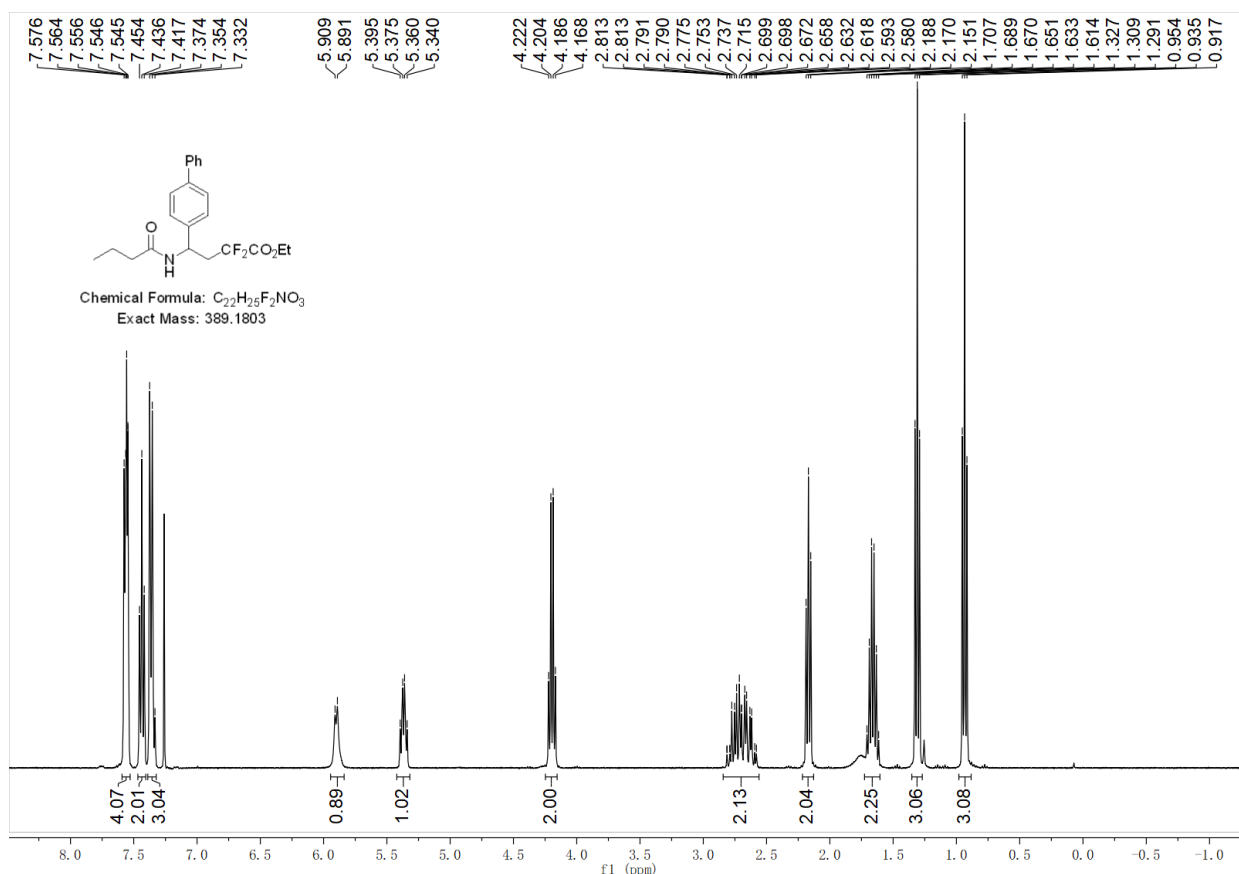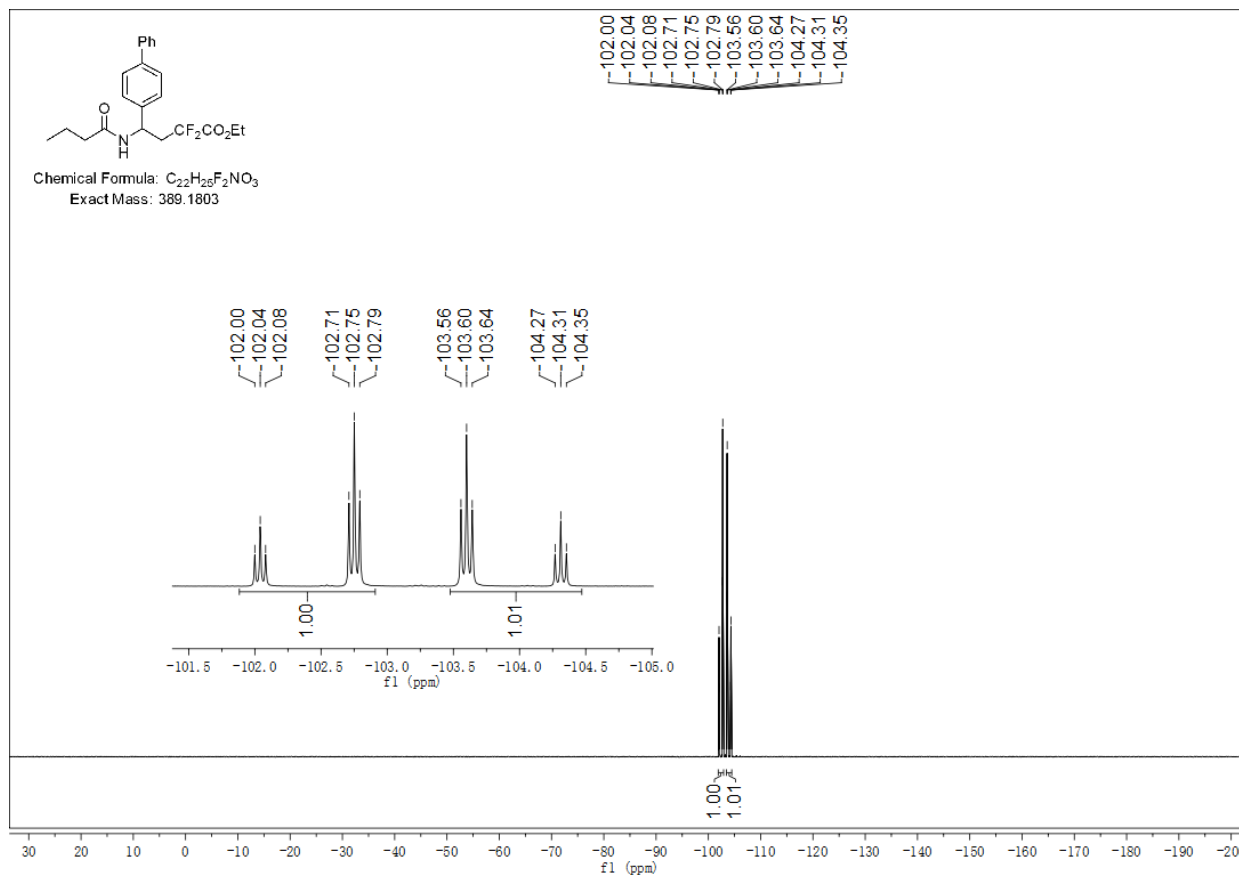

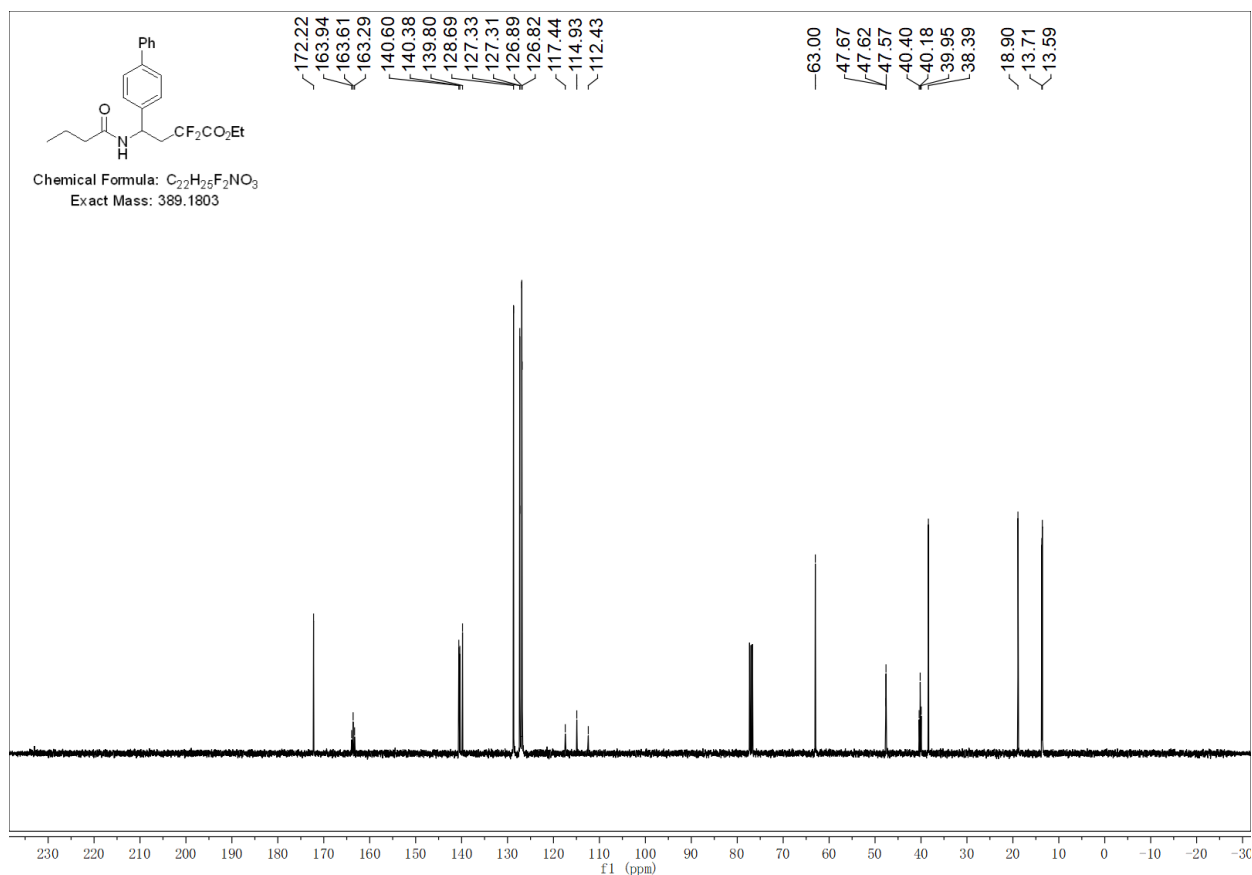

**Ethyl 4-([1,1'-biphenyl]-4-yl)-2,2-difluoro-4-isobutyramidobutanoate (25)**

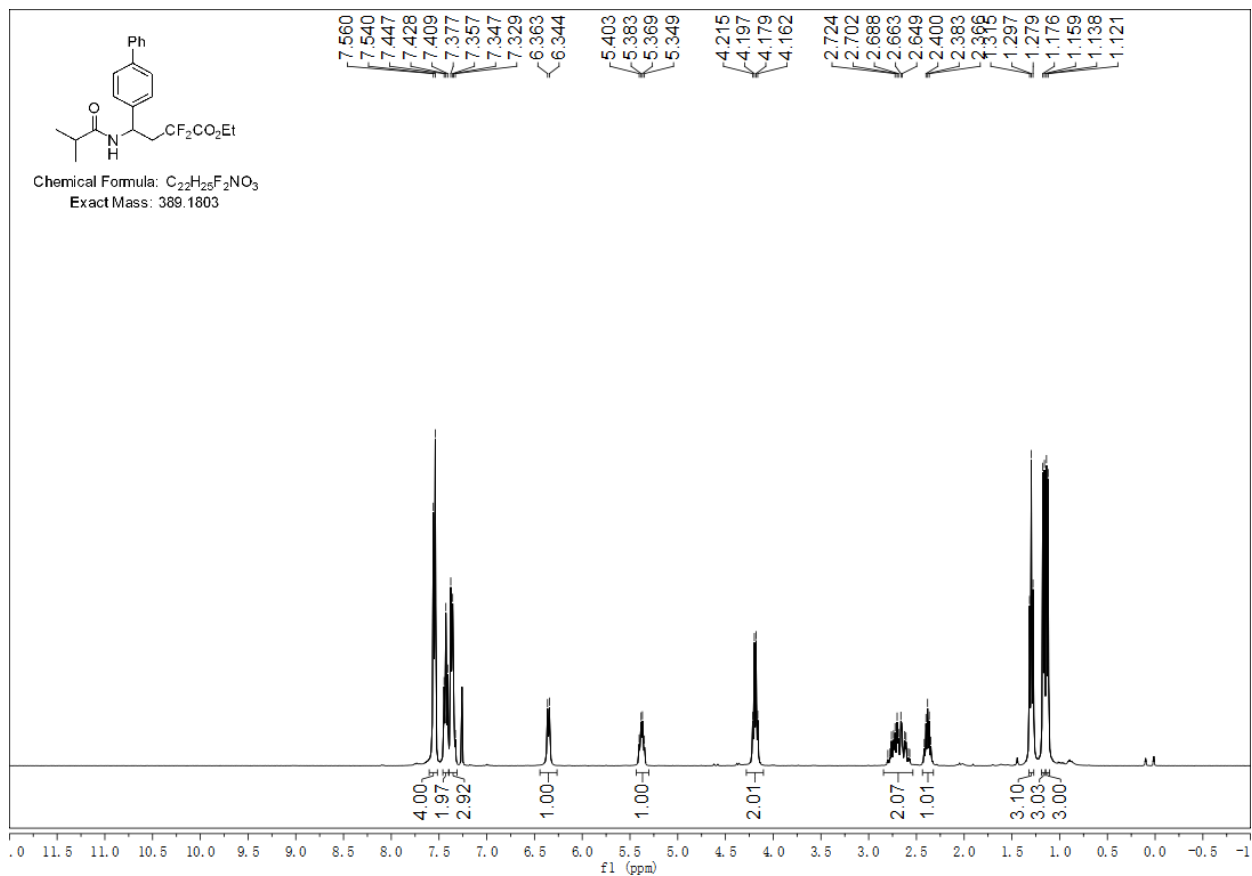

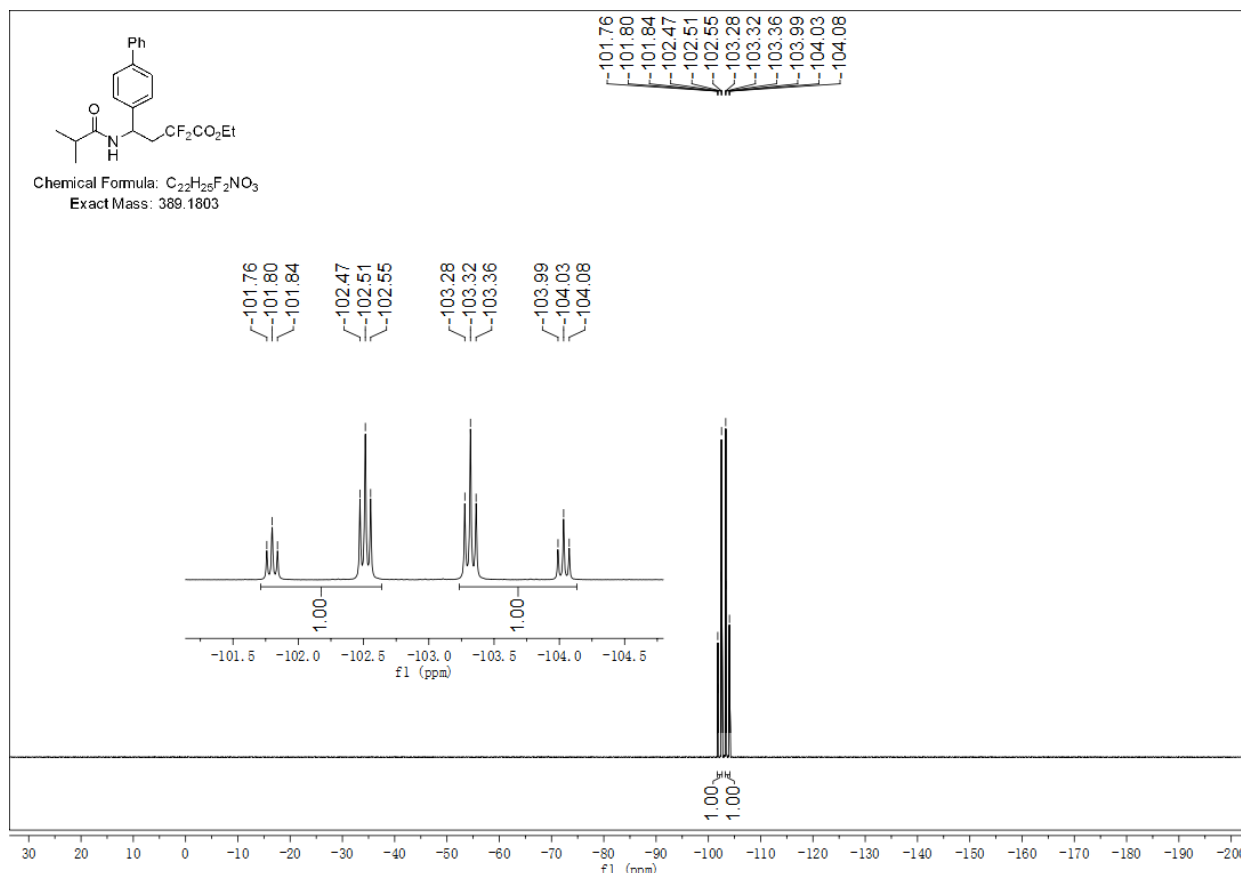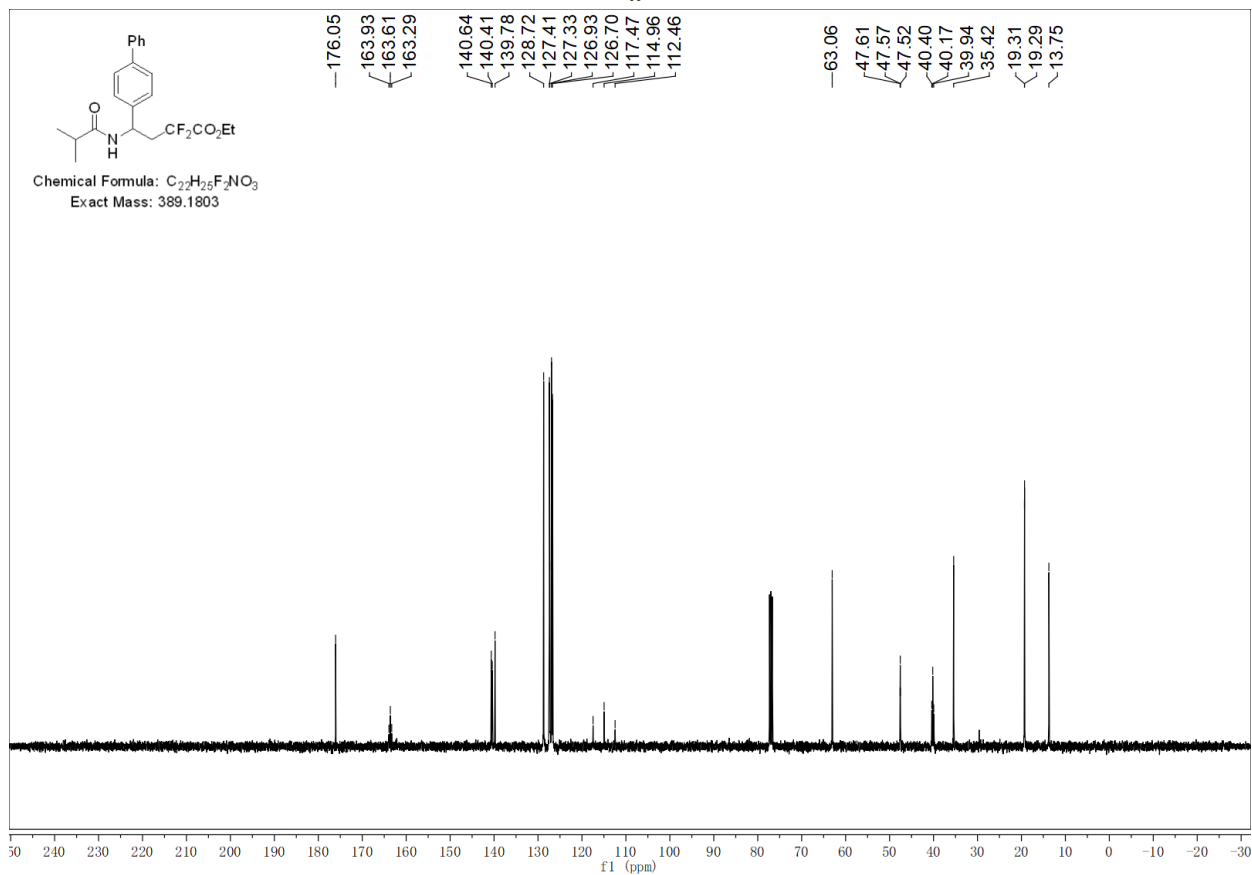

**Ethyl 4-([1,1'-biphenyl]-4-yl)-4-(cyclobutanecarboxamido)-2,2-difluorobutanoate (26)**

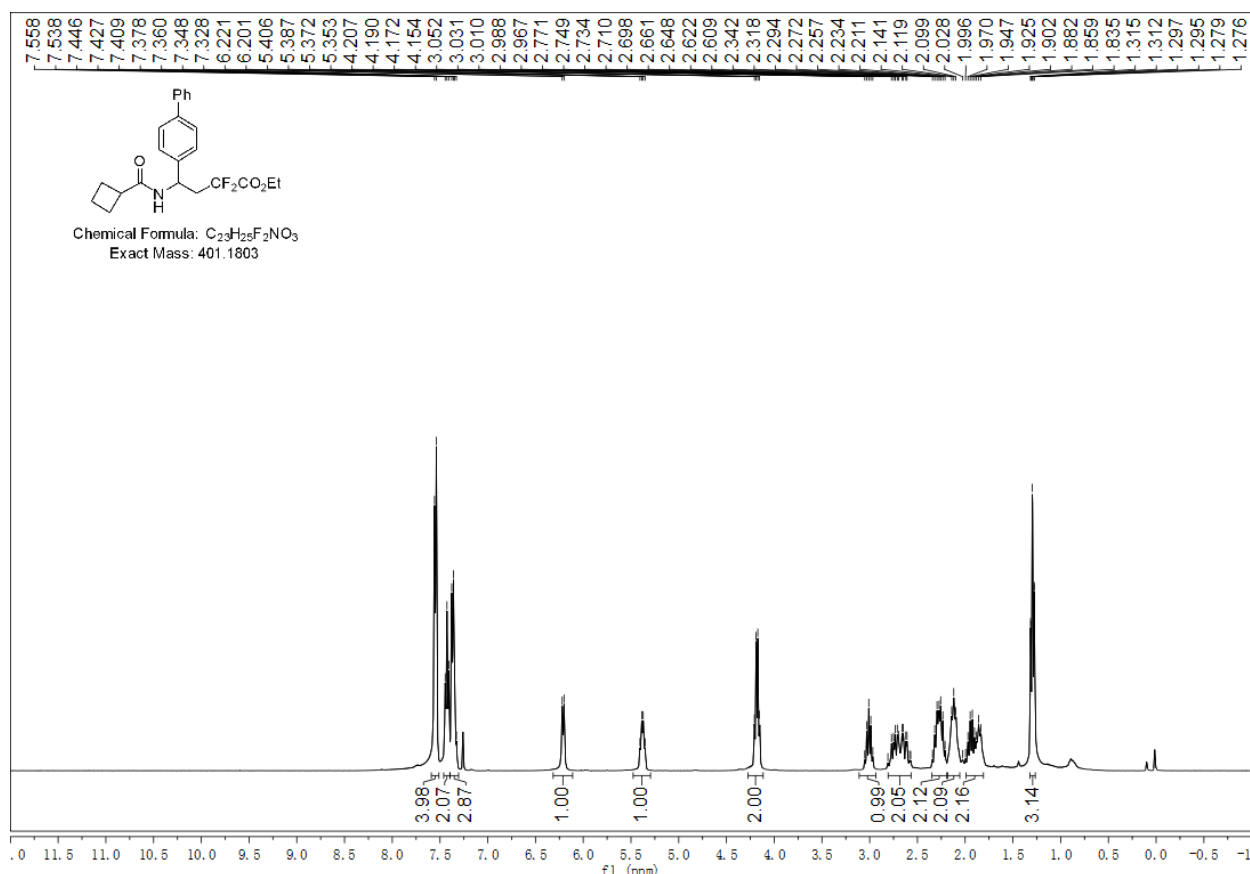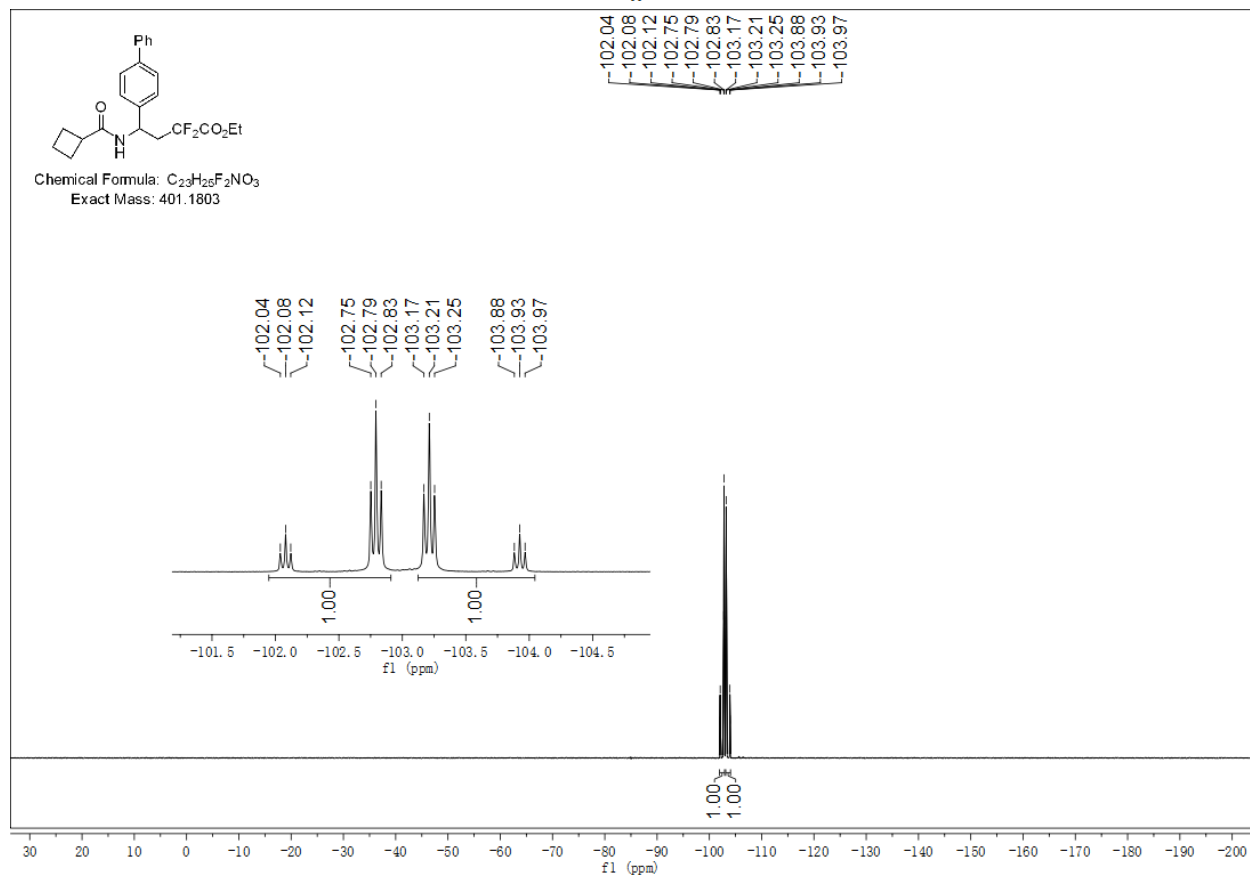

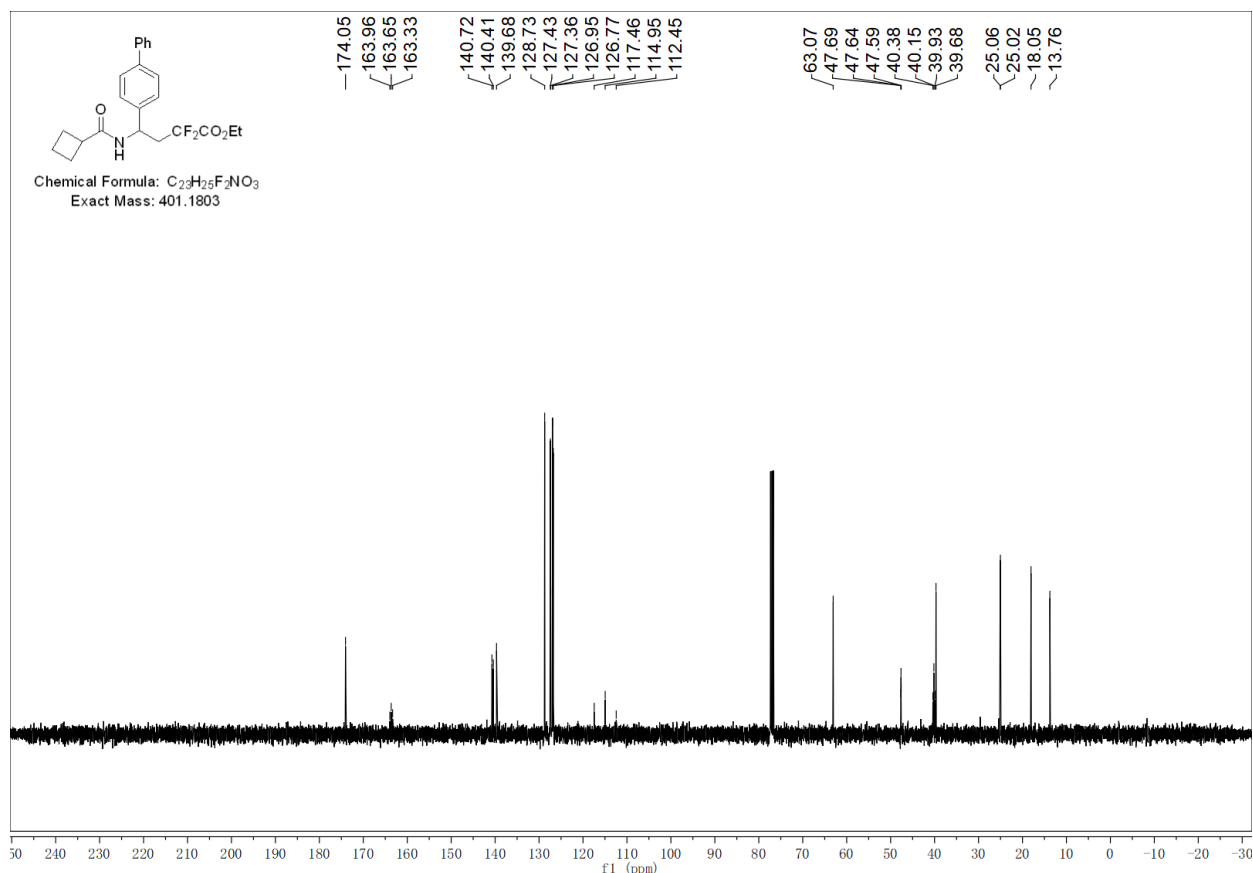

**Ethyl 4-([1,1'-biphenyl]-4-yl)-2,2-difluoro-4-(thiophene-2-carboxamido)butanoate (27)**

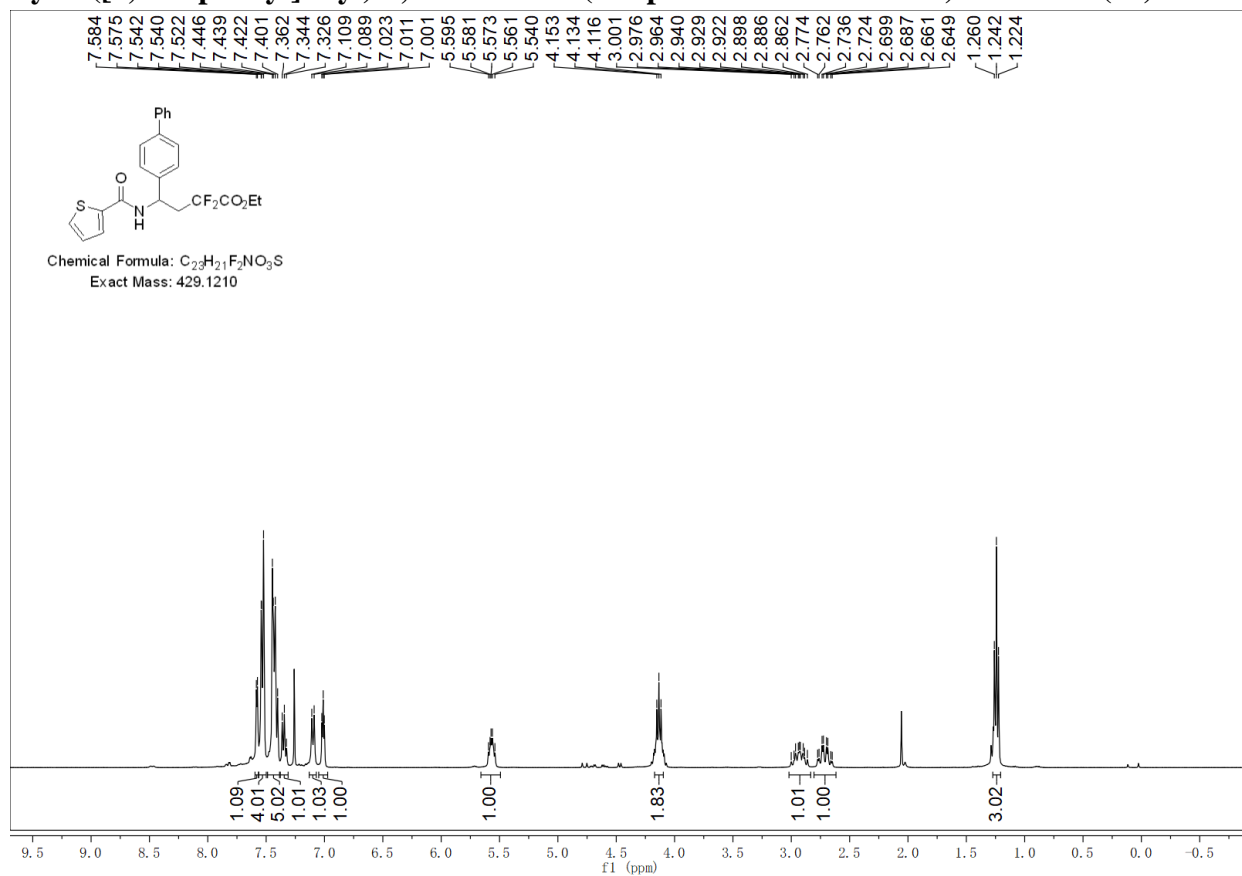

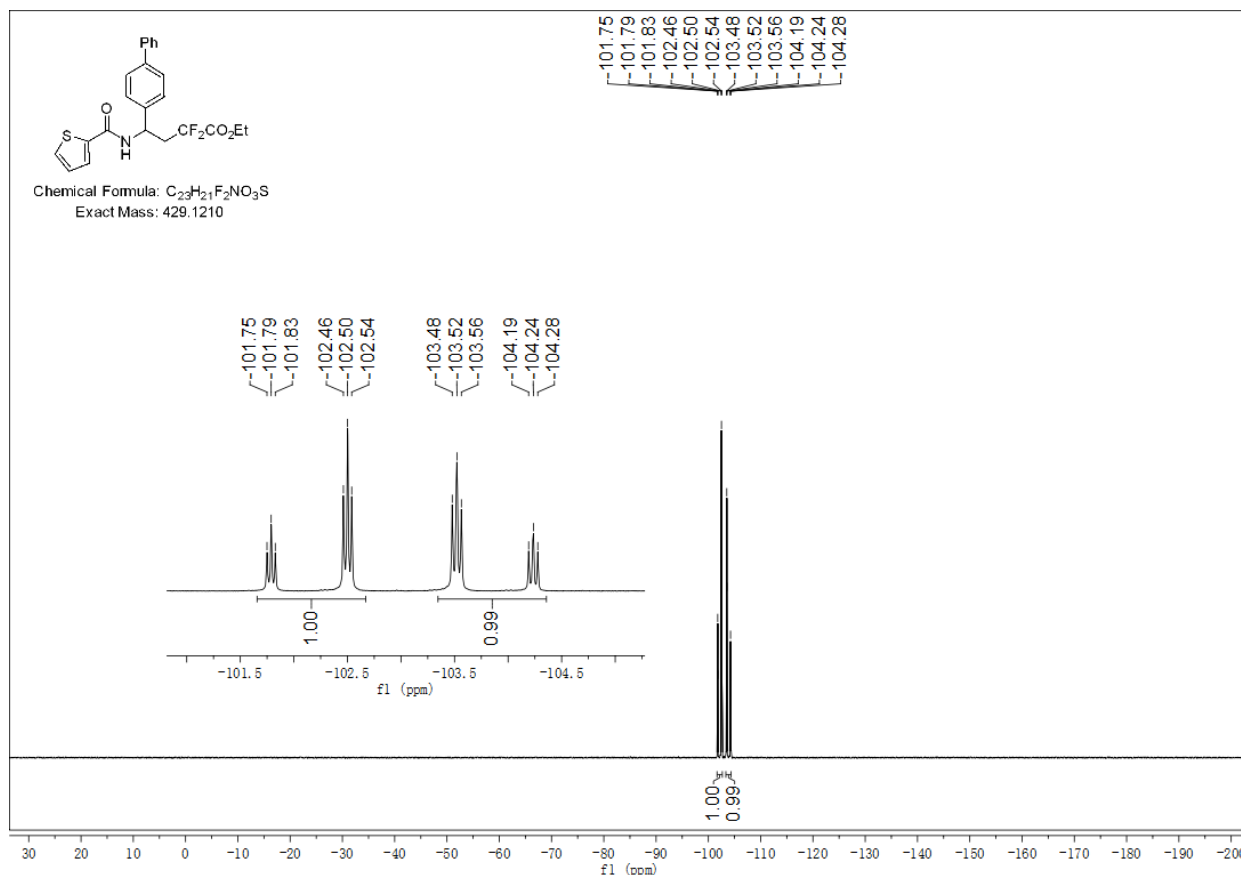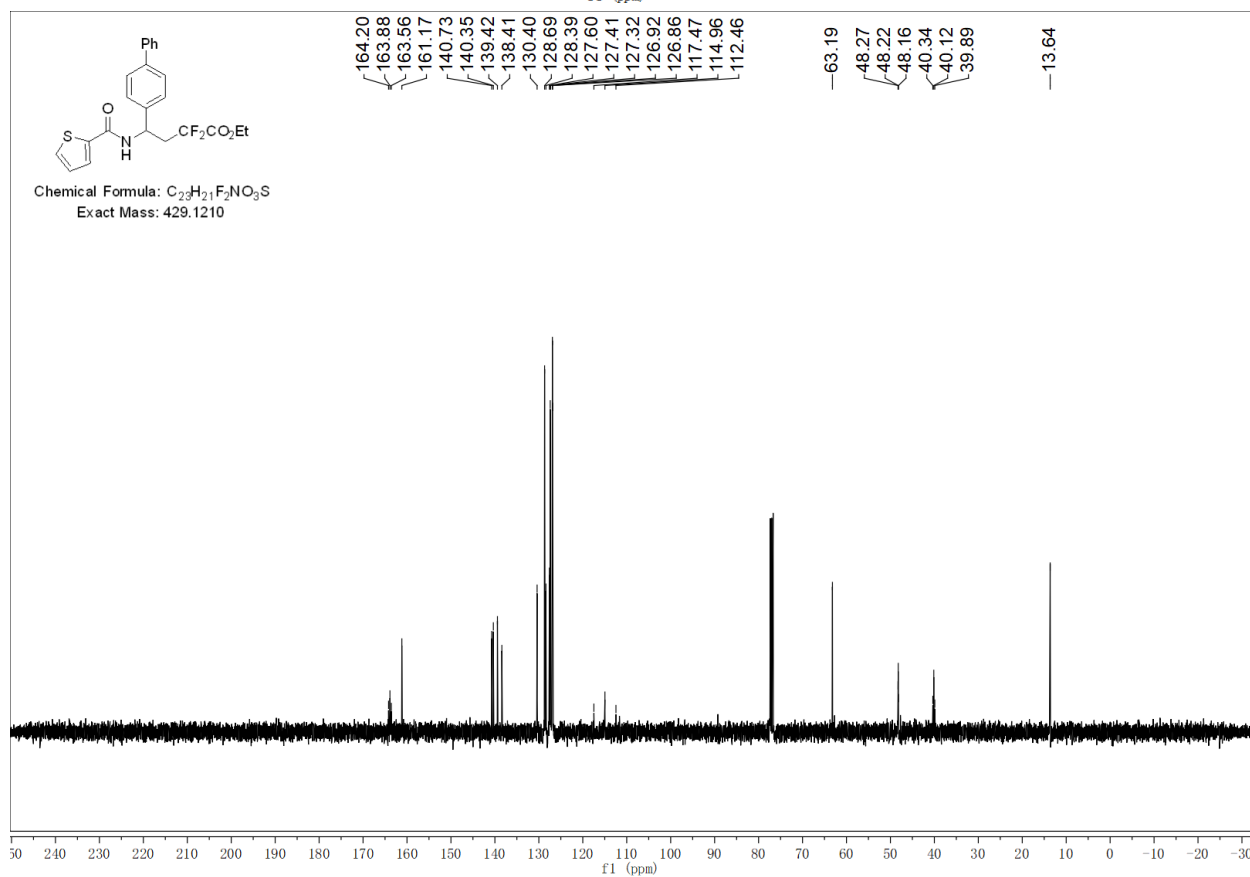

# Ethyl 4-acetamido-4-(4-phenoxyphenyl)butanoate (28)

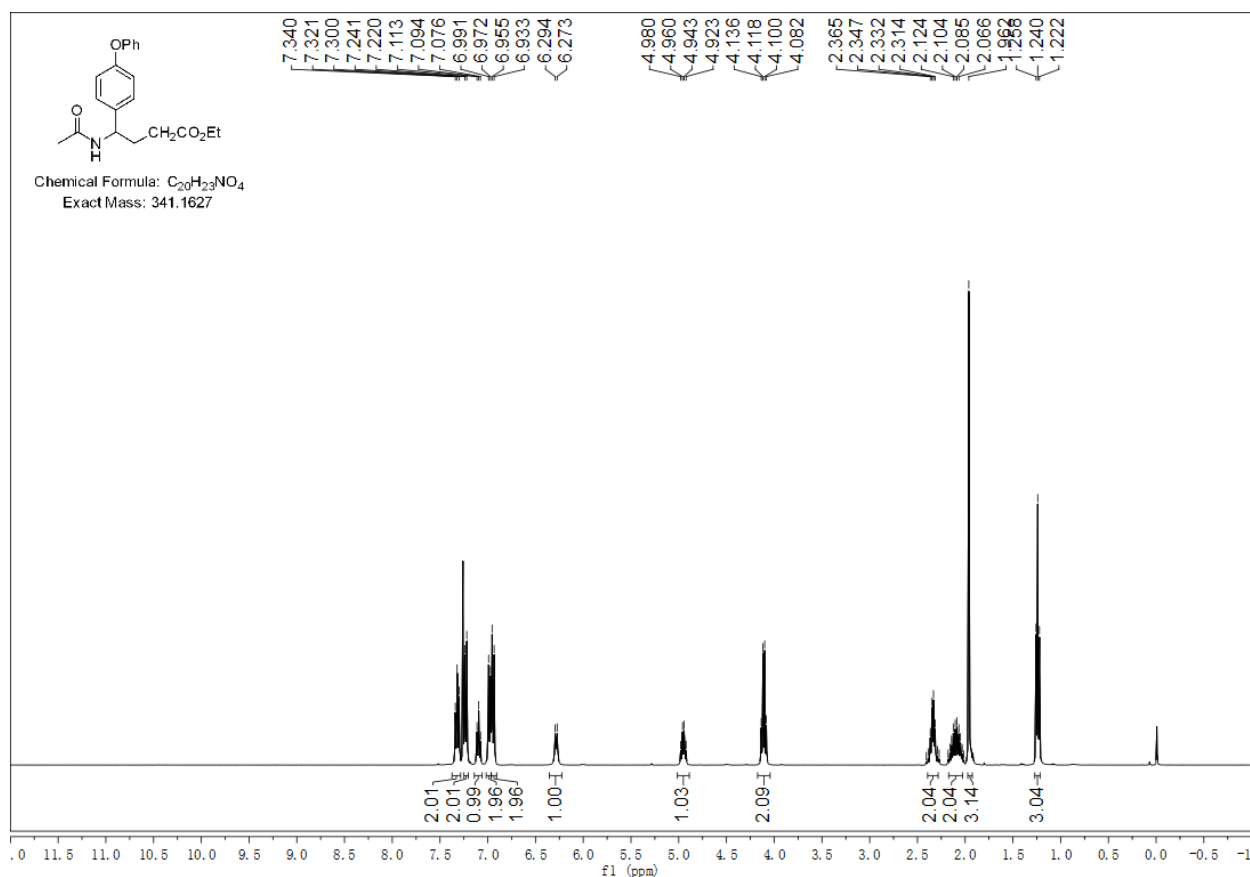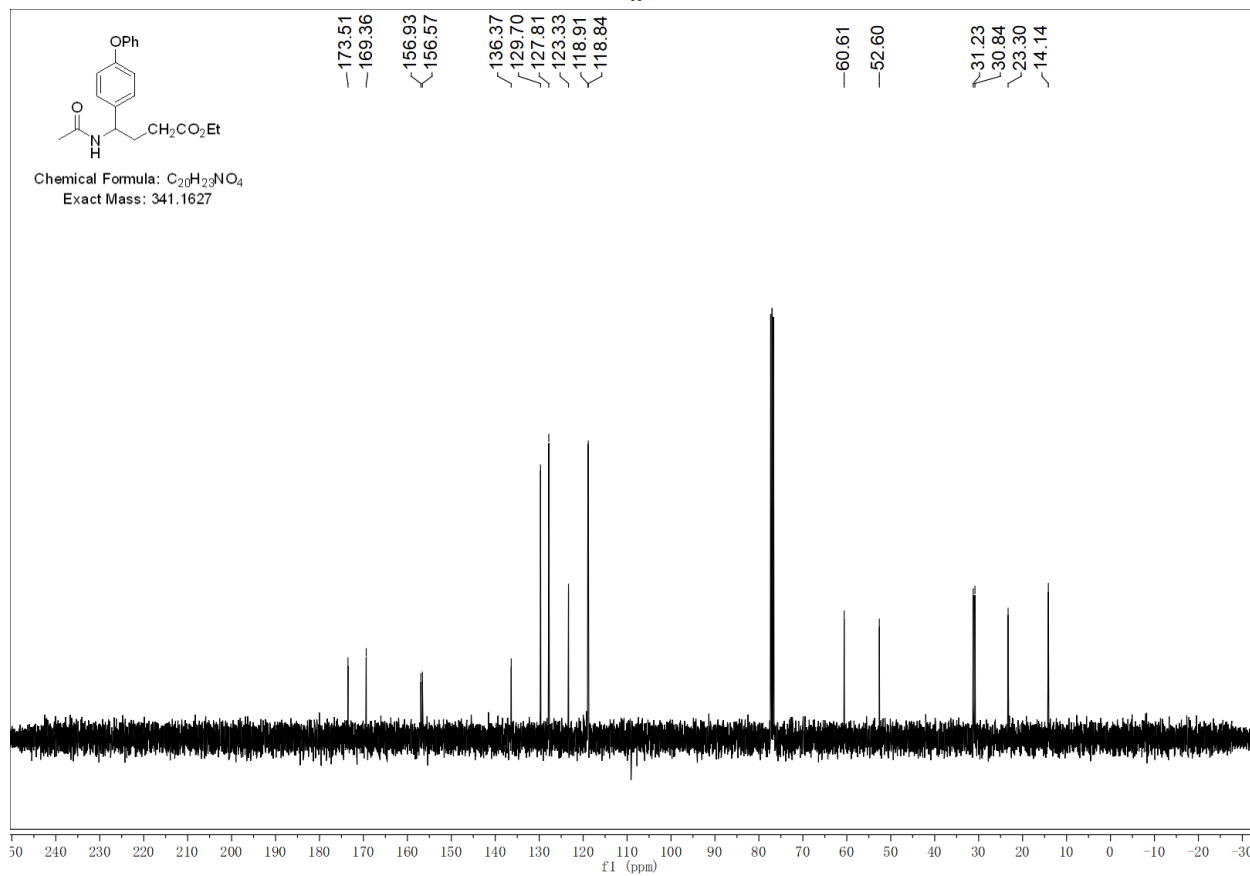



# Ethyl 4-(1-acetamido-4-ethoxy-4-oxobutyl)benzoate (29)

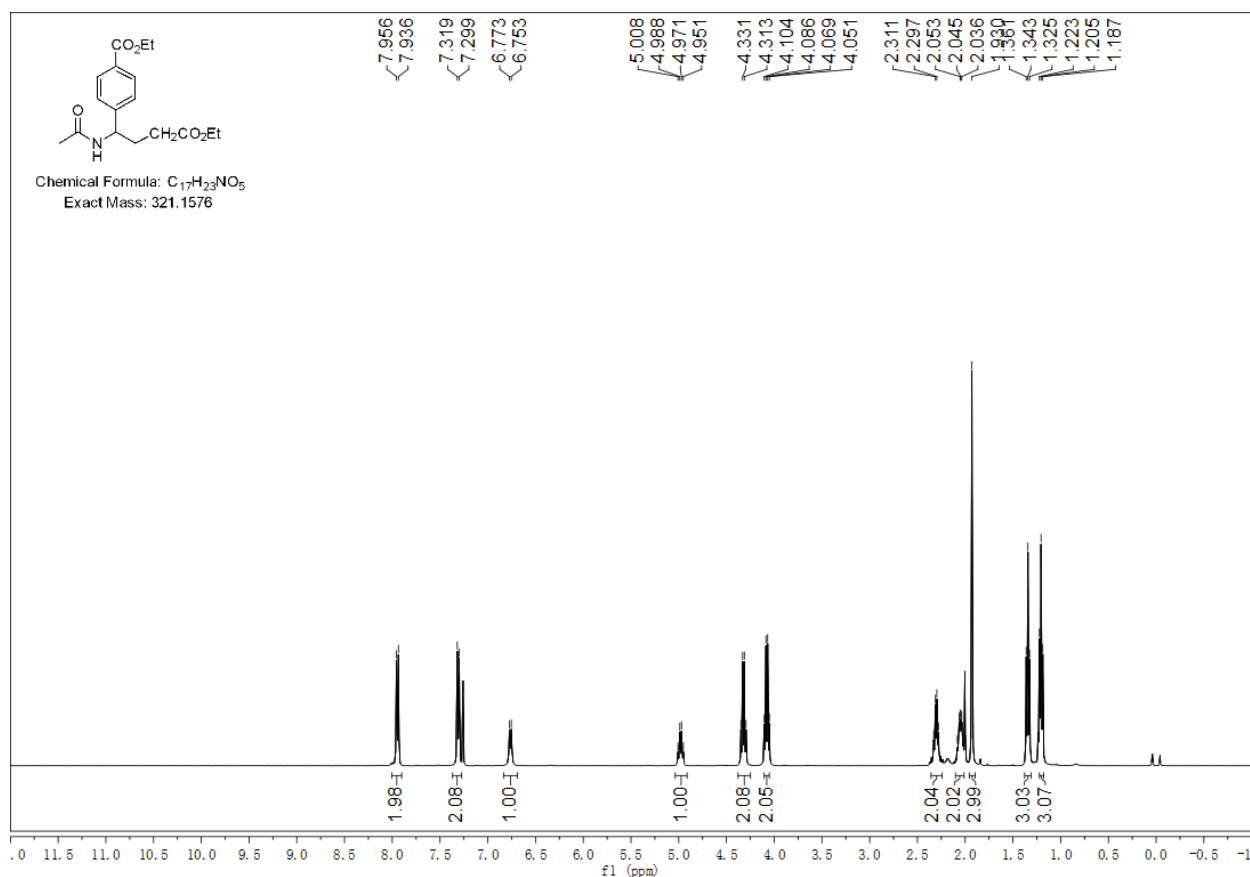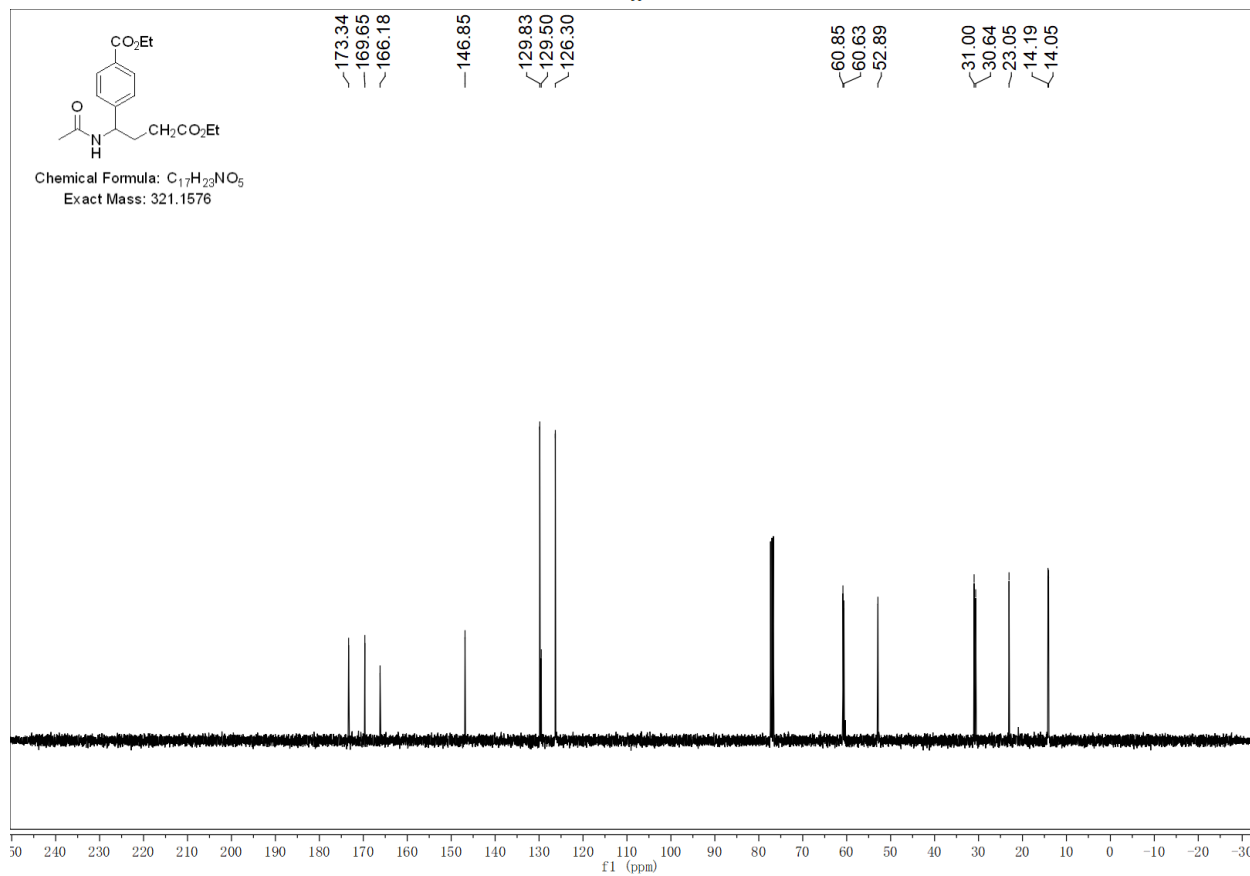

# Diethyl 2-(2-acetamido-2-(4-(ethoxycarbonyl)phenyl)ethyl)malonate (30)

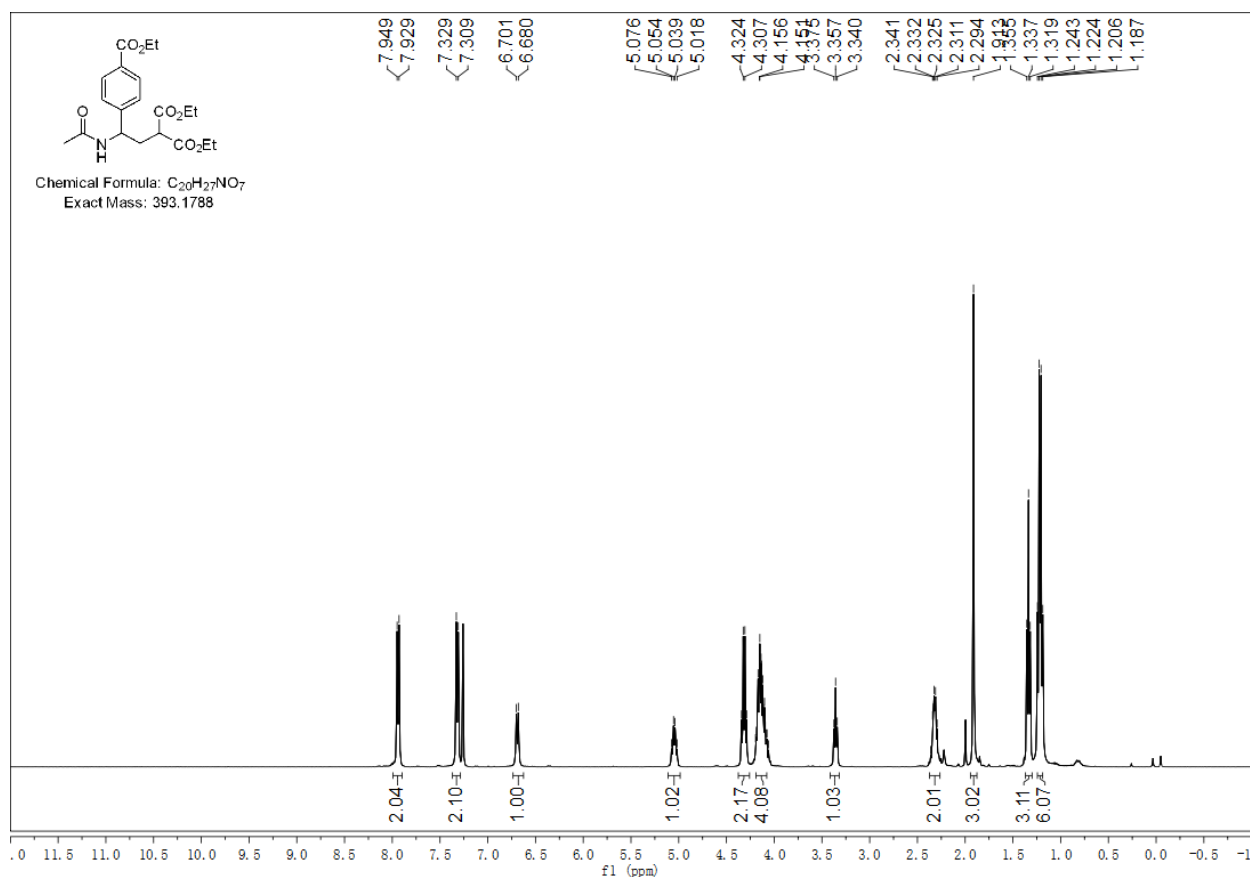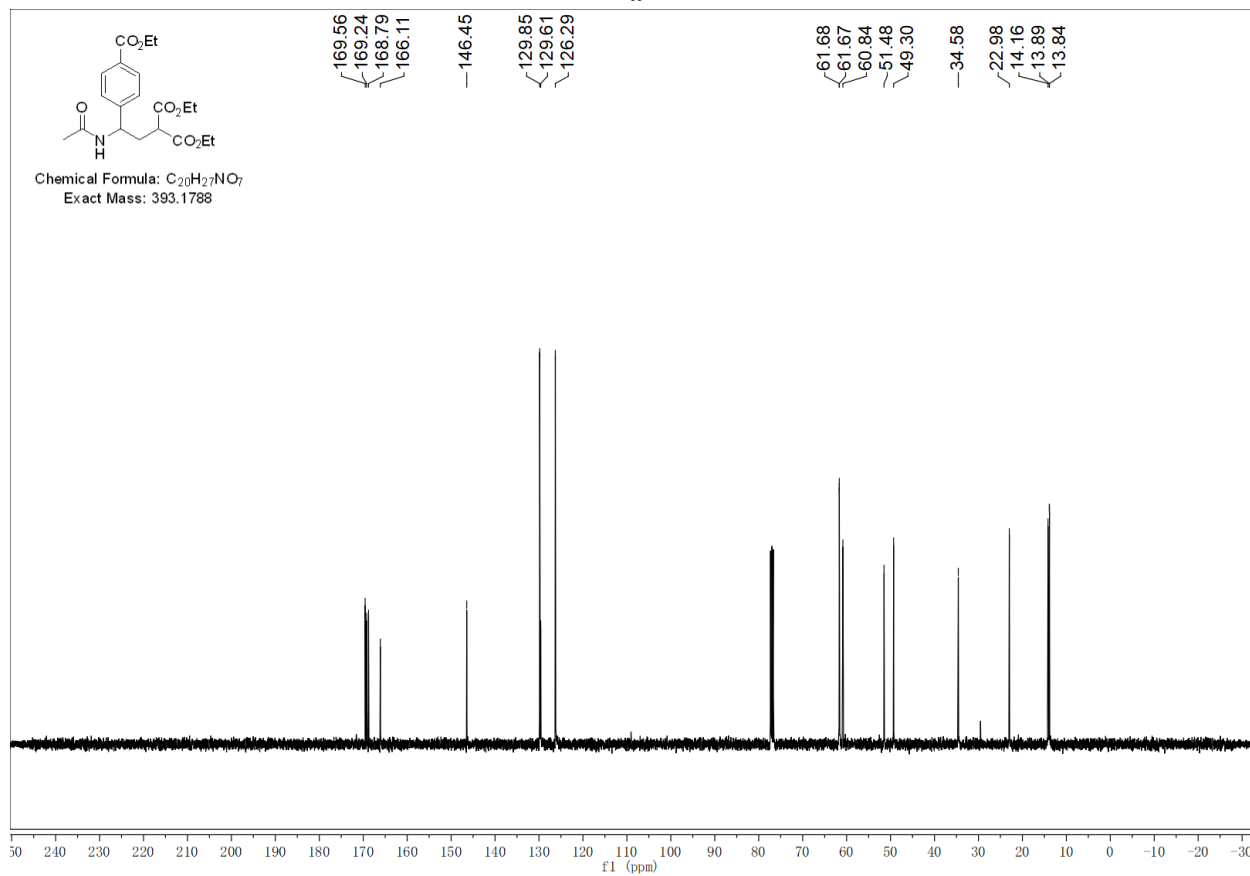

# Diethyl 2-(2-(4-(ethoxycarbonyl)phenyl)-2-formamidoethyl)malonate (31)

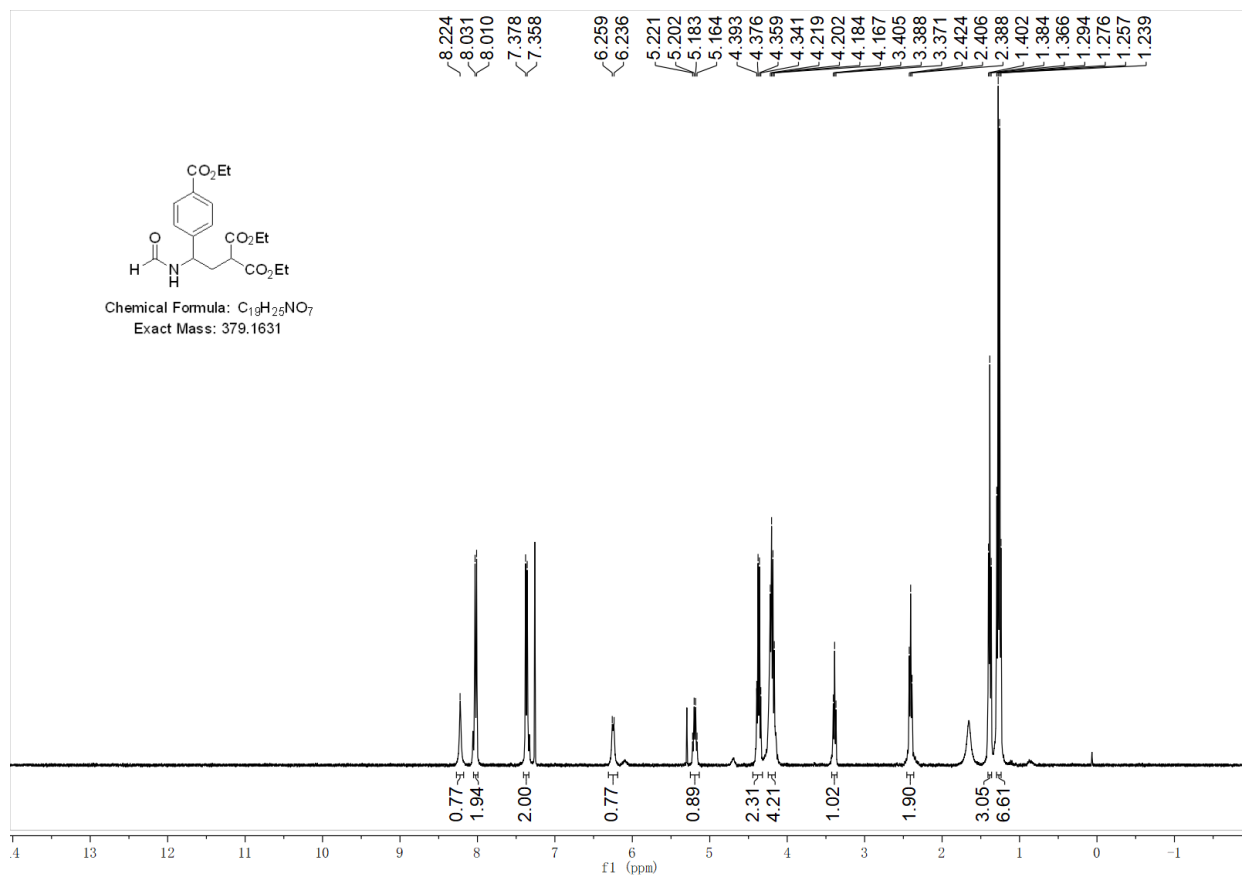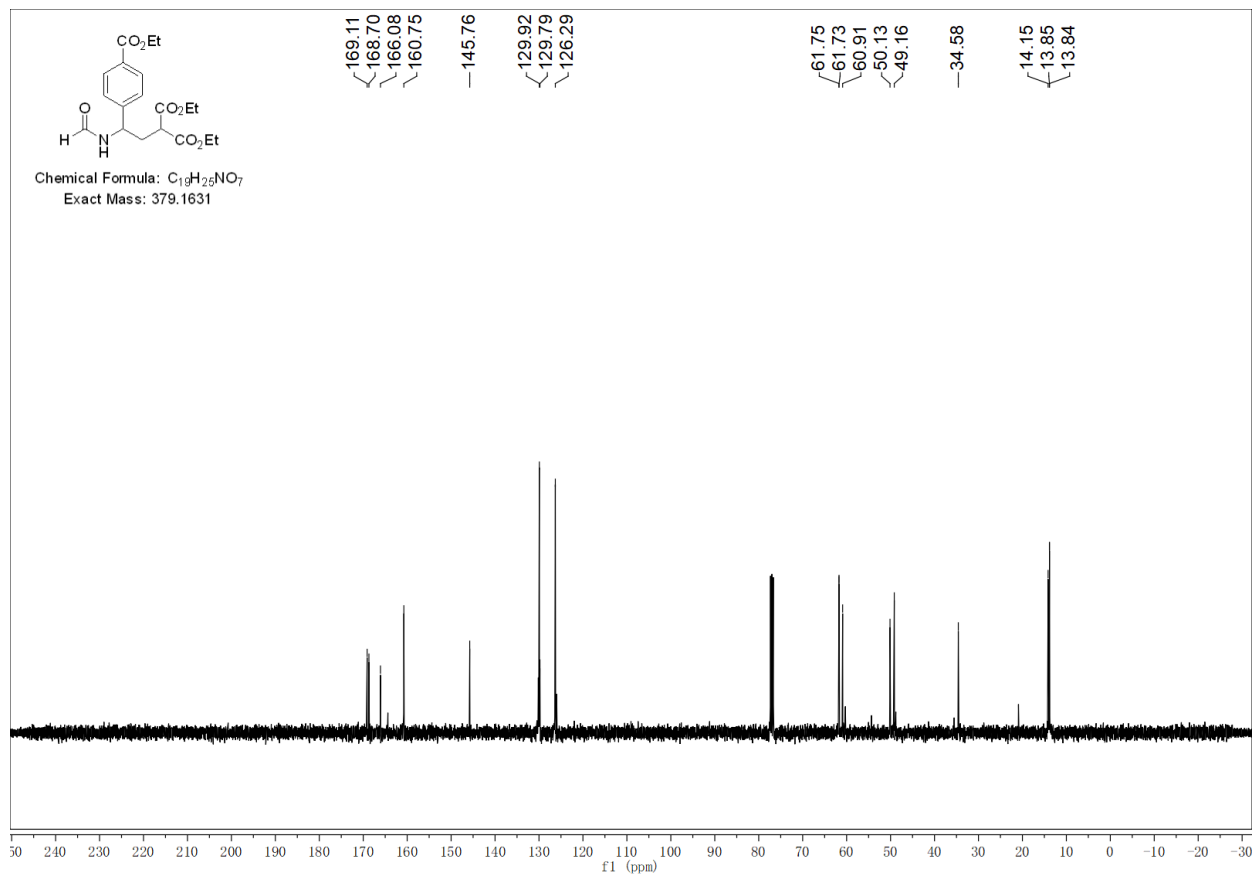

# Ethyl 4-([1,1'-biphenyl]-4-yl)-4-acetamido-2,2-difluoro-3-methylbutanoate (32)

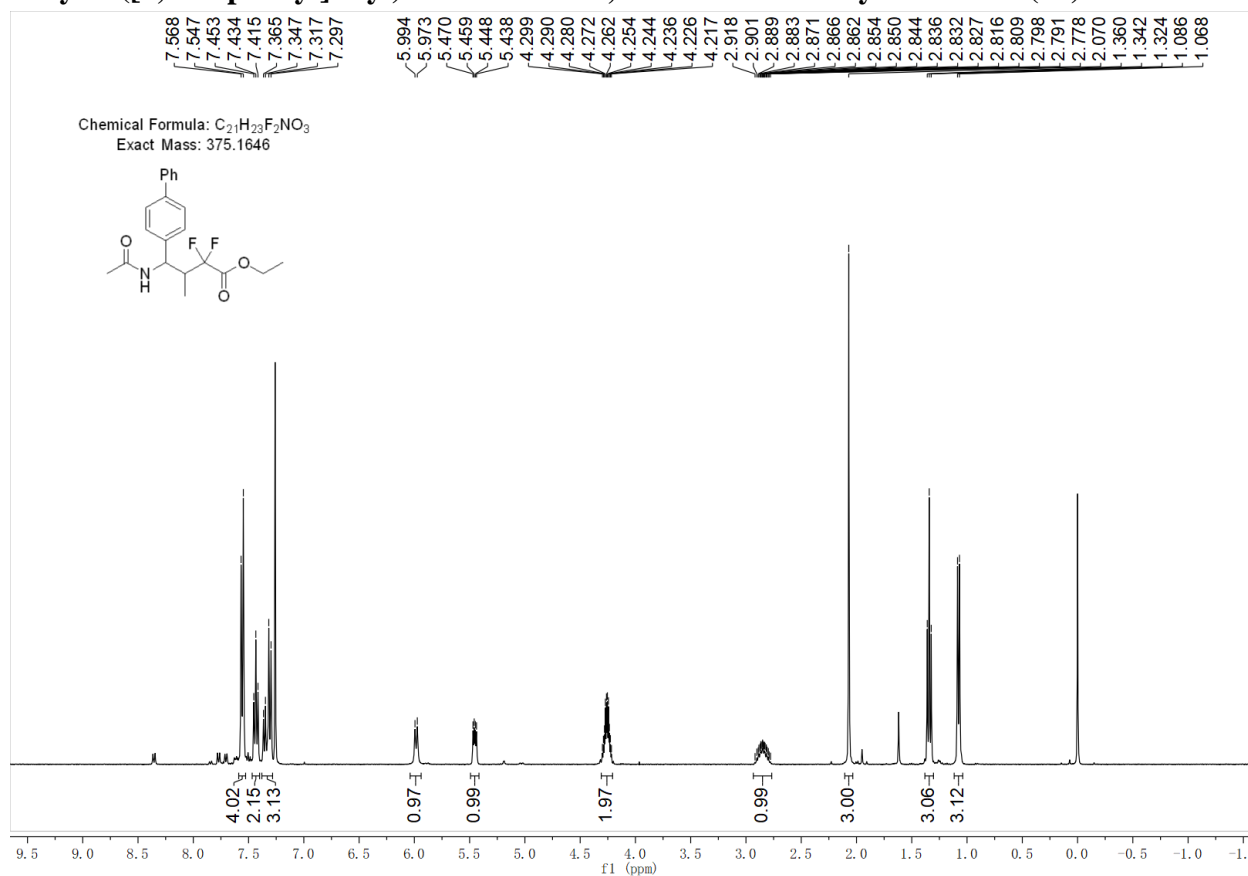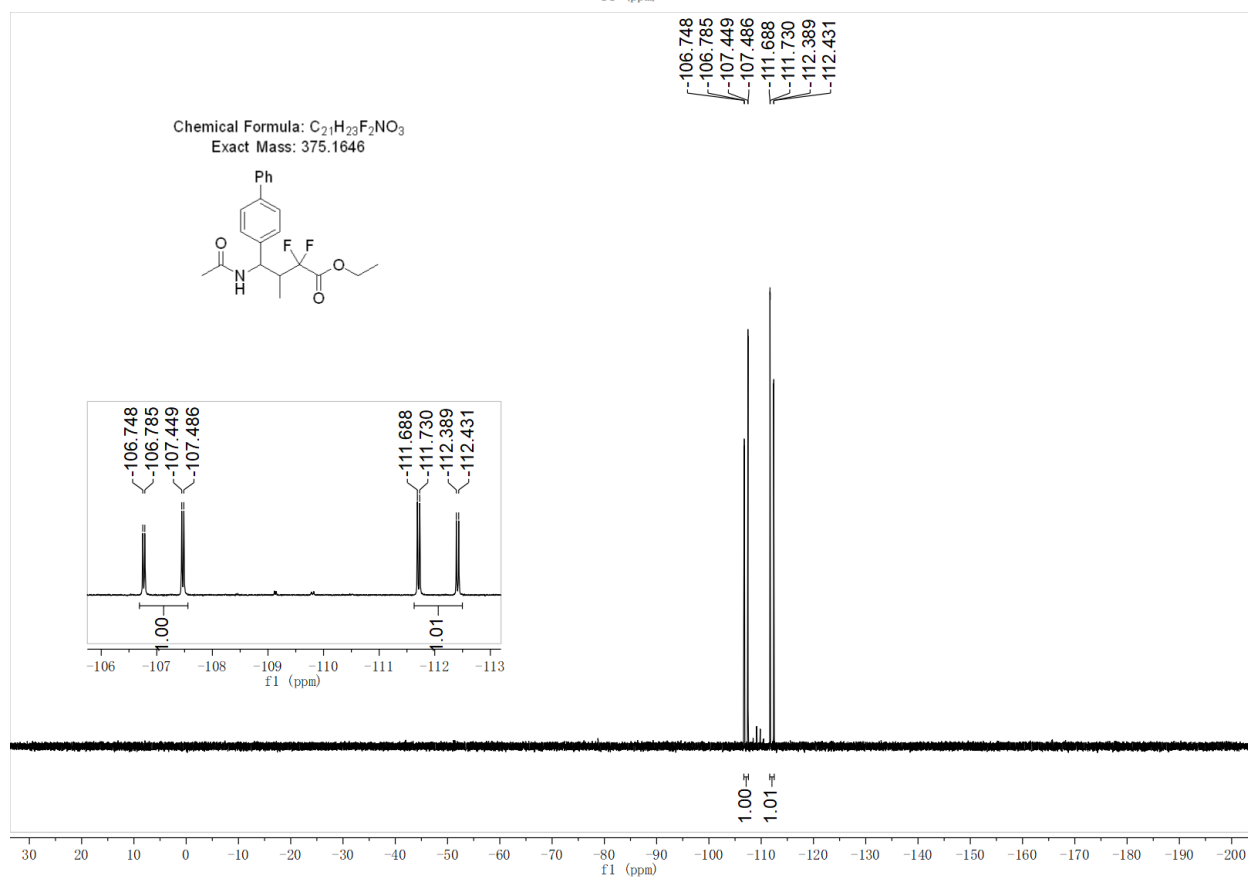

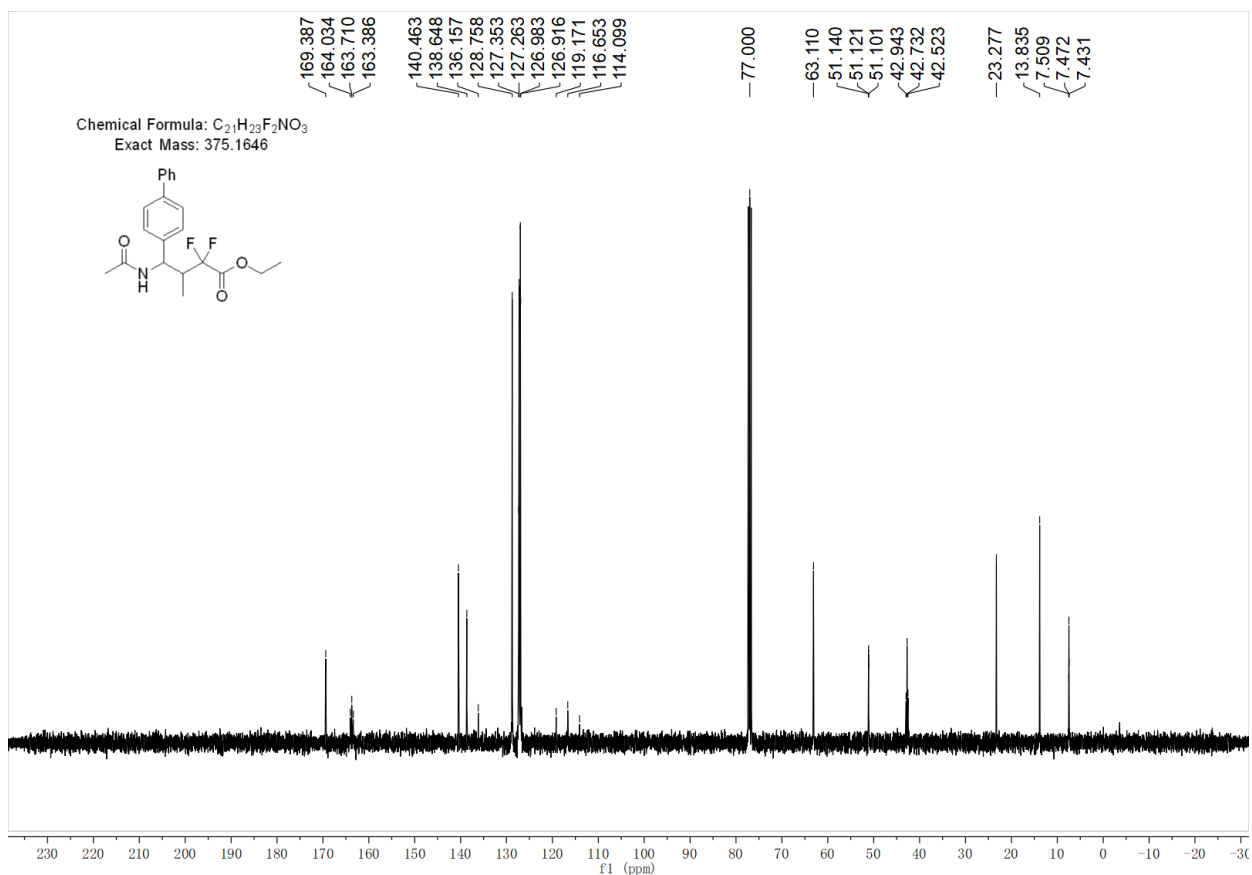

## 9. Copies of $^1H$ NMR, $^{13}C$ NMR, and $^{19}F$ NMR Spectra of Compounds 33-35.

### 4-([1,1'-biphenyl]-4-yl)-4-((tert-butoxycarbonyl)amino)-2,2-difluorobutanoic acid (33).

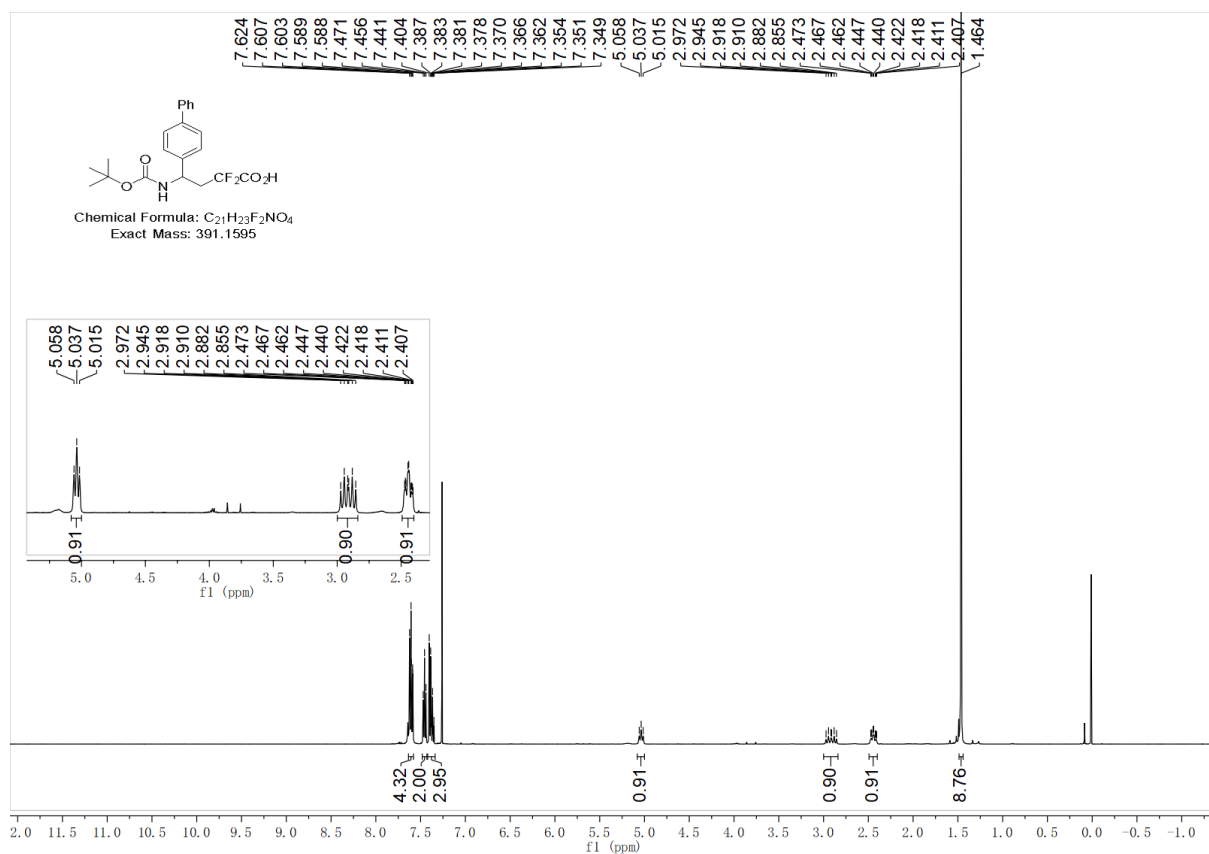



**Methyl(4-([1,1'-biphenyl]-4-yl)-4-((tert-butoxycarbonyl)amino)-2,2-difluorobutanoyl)valinate (34a)**

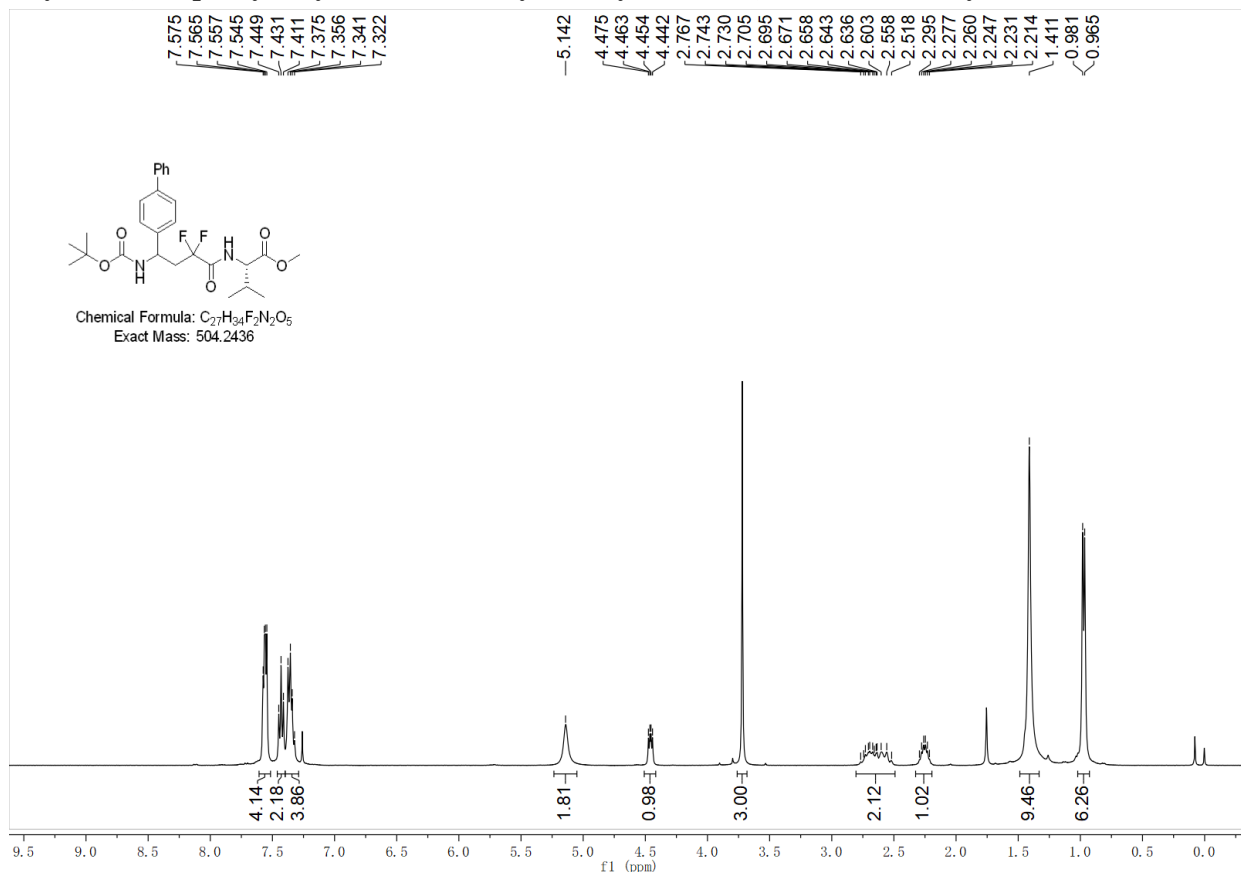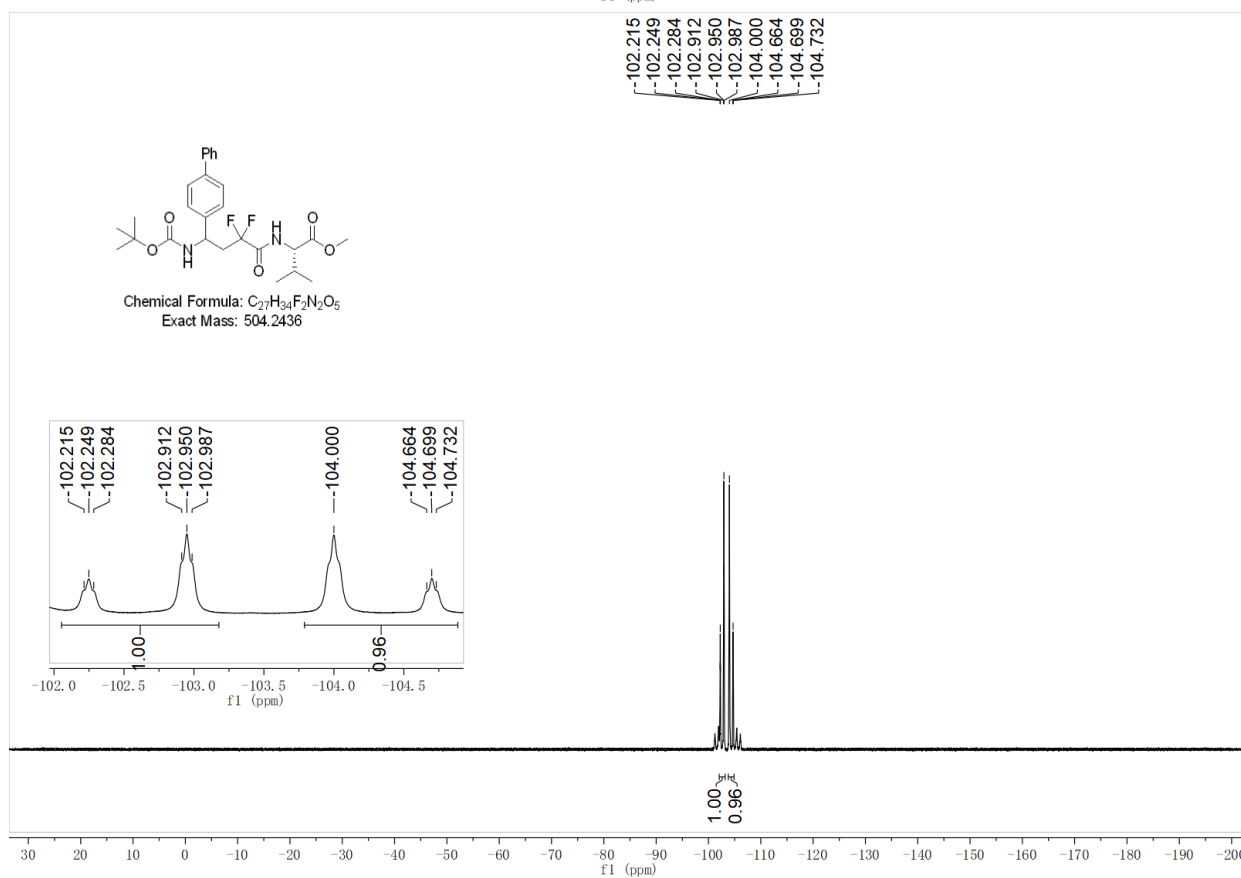

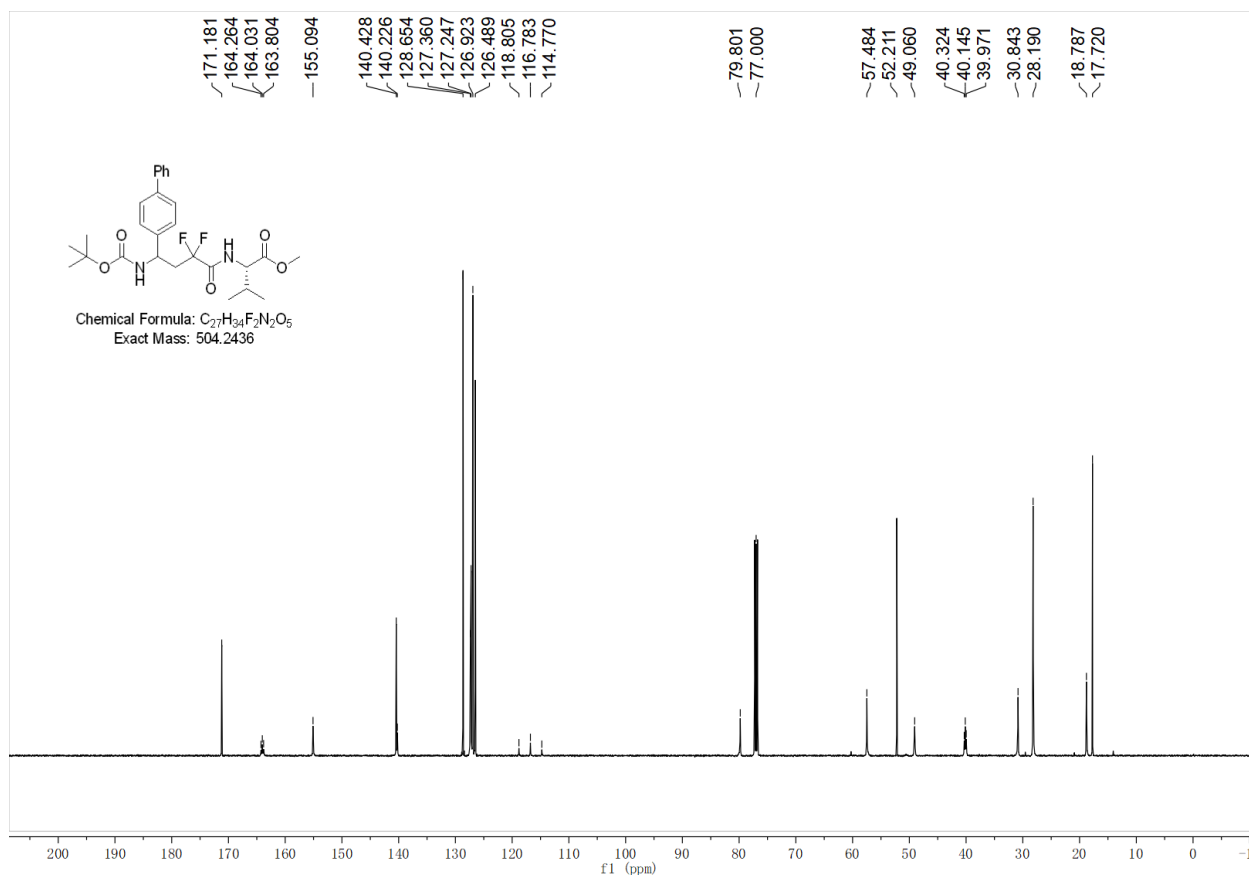

**Methyl(4-((1,1'-biphenyl)-4-yl)-4-((tert-butoxycarbonyl)amino)-2,2-difluorobutanoyl)valinate (34b)**

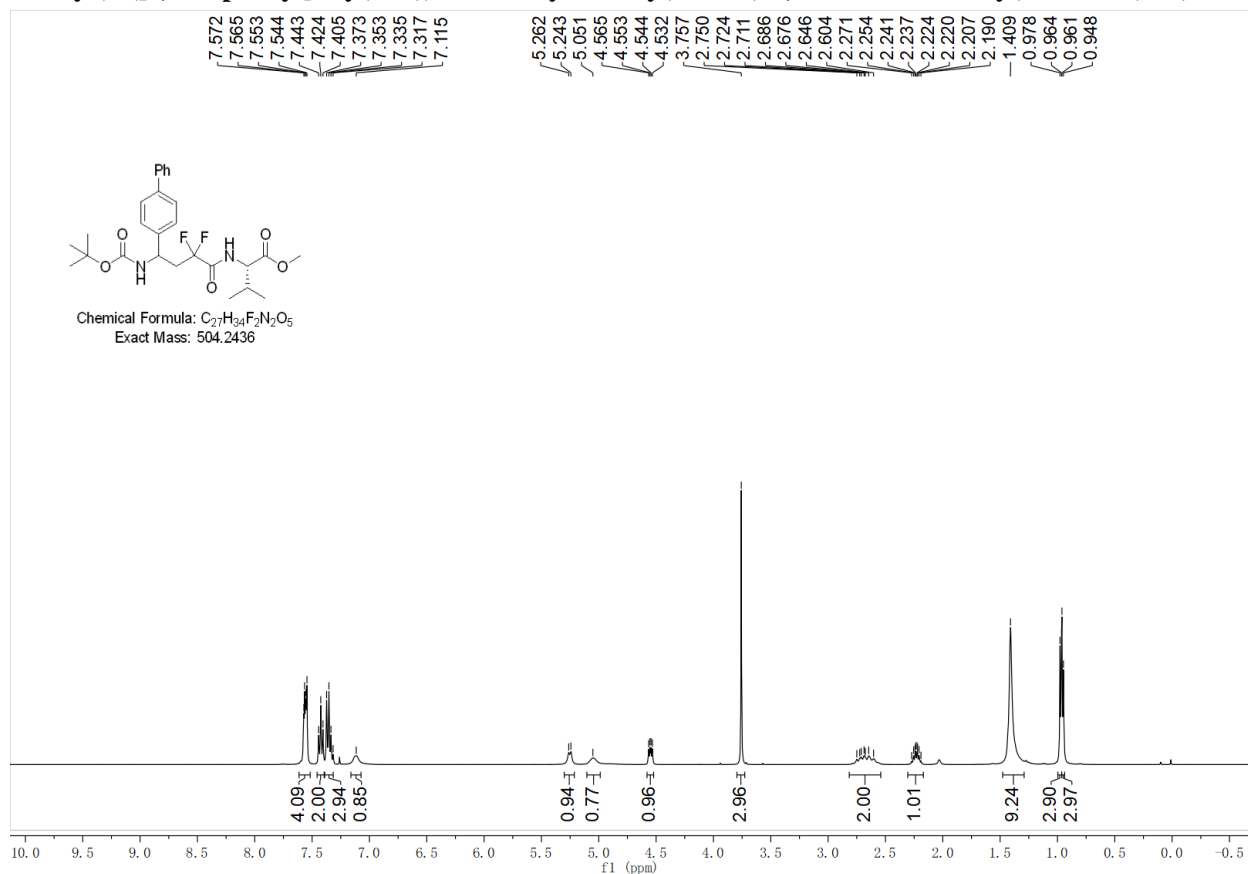



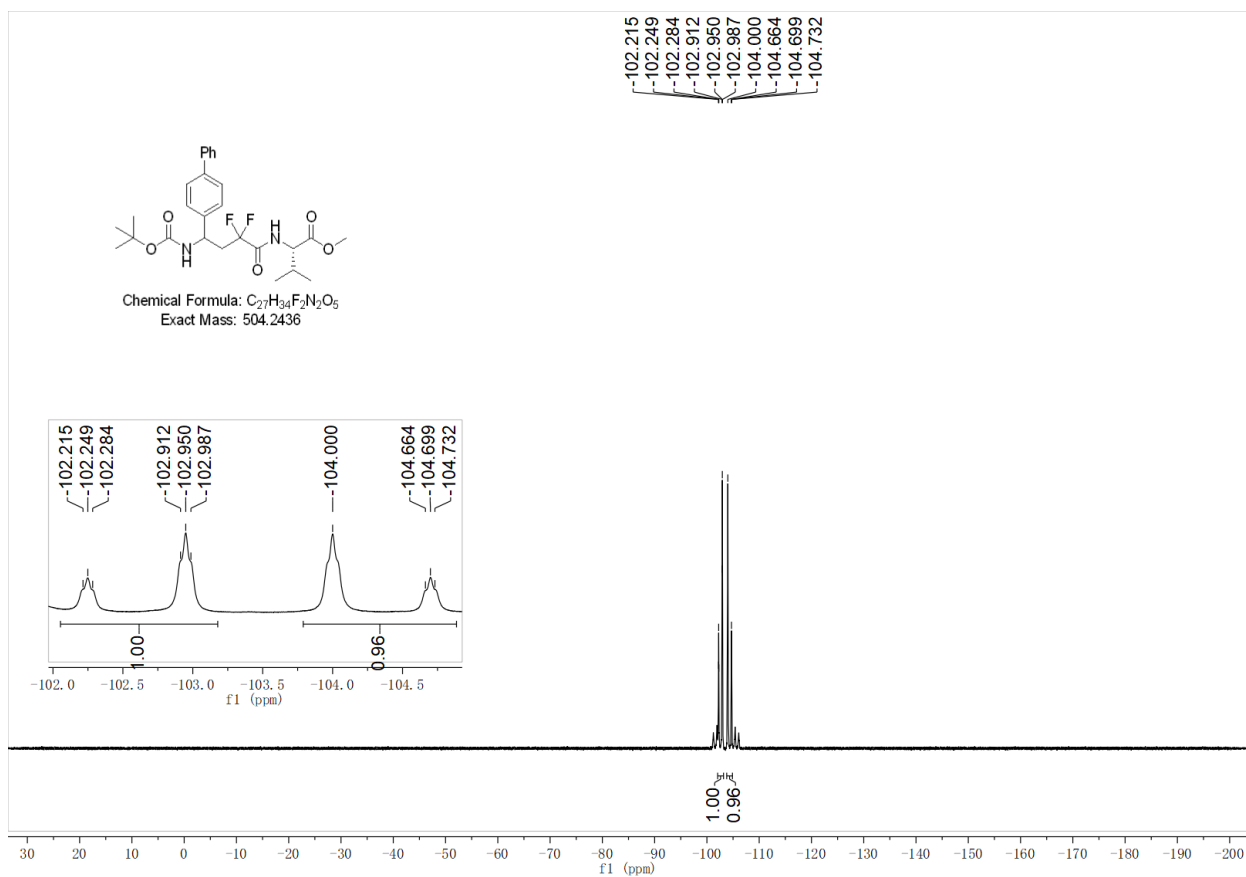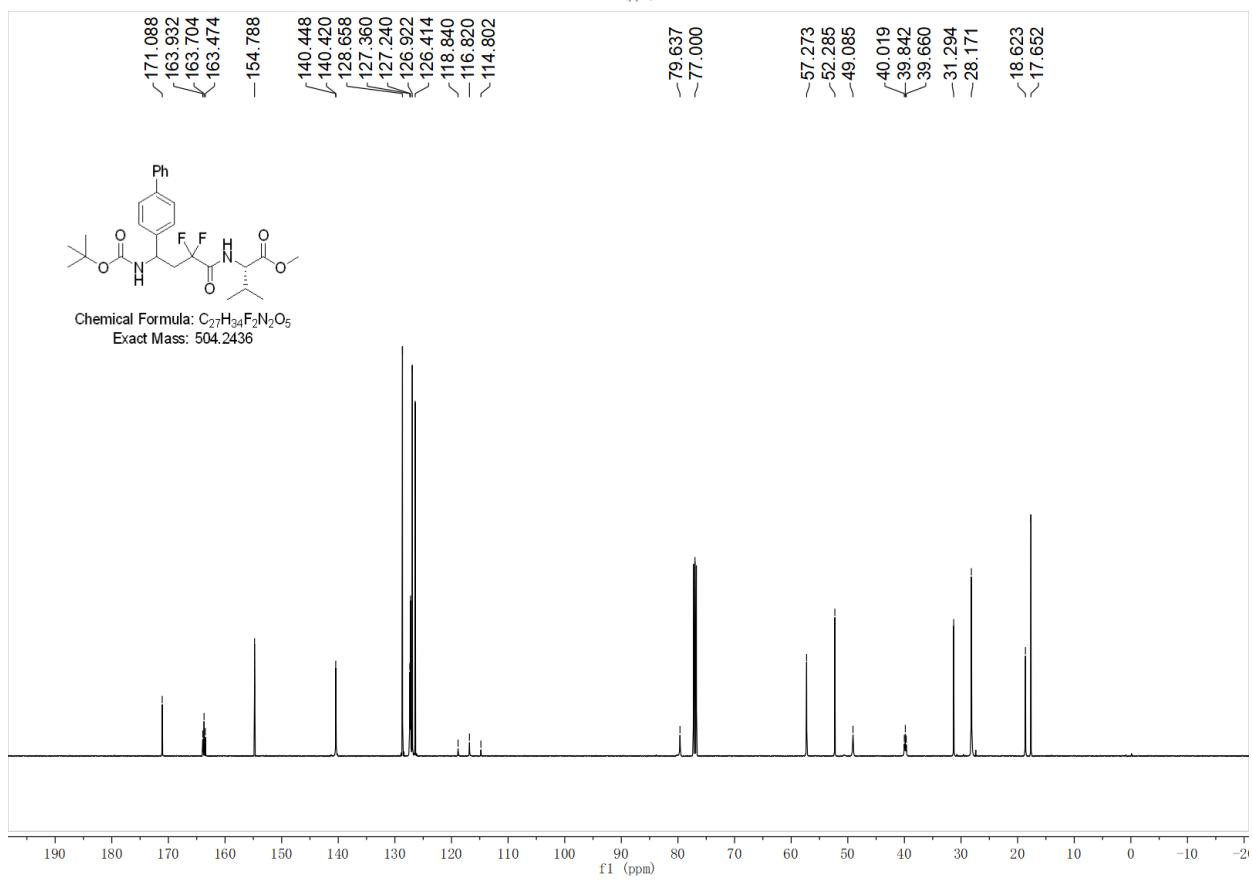

**5-([1,1'-biphenyl]-4-yl)-3,3-difluoropyrrolidin-2-one (35)**

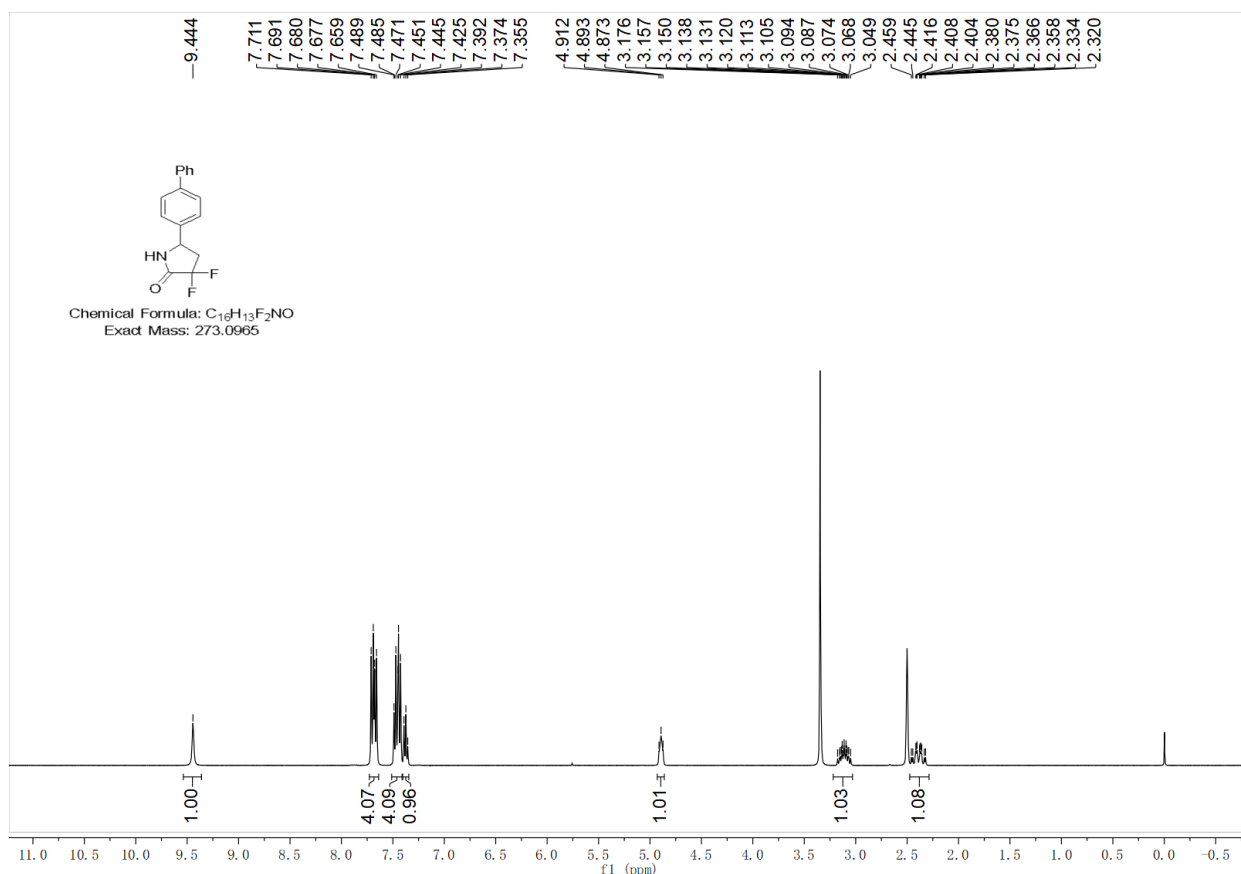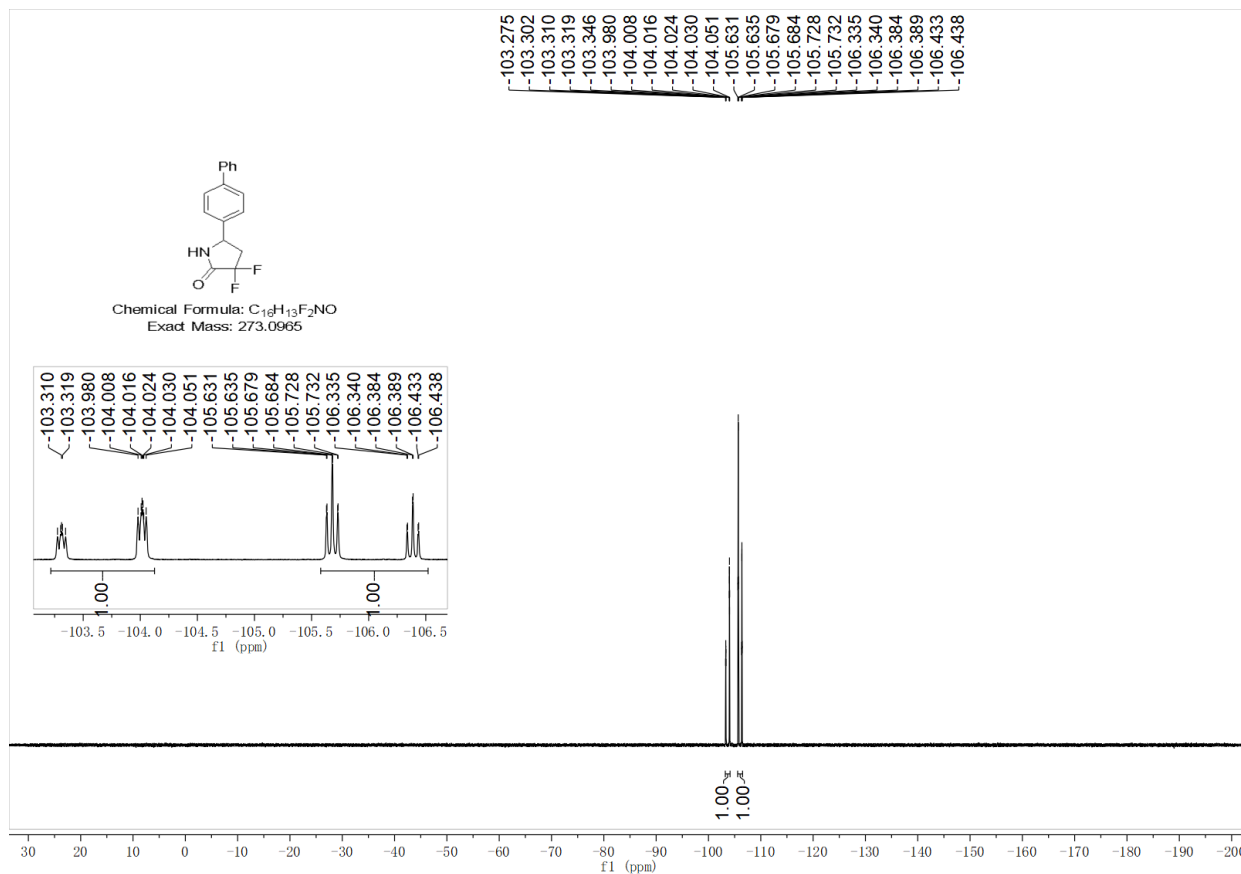

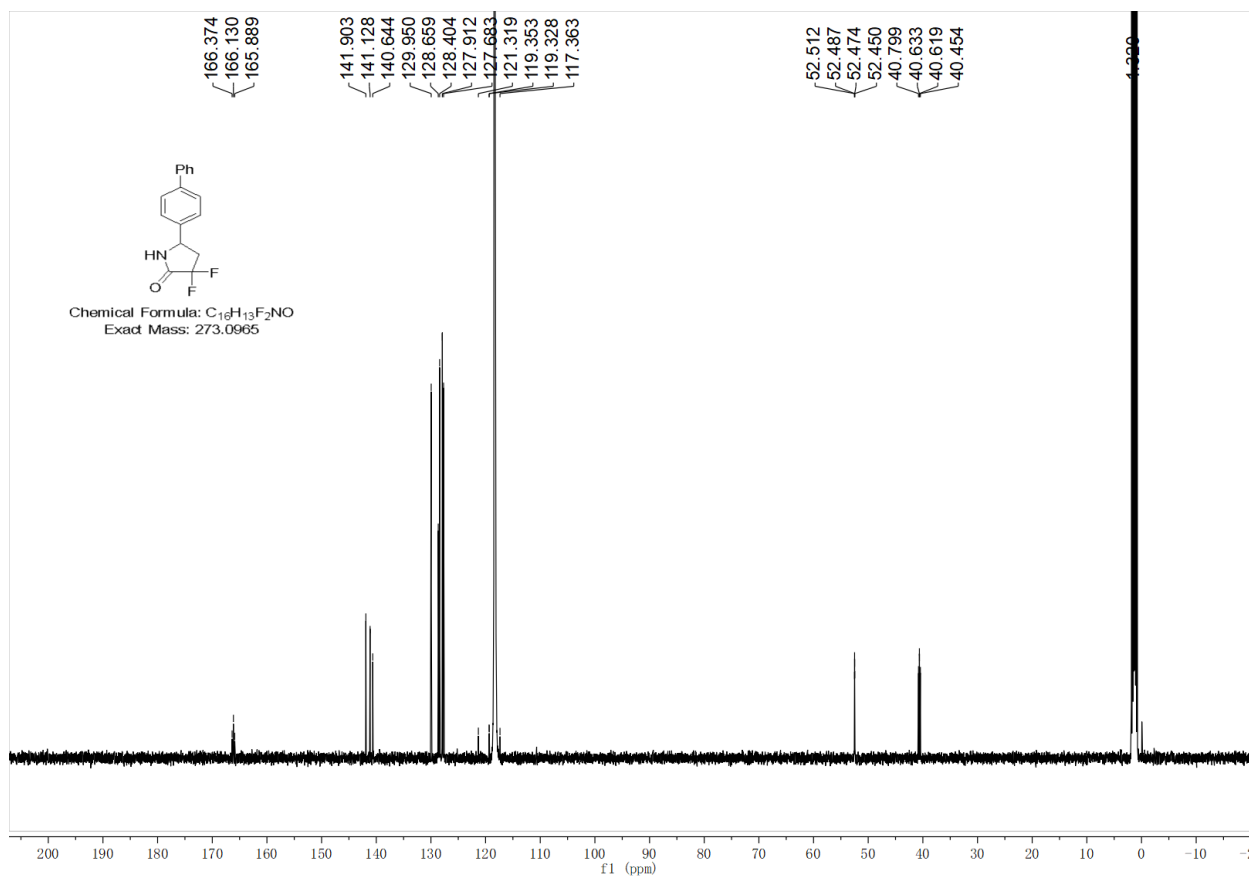

Supplement: c9cc09866f1.pdf [file c9cc09866f1.pdf]
